# Supplementary material for: Tale of Two viruses: Two coinfecting archaeal viruses provide insights into virus-virus interactions
Source: Research Square preprint supplement (doi:10.21203/rs.3.rs-7669873/v1), 2025-10-15
Supplement: Supplementary file 1 [file 310573c6a078df6e5ef30422.xlsx]

## Sheet: Density_gradients
Supplementary Table 2
							TEM			[DNA] ng/µL
Gradient	Concentration	Speed (rpm)	Time (hrs)	T (°C)	Gradient	Bands	Band 1	Band 2	Band 3	Band 1	Band 2	Band 3
Optiprep	35-15%	35000	4	4		2			/	27.295	51.982	/
Optiprep	40-25%	38000	20	4		3				60.035	24.713	4.04
CsCl	45-20%	25000	3	4		2			/	72.893	55.068	/
CsCl	0.5	38000	20	4		2			/	42.379	71.824	/
Sucrose	40-10%	28000	16	4		0		/	/	55.94	/	/
							Tebi-PV1 detected by PCR	Tebi-SV1 detected by PCR
