# Supplementary material for: Tale of Two viruses: Two coinfecting archaeal viruses provide insights into virus-virus interactions
Source: Research Square preprint supplement (doi:10.21203/rs.3.rs-7669873/v1), 2025-10-15
Supplement: Supplementary file 2 [file 3a428d715b9f8be3b9a6e562.xlsx]

## Sheet: Supplementary Table 5 Summary
Band 1
Viral protein id	Annotation	Coverage [%]	# Unique Peptides	#MW (kDa)	%NSAF
TebiSV_30	putative fibronectin type III repeat/Rhs family protein/ MotA proton channel family protein	12	7	84	0.01319
TebiPV_6	archaeal Type IV pilin-like protein	14	1	14.3	0.81976
TebiPV_12	spike protein	35	12	60.5	0.0182082
TebiSV_35	hypothetical protein	11	2	17.5	0.276379
Band 1A
Viral protein id	Annotation	Coverage [%]	# Unique Peptides	#MW (kDa)	%NSAF
TebiPV_12	spike protein	35	12	60.5	3.32788
TebiPV_6	archaeal Type IV pilin-like protein	14	1	14.3	2.47646
Band 1E
Viral protein id	Annotation	Coverage [%]	# Unique Peptides	#MW (kDa)	%NSAF
TebiPV_6	archaeal Type IV pilin-like protein	14	1	14.3	1.68315
TebiPV_12	spike protein	35	12	60.5	2.46745
TebiSV_27	hypothetical protein	5	2	75.1	1.30369
TebiSV_17	putative membrane transporter (potential ABC transporter)	3	1	20.8	1.24678
TebiSV_30	putative fibronectin type III repeat/Rhs family protein/ MotA proton channel family protein	12	7	84	0.297903
Band 2
Viral protein id	Annotation	Coverage [%]	# Unique Peptides	#MW (kDa)	%NSAF
TebiPV_6	archaeal Type IV pilin-like protein	14	1	14.3	0.961566
TebiSV_35	hypothetical protein	11	2	17.5	0.25472
TebiPV_12	spike protein	35	12	60.5	0.100688
TebiSV_30	putative fibronectin type III repeat/Rhs family protein/ MotA proton channel family protein	12	7	84	0.0243127
Band 2A
Viral protein id	Annotation	Coverage [%]	# Unique Peptides	#MW (kDa)	%NSAF
TebiPV_12	spike protein	35	12	60.5	33.8265
Band 3
Viral protein id	Annotation	Coverage [%]	# Unique Peptides	#MW (kDa)	%NSAF
TebiPV_6	archaeal Type IV pilin-like protein	14	1	14.3	0.61639
TebiPV_12	spike protein	35	12	60.5	0.344232
TebiSV_35	hypothetical protein	11	2	17.5	0.0816411
TebiSV_19	hypothetical protein	15	2	25.5	0.0550348
Band 3A
Viral protein id	Annotation	Coverage [%]	# Unique Peptides	#MW (kDa)	%NSAF
TebiPV_6	archaeal Type IV pilin-like protein	14	1	14.3	1.38792
TebiPV_12	spike protein	35	12	60.5	28.0329
Band 3D
Viral protein id	Annotation	Coverage [%]	# Unique Peptides	#MW (kDa)	%NSAF
TebiSV_30	putative fibronectin type III repeat/Rhs family protein/ MotA proton channel family protein	12	7	84	0.827116
TebiPV_12	spike protein	35	12	60.5	0.856346
TebiPV_6	archaeal Type IV pilin-like protein	14	1	14.3	0.876226
TebiSV_35	hypothetical protein	11	2	17.5	0.270798
TebiSV_24	hypothetical protein	8	1	21.3	0.202428
TebiSV_19	hypothetical protein	15	2	25.5	0.182547
Band 4
Viral protein id	Annotation	Coverage [%]	# Unique Peptides	#MW (kDa)	%NSAF
TebiPV_6	archaeal Type IV pilin-like protein	14	1	14.3	1.09979
TebiSV_35	hypothetical protein	11	2	17.5	0.0926979
TebiPV_12	spike protein	35	12	60.5	0.0732847
Band 4A
Viral protein id	Annotation	Coverage [%]	# Unique Peptides	#MW (kDa)	%NSAF
TebiPV_12	spike protein	35	12	60.5	3.74131
Band 5
Viral protein id	Annotation	Coverage [%]	# Unique Peptides	#MW (kDa)	%NSAF
TebiPV_6	archaeal Type IV pilin-like protein	14	1	14.3	1.46072
TebiSV_35	hypothetical protein	11	2	17.5	0.246238
TebiPV_16	hypothetical protein	10	1	39	0.0512148
Band 5A
Viral protein id	Annotation	Coverage [%]	# Unique Peptides	#MW (kDa)	%NSAF
TebiPV_12	spike protein	35	12	60.5	13.3196
Band 5D
Viral protein id	Annotation	Coverage [%]	# Unique Peptides	#MW (kDa)	%NSAF
TebiSV_30	putative fibronectin type III repeat/Rhs family protein/ MotA proton channel family protein	12	7	84	0.293564
Band 6
Viral protein id	Annotation	Coverage [%]	# Unique Peptides	#MW (kDa)	%NSAF
TebiPV_6	archaeal Type IV pilin-like protein	14	1	14.3	1.17663
TebiPV_15	hypothetical protein	5	1	28.2	0.0757023
TebiSV_35	hypothetical protein	11	2	17.5	0.0641715
Band 6A
Viral protein id	Annotation	Coverage [%]	# Unique Peptides	#MW (kDa)	%NSAF
TebiPV_6	archaeal Type IV pilin-like protein	14	1	14.3	1.6072
TebiPV_12	spike protein	35	12	60.5	0.785368
Band 7
Viral protein id	Annotation	Coverage [%]	# Unique Peptides	#MW (kDa)	%NSAF
TebiPV_6	archaeal Type IV pilin-like protein	14	1	14.3	1.03802
TebiSV_35	hypothetical protein	11	2	17.5	0.0802
Band 8A
Viral protein id	Annotation	Coverage [%]	# Unique Peptides	#MW (kDa)	%NSAF
TebiPV_6	archaeal Type IV pilin-like protein	14	1	14.3	4.51038
TebiPV_12	spike protein	35	12	60.5	12.1221

## Sheet: Raw data
Accession	Description	Exp. q-value: Combined	Sum PEP Score	Coverage [%]	# Peptides	# PSMs	# Unique Peptides	# AAs	MW [kDa]	calc. pI	Band 1	Band 1A	Band 1D	Band 1E	Band 2	Band 2A	Band 3	Band 3A	Band 3D	Band 4	Band 4A	Band 5	Band 5A	Band 5D	Band 6	Band 6A	Band 6B	Band 6C	Band 7	Band 8A	Band 9	Band 9A
Tebi-SV1_00035	Tebi-SV1_00035	0	7.771	11	2	14	2	151	17.5	4.77	0.276379	0	0	0	0.25472	0	0.0816411	0	0.270798	0.0926979	0	0.246238	0	0	0.0641715	0	0	0	0.0802	0	0	0
Tebi-SV1_00030	Tebi-SV1_00030	0	26.845	12	7	20	7	791	84	4.06	0.01319	0	0	0.297903	0.0243127	0	0	0	0.827116	0	0	0	0	0.293564	0	0	0	0	0	0	0	0
Tebi-SV1_00027	Tebi-SV1_00027	0.001	3.741	5	2	4	2	723	75.1	3.8	0	0	0	1.30369	0	0	0	0	0	0	0	0	0	0	0	0	0	0	0	0	0	0
Tebi-SV1_00024	Tebi-SV1_00024	0.005	3.021	8	1	1	1	202	21.3	4.48	0	0	0	0	0	0	0	0	0.202428	0	0	0	0	0	0	0	0	0	0	0	0	0
Tebi-SV1_00019	Tebi-SV1_00019	0	4.179	15	2	2	2	224	25.5	4.61	0	0	0	0	0	0	0.0550348	0	0.182547	0	0	0	0	0	0	0	0	0	0	0	0	0
Tebi-SV1_00017	Tebi-SV1_00017	0.038	1.552	3	1	1	1	189	20.8	4.77	0	0	0	1.24678	0	0	0	0	0	0	0	0	0	0	0	0	0	0	0	0	0	0
TebiPV_6	TebiPV_6	0	19.28	14	1	100	1	140	14.3	4.16	0.81976	2.47646	0	1.68315	0.961566	0	0.61639	1.38792	0.876226	1.09979	0	1.46072	0	0	1.17663	1.6072	0	0	1.03802	4.51038	0	0
TebiPV_16	TebiPV_16	0.033	1.679	10	1	1	1	363	39	4.75	0	0	0	0	0	0	0	0	0	0	0	0.0512148	0	0	0	0	0	0	0	0	0	0
TebiPV_15	TebiPV_15	0.01	2.773	5	1	2	1	256	28.2	4.36	0	0	0	0	0	0	0	0	0	0	0	0	0	0	0.0757023	0	0	0	0	0	0	0
TebiPV_12	TebiPV_12	0	178.058	35	12	421	12	573	60.5	3.98	0.0182082	3.32788	0	2.46745	0.100688	33.8265	0.344232	28.0329	0.856346	0.0732847	3.74131	0	13.3196	0	0	0.785368	0	0	0	12.1221	0	0
CBBNIB_15220	hypothetical protein	0	4.94	11	2	4	2	255	28.8	4.45	0	0	0	0	0	0	0	0	0	0	0	0	0	0	0.151998	0	0	0	0	0	0	0
CBBNIB_15210	hypothetical protein	0	49.736	25	15	40	15	926	103.1	4.6	0.135205	0	0	0	0.436132	0	0.0399389	0	0	0.022674	0	0	0	0	0.0104642	0	0	0	0	0	0	0
CBBNIB_15205	hypothetical protein	0	4.459	10	2	2	2	332	38.4	5.17	0	0	0	0	0	0	0	0	0	0	0	0	0	0	0.0583728	0	0	0	0	0	0	0
CBBNIB_15200	hypothetical protein	0	11.158	18	6	10	6	603	67.6	4.65	0.051907	0	0	0	0.0318927	0	0.0817765	0	0	0.0232129	0	0	0	0	0	0	0	0	0	0	0	0
CBBNIB_15185	hypothetical protein	0	6.852	4	2	6	2	393	43.7	4.5	0.106191	0	0	0	0.0489347	0	0.0313685	0	0	0	0	0	0	0	0	0	0	0	0	0	0	0
CBBNIB_15020	hypothetical protein	0	6.142	14	3	8	3	205	20.9	4.27	0.0508942	0	0	0	0	0	0	0	0	0.10242	0	0	0	0	0.0945355	0	0	0	0.118148	0	0	0
CBBNIB_15015	hypothetical protein	0	5.463	6	2	2	2	329	34.3	4.65	0	0	0	0	0	0	0	0	0	0	0	0	0	0	0.0589051	0	0	0	0	0	0	0
CBBNIB_14980	hypothetical protein	0	16.869	10	4	7	4	627	67.2	4.32	0.0499201	0	0	0	0.0920159	0	0.0196616	0	0	0	0	0	0	0	0	0	0	0	0	0	0	0
CBBNIB_14965	hypothetical protein	0	9.568	20	2	7	2	352	35.4	4.15	0.0592802	0	0	0	0.109269	0	0.0350222	0	0	0.0397653	0	0	0	0	0	0	0	0	0	0	0	0
CBBNIB_14960	Amidophosphoribosyltransferase	0	10.812	10	3	5	3	499	53.6	4.65	0	0	0	0	0	0	0	0	0	0.0701272	0	0	0	0	0	0	0	0	0	0	0	0
CBBNIB_14940	hypothetical protein	0.001	3.684	5	2	2	2	738	81.4	4.44	0.0282745	0	0	0	0	0	0	0	0	0	0	0	0	0	0	0	0	0	0	0	0	0
CBBNIB_14920	hypothetical protein	0	4.263	3	1	1	1	507	55.5	4.67	0	0	0	0	0	0	0	0	0	0.0138041	0	0	0	0	0	0	0	0	0	0	0	0
CBBNIB_14880	hypothetical protein	0	20.839	12	7	23	7	633	66.9	9.54	0.131859	0	0	0	0	0	0.0389504	0	0	0.0663383	0	0	0	0	0.0918473	0	0	0	0.0191314	0	0	0
CBBNIB_14860	Universal stress protein	0.021	2.086	7	1	9	1	144	15.1	4.44	0.217361	0	0	0	0.133551	0	0.0856098	0	0	0.048602	0	0	0	0	0.201873	0	0	0	0	0	0	0
CBBNIB_14855	hypothetical protein	0	26.681	20	8	56	8	683	71.1	4.23	0.198584	0	0	0	0.253414	0	0.234643	0.0948308	0.299345	0.0717289	0	0.0544391	0	0	0.0283745	0	0	0	0.0709236	0	0	0
CBBNIB_14850	hypothetical protein	0	23.278	15	4	7	4	382	42.1	4.51	0	0	0	0	0.151031	0	0	0	0	0.0183212	0	0.146002	0	0	0	0	0	0	0	0	0	0
CBBNIB_14835	hypothetical protein	0.028	1.771	3	1	1	1	614	63.9	4.46	0.0169924	0	0	0	0	0	0	0	0	0	0	0	0	0	0	0	0	0	0	0	0	0
CBBNIB_14825	hypothetical protein	0	20.086	7	6	10	6	1577	169.4	4.48	0.0396955	0	0	0	0.0243898	0	0	0	0	0.00887596	0	0	0	0	0	0	0	0	0	0	0	0
CBBNIB_14820	hypothetical protein	0	9.96	8	4	5	4	701	76.6	4.63	0	0	0	0	0	0	0.0879301	0	0	0	0	0	0	0	0	0	0	0	0	0	0	0
CBBNIB_14815	4-alpha-glucanotransferase	0	12.291	13	5	6	5	496	56	4.36	0	0	0	0	0	0	0	0	0	0.0846616	0	0	0	0	0	0	0	0	0	0	0	0
CBBNIB_14795	hypothetical protein	0	5.909	3	1	2	1	436	45	4.34	0.0239296	0	0	0	0	0	0	0	0	0.016052	0	0	0	0	0	0	0	0	0	0	0	0
CBBNIB_14790	hypothetical protein	0	16.046	15	3	8	3	318	34.4	7.52	0	0	0	0	0	0	0	0	0	0.0220085	0	0	0	0	0.0914141	0	0	0	0.15233	0	0	0
CBBNIB_14760	hypothetical protein	0.021	2.113	10	1	2	1	157	17.7	4.98	0.132908	0	0	0	0	0	0	0	0	0	0	0	0	0	0	0	0	0	0	0	0	0
CBBNIB_14755	hypothetical protein	0	9.476	20	5	6	5	520	55.7	4.35	0	0	0	0	0	0	0	0	0	0.0807542	0	0	0	0	0	0	0	0	0	0	0	0
CBBNIB_14715	hypothetical protein	0	37.056	18	9	52	9	622	65.2	4.61	0.35225	0	0	0	0.185511	0	0.0792785	0	0.0657404	0.0900153	0	0.119556	0	0.746653	0.0467358	0	0	0	0.0584093	0	0	0
CBBNIB_14615	hypothetical protein	0	8.44	8	2	5	2	285	30.7	8.66	0.109824	0	0	0	0.0674783	0	0	0	0	0.0245568	0	0	0	0	0	0	0	0	0	0	0	0
CBBNIB_14610	hypothetical protein	0	7.48	7	2	2	2	628	67.9	4.61	0	0	0	0	0	0	0.0196303	0	0	0	0	0.0296034	0	0	0	0	0	0	0	0	0	0
CBBNIB_14605	hypothetical protein	0	7.342	10	2	4	2	396	41.7	5.03	0.0526935	0	0	0	0	0	0	0	0	0.0176735	0	0	0	0	0.0244694	0	0	0	0	0	0	0
CBBNIB_14590	HIT family protein	0	9.355	13	1	2	1	152	15.7	4.44	0.13728	0	0	0	0	0	0	0	0	0	0	0	0	0	0	0	0	0	0	0	0	0
CBBNIB_14555	hypothetical protein	0	381.534	56	21	1809	21	535	58.9	4.18	1.79414	4.86034	2.99441	3.96406	6.039	3.62291	17.6046	25.6657	21.3242	1.64829	0	1.21623	0	2.17018	0.289791	0	0	0	0.407446	1.18029	6.97844	0
CBBNIB_14550	hypothetical protein	0	14.202	11	5	29	5	331	36.4	7.62	0.283685	0	0	0	0.174302	0	0.0744883	0	0	0.10572	0	0.168498	0	0	0.117098	0	0	0	0.10976	0	0	0
CBBNIB_14545	hypothetical protein	0	7.222	12	2	6	2	328	35.4	5.11	0.0636177	0	0	0	0.0586321	0	0.112754	0	0	0	0	0	0	0	0	0	0	0	0	0	0	0
CBBNIB_14540	hypothetical protein	0	27.89	29	8	26	8	373	41.3	4.4	0.167828	0	0	0	0.0515585	0	0.0991513	0	0	0.075053	0	0.348892	0	0	0.129891	0	0	0	0	0	0	0
CBBNIB_14535	Oligopeptide ABC transporter (ATP-binding protein)	0	64.623	34	9	52	9	451	50.2	4.7	0.254471	0	0	0	0.127925	0	0.164006	0	0	0.124145	0	0.659546	0	1.02975	0.064456	0	0	0	0.0805556	0	0	0
CBBNIB_14500	Adenosylhomocysteinase	0	8.373	12	3	6	3	435	47	4.48	0.0239846	0	0	0	0	0	0	0	0	0.0804447	0	0	0	0	0	0	0	0	0	0	0	0
CBBNIB_14450	hypothetical protein	0.044	1.503	7	1	1	1	97	10.7	4.82	0.10756	0	0	0	0	0	0	0	0	0	0	0	0	0	0	0	0	0	0	0	0	0
CBBNIB_14400	hypothetical protein	0	13.475	14	3	6	3	325	33.8	4.35	0	0	0	0	0	0	0	0	0	0	0	0	0	0	0.17889	0	0	0	0	0	0	0
CBBNIB_14395	hypothetical protein	0	11.44	12	4	10	4	336	35.6	4.59	0.124206	0	0	0	0.114472	0	0.0366899	0	0	0.0624883	0	0	0	0	0	0	0	0	0	0	0	0
CBBNIB_14385	hypothetical protein	0	4.077	5	2	3	2	506	52.7	4.6	0	0	0	0	0	0	0	0	0	0.0414942	0	0	0	0	0	0	0	0	0	0	0	0
CBBNIB_14380	hypothetical protein	0.011	2.631	3	2	2	2	1300	137.4	4.28	0.00802562	0	0	0	0	0	0	0	0	0	0	0	0	0	0.00745376	0	0	0	0	0	0	0
CBBNIB_14365	hypothetical protein	0	4.416	8	2	6	2	205	21.5	3.92	0.101788	0	0	0	0.0938114	0	0	0	0	0.03414	0	0.0906876	0	0	0.0472678	0	0	0	0	0	0	0
CBBNIB_14350	DUF1028 domain-containing protein	0	8.08	13	2	2	2	230	24.7	4.16	0	0	0	0	0	0	0	0	0	0	0	0	0	0	0	0	0	0	0.105306	0	0	0
CBBNIB_14345	hypothetical protein	0	15.659	12	6	16	6	695	80	4.68	0.0900717	0	0	0	0.027671	0	0.124165	0	0	0.0201401	0	0	0	0	0	0	0	0	0	0	0	0
CBBNIB_14340	hypothetical protein	0	6.289	7	3	7	3	807	87.2	4.68	0.025857	0	0	0	0.0714919	0	0.0305522	0	0	0	0	0	0	0	0	0	0	0	0	0	0	0
CBBNIB_14335	hypothetical protein	0.023	1.872	7	2	2	2	461	50.6	4.4	0	0	0	0	0	0	0	0	0	0.0151815	1.55009	0	0	0	0	0	0	0	0	0	0	0
CBBNIB_14330	hypothetical protein	0	8.038	6	2	4	2	691	78.2	4.78	0.0301977	0	0	0	0.0278312	0	0.0178405	0	0	0	0	0	0	0	0	0	0	0	0	0	0	0
CBBNIB_14305	hypothetical protein	0	23.654	15	3	26	3	285	30.4	3.83	0.0732162	0	0	0	0	0	0	0	0	0.515693	0	0.130463	0	0	0.0339996	0	0	0	0	0	0	0
CBBNIB_14275;CBBNIB_06210	hypothetical protein;hypothetical protein	0	4.094	5	3	5	3	977	108.9	4.69	0.0213578	0	0	0	0.0590522	0	0	0	0	0	0	0	0	0	0	0	0	0	0	0	0	0
CBBNIB_14270;CBBNIB_06215	hypothetical protein;hypothetical protein	0.023	1.882	2	1	2	1	404	44.8	4.44	0	0	0	0	0	0	0	0	0	0.0173235	0	0.0460172	0	0	0	0	0	0	0	0	0	0
CBBNIB_14235;CBBNIB_06250	Putative monooxygenase moxC;Putative monooxygenase moxC	0	29.315	30	8	17	8	443	49.4	4.64	0.0235515	0	0	0	0.0868231	0	0.027828	0	0	0.0631936	0	0.293762	0	0	0.0218733	0	0	0	0.0273368	0	0	0
CBBNIB_14165;CBBNIB_06320	hypothetical protein;hypothetical protein	0	10.981	9	2	5	2	568	58.2	4.16	0.0183685	0	0	0	0	0	0.0434078	0	0	0.0246433	0	0	0	0	0	0	0	0	0	0	0	0
CBBNIB_14160;CBBNIB_06325	hypothetical protein;hypothetical protein	0.001	3.402	11	1	1	1	268	29.8	4.42	0	0	0	0	0	0	0	0	0	0	0	0	0	0	0	0	0	0	0.0451873	0	0	0
CBBNIB_14135;CBBNIB_06350	hypothetical protein;hypothetical protein	0	8.723	6	3	6	3	656	73.3	4.53	0.0636177	0	0	0	0	0	0.0375848	0	0	0	0	0	0	0	0	0	0	0	0	0	0	0
CBBNIB_14125;CBBNIB_06360	hypothetical protein;hypothetical protein	0.001	3.64	4	1	2	1	337	36.4	4.98	0	0	0	0	0	0	0	0	0	0	0	0	0	0	0.0575068	0	0	0	0	0	0	0
CBBNIB_14105;CBBNIB_06380	Pyruvate dehydrogenase E1 component subunit alpha;Pyruvate dehydrogenase E1 component subunit alpha	0	14.332	17	3	4	3	367	40.7	4.54	0	0	0	0	0	0	0	0	0	0	0	0.101313	0	0	0.0528059	0	0	0	0	0	0	0
CBBNIB_14050;CBBNIB_06435	hypothetical protein;hypothetical protein	0	67.948	39	18	49	18	715	79.2	4.55	0.233473	0	0	0	0.537939	0	0.10345	0	0.114379	0.0391535	0	0.0260013	0	0	0	0	0	0	0	0	0	0
CBBNIB_14040;CBBNIB_06445	hypothetical protein;hypothetical protein	0.008	2.791	12	2	2	2	324	32.9	4.5	0	0	0	0	0	0	0	0	0	0	0	0.114759	0	0	0	0	0	0	0	0	0	0
CBBNIB_14005;CBBNIB_06480	hypothetical protein;hypothetical protein	0	5.491	16	3	5	3	374	39.8	4.06	0	0	0	0	0	0	0	0.17318	0.109333	0.0374262	0	0	0	0	0.0259088	0	0	0	0	0	0	0
CBBNIB_14000;CBBNIB_06485	hypothetical protein;hypothetical protein	0.021	1.933	3	1	1	1	740	77.7	6.04	0.0140991	0	0	0	0	0	0	0	0	0	0	0	0	0	0	0	0	0	0	0	0	0
CBBNIB_13765	hypothetical protein	0.021	2.132	7	1	1	1	206	22	4.54	0.0506471	0	0	0	0	0	0	0	0	0	0	0	0	0	0	0	0	0	0	0	0	0
CBBNIB_13745	hypothetical protein	0	28.118	38	7	48	7	233	23.9	5	0.313447	0	0	0	0.412689	0	0.105818	0	0	0.240298	0	0.319158	0	0	0.457463	0	0	0	0.571726	0	0	0
CBBNIB_13735	hypothetical protein	0	23.445	30	6	13	6	383	41.6	4.3	0.027241	0	0	0	0	0	0	0	0	0.21928	0	0	0	0	0	0	0	0	0	0	0	0
CBBNIB_13695	hypothetical protein	0.012	2.528	4	2	2	2	538	59.4	4.53	0	0	0	0	0	0	0.0229141	0	0	0.0130087	0	0	0	0	0	0	0	0	0	0	0	0
CBBNIB_13690	hypothetical protein	0.013	2.383	18	1	1	1	138	14.4	3.92	0	0	0	0	0	0	0	0	0	0	0	0	0	0	0	0	0	0	0.087755	0	0	0
CBBNIB_13685	hypothetical protein	0	6.027	15	2	16	2	218	22.8	4.25	0.0957184	0	0	0	0.0882171	0	0.113099	0	0	0.0642082	0	0.0852796	0	0	0.133347	0	0	0	0.277757	0	0	0
CBBNIB_13680	hypothetical protein	0	4.269	12	3	8	3	434	42.9	4.54	0.0480798	0	0	0	0.0886236	0	0	0.149238	0	0.016126	0	0	0	0	0.0223269	0	0	0	0.0279037	0	0	0
CBBNIB_13660	hypothetical protein	0	5.722	6	2	3	2	505	55.3	4.5	0	0	0	0	0	0	0	0	0	0.0415764	0	0	0	0	0	0	0	0	0	0	0	0
CBBNIB_13650	hypothetical protein	0	11.097	8	5	13	5	583	61.7	5.45	0.107375	0	0	0	0.0329868	0	0.0211455	0	0	0.0480185	0	0.0318884	0	0	0	0	0	0	0	0	0	0
CBBNIB_13605	hypothetical protein	0	4.488	9	2	3	2	427	45.4	4.41	0	0	0	0	0	0	0	0	0	0.0163904	0	0.0870771	0	0	0	0	0	0	0	0	0	0
CBBNIB_13580	hypothetical protein	0	25.356	23	7	10	7	495	52.5	4.55	0.0632322	0	0	0	0	0	0	0	0	0.0989714	0	0	0	0	0	0	0	0	0	0	0	0
CBBNIB_13570	hypothetical protein	0	6.228	4	1	1	1	661	69.2	4.59	0	0	0	0	0	0	0.0186502	0	0	0	0	0	0	0	0	0	0	0	0	0	0	0
CBBNIB_13555	hypothetical protein	0	12.655	5	3	20	3	652	69.9	4.61	0.048006	0	0	0	0.0294959	0	0.0756307	0	0.0627155	0.053671	0	0.0285137	0	0	0.0445854	0	0	0	0.0371478	0	0	0
CBBNIB_13550	hypothetical protein	0	4.155	14	2	4	2	154	17	8.84	0.0677488	0	0	0	0	0	0	0	0	0.0454461	0	0	0	0	0.0629214	0	0	0	0.0786376	0	0	0
CBBNIB_13545	Glutamate dehydrogenase	0	5.144	10	2	2	2	429	46.7	4.42	0.0243201	0	0	0	0	0	0	0	0	0.016314	0	0	0	0	0	0	0	0	0	0	0	0
CBBNIB_13520	hypothetical protein	0	115.689	48	15	221	15	565	58.4	4.23	0.480117	0.613636	0	0.417064	1.36151	0	1.9419	0.343909	3.40151	0.0867095	0	0.0329044	0	0.41099	0.0171502	0	0	0	0.042868	0	0	0
CBBNIB_13515	hypothetical protein	0	119.393	26	17	163	17	832	88.4	4.48	0.652082	0.208356	0	0	0.855239	0	0.414878	0.0778479	1.37612	0.0420595	0	0.134069	0	0.279098	0.046586	0	0	0	0	0	0	0
CBBNIB_13510	hypothetical protein	0	17.17	13	2	5	2	151	15	9.82	0.13819	0	0	0	0.25472	0	0	0	0	0	0	0.123119	0	0	0	0	0	0	0	0	0	0
CBBNIB_13505	hypothetical protein	0	4.551	12	2	5	2	260	28.5	4.15	0.0401281	0	0	0	0	0	0	0	0	0.0538361	0	0	0	0	0.0745376	0	0	0	0	0	0	0
CBBNIB_13500	hypothetical protein	0	15.379	7	3	12	3	832	93	6.16	0.0752402	0	0	0	0.0693437	0	0.0296341	0	0	0.00841189	0	0	0	0	0	0	0	0	0	0	0	0
CBBNIB_13480	hypothetical protein	0.001	3.37	7	2	3	2	249	27.6	4.53	0	0	0	0	0	0	0	0	0	0.0281072	0	0	0	0	0	0	0	0	0.0972707	0	0	0
CBBNIB_13470	Superoxide dismutase	0	7.795	10	1	3	1	199	22.4	4.42	0.104857	0	0	0	0	0	0	0	0	0.0351693	0	0	0	0	0	0	0	0	0	0	0	0
CBBNIB_13425	Isovaleryl-CoA dehydrogenase (Leucine degradation)	0	11.764	11	2	4	2	382	41.6	4.46	0.0273123	0	0	0	0	0	0	0	0	0.0183212	0	0.0973349	0	0	0	0	0	0	0	0	0	0
CBBNIB_13415	hypothetical protein	0	12.443	22	4	15	4	254	26.9	4.32	0.082152	0	0	0	0	0	0	0	0	0.0551078	0	0	0	0	0.152597	0	0	0	0.333746	0	0	0
CBBNIB_13410	hypothetical protein	0	7.362	20	3	7	3	259	27.9	4.69	0.0805661	0	0	0	0	0	0	0	0	0.054044	0	0	0	0	0.0748254	0	0	0	0.0467575	0	0	0
CBBNIB_13405	hypothetical protein	0	36.623	27	7	32	7	393	41.5	9.64	0.37167	0	0	0	0.195739	0	0.125474	0	0	0.0534251	0	0.0946105	0	0	0.0986248	0	0	0	0.0308147	0	0	0
CBBNIB_13395	hypothetical protein	0	73.734	23	5	90	5	433	45.4	3.8	0.0963816	0	0	0	0.0888283	0	0.341648	0.149583	0.283306	0.985959	1.65032	0.0429353	0	0	0.0671355	0	0	0	0.0559362	0	0	0
CBBNIB_13380	aldehyde dehydrogenase (NAD(+))	0	4.136	6	2	3	2	506	55.6	4.53	0.0206192	0	0	0	0	0	0	0	0	0.0276628	0	0	0	0	0	0	0	0	0	0	0	0
CBBNIB_13370	hypothetical protein	0.001	3.622	16	2	4	2	265	29	4.6	0	0	0	0	0	0	0	0	0	0	0	0	0	0	0	0	0	0	0.182795	0	0	0
CBBNIB_13365	hypothetical protein	0.047	1.466	5	1	1	1	351	37.3	4.79	0	0	0	0	0	0	0	0	0	0	0	0	0	0	0.0276065	0	0	0	0	0	0	0
CBBNIB_13335	hypothetical protein	0	5.198	7	1	2	1	309	31.7	5.36	0	0	0	0	0	0	0.0797916	0	0	0	0	0	0	0	0	0	0	0	0	0	0	0
CBBNIB_13320	NMT1 domain-containing protein	0	197.808	83	13	256	13	325	35.1	4.26	0.25682	1.06678	0	5.8004	0.414213	0	0.151727	0	0.125817	0.0861378	0	0.286015	0	0	0.924267	0	0.728608	0	6.85623	0	0	0
CBBNIB_13315	ABC transporter permease protein	0	8.045	10	2	6	2	266	27.7	6.57	0.117669	0	0	0	0	0	0	0	0	0.0263109	0	0.139782	0	0	0	0	0	0	0	0	0	0
CBBNIB_13310	Aliphatic sulfonates import ATP-binding protein SsuB	0	21.78	17	4	16	4	259	27.5	4.37	0.120849	0	0	0	0.222757	0	0	0	0	0.108088	0	0.0717798	0	0	0.0748254	0	0	0	0.140273	0	0	0
CBBNIB_13300	Acetolactate synthase	0	7.003	7	3	8	3	601	63.4	4.22	0.0173599	0	0	0	0.0319989	0	0.102561	0	0	0.0116451	0	0	0	0	0	0	0	0	0	0	0	0
CBBNIB_13295	hypothetical protein	0.001	3.454	4	1	1	1	220	23.2	4.56	0	0	0	0	0	0	0	0	0	0.0318122	0	0	0	0	0	0	0	0	0	0	0	0
CBBNIB_13290	Ketol-acid reductoisomerase (NADP(+))	0	4.533	5	1	2	1	352	38	4.15	0.0296401	0	0	0	0	0	0	0	0	0.0198827	0	0	0	0	0	0	0	0	0	0	0	0
CBBNIB_13285	hypothetical protein	0.034	1.622	2	1	1	1	473	51.3	4.54	0	0	0	0	0	0	0	0	0	0.0147964	0	0	0	0	0	0	0	0	0	0	0	0
CBBNIB_13275	NAD-dependent isocitrate dehydrogenase	0	4.347	5	1	4	1	332	34.4	4.22	0	0	0	0	0	0	0	0	0	0	0	0.167991	0	0	0.0291864	0	0	0	0	0	0	0
CBBNIB_13265	hypothetical protein	0.001	3.768	13	1	2	1	179	18.9	4.25	0	0	0	0	0	0	0	0	0	0.0781977	0	0	0	0	0	0	0	0	0	0	0	0
CBBNIB_13250	hypothetical protein	0	96.732	47	19	49	19	587	65.2	4.51	0.195513	0.590637	0	0	0.0327621	0	0.0420027	0	0	0.38153	0	0	0	0	0	0	0	0	0	1.07573	0	0
CBBNIB_13230	hypothetical protein	0	35.014	18	7	22	7	593	60.5	4.44	0.123159	0	0	0	0.0648611	0	0.0415778	0	0	0.10622	0	0	0	0	0.0326809	0	0	0	0	0	0	0
CBBNIB_13225	hypothetical protein	0	11.677	26	4	15	4	242	24.8	4.26	0.258677	0	0	0	0.238405	0	0.101883	0	0	0.0578404	0	0	0	0	0.0800817	0	0	0	0	0	0	0
CBBNIB_13185	hypothetical protein	0.007	2.869	5	1	1	1	349	36.8	4.08	0	0	0	0	0	0	0	0	0	0.0200536	0	0	0	0	0	0	0	0	0	0	0	0
CBBNIB_13155	hypothetical protein	0	8.498	7	3	5	3	518	56.7	4.5	0.0604246	0	0	0	0	0	0	0	0	0.027022	0	0	0	0	0	0	0	0	0	0	0	0
CBBNIB_13150	hypothetical protein	0	39.942	40	9	22	9	459	48.1	4.65	0.204575	0	0	0	0.0418983	0	0	0	0	0.0152477	0	0.445535	0	0	0	0	0	0	0	0	0	0
CBBNIB_13145	hypothetical protein	0	7.942	6	2	8	2	592	64	4.63	0.0528715	0	0	0	0.0324853	0	0.062472	0	0	0.0118221	0	0	0	0	0	0	0	0	0	0	0	0
CBBNIB_13140	Glycerol kinase	0	64.62	38	13	61	13	512	56.8	4.36	0.0203776	0	0	0	0.0375612	0	0	0	0	0.792821	0	0	0	0	0.0189256	0	0	0	0	0	0	0
CBBNIB_13130	hypothetical protein	0.047	1.473	3	1	1	1	389	41.9	5.29	0	0	0	0	0	0	0	0	0	0	0	0.0477917	0	0	0	0	0	0	0	0	0	0
CBBNIB_13095	hypothetical protein	0	33.289	32	8	12	8	483	49.9	4.46	0	0	0	0	0	0	0	0	0	0.173881	0	0	0	0	0	0	0	0	0	0	0	0
CBBNIB_13090	hypothetical protein	0.001	3.714	6	1	4	1	159	14.9	4.35	0.0656183	0	0	0	0.120952	0	0	0	0	0.0440169	0	0	0	0	0.0609427	0	0	0	0	0	0	0
CBBNIB_13080	hypothetical protein	0	28.776	40	6	15	6	210	22.6	4.15	0.248412	0	0	0	0	0	0.176112	0	0	0.0666542	0	0	0	0	0.138427	0	0	0	0.115335	0	0	0
CBBNIB_13040	Anthranilate phosphoribosyltransferase	0	4.051	17	2	2	2	349	35.5	4.21	0.0298949	0	0	0	0	0	0	0	0	0	0	0	0	0	0	0	0	0	0.0346997	0	0	0
CBBNIB_13020	hypothetical protein	0	4.925	8	1	2	1	242	25.5	4.81	0.0431128	0	0	0	0	0	0	0	0	0	0	0	0	0	0	0	0	0	0.0500421	0	0	0
CBBNIB_13015	hypothetical protein	0.033	1.673	9	1	1	1	138	15.2	4.3	0	0	0	0	0	0	0	0	0	0.0507152	0	0	0	0	0	0	0	0	0	0	0	0
CBBNIB_13005	hypothetical protein	0	5.956	8	2	4	2	412	45.3	4.32	0.0253236	0	0	0	0	0	0	0	0	0.0509614	0	0	0	0	0	0	0	0	0	0	0	0
CBBNIB_12990	hypothetical protein	0.021	2	5	1	1	1	338	36.2	5.58	0.0308678	0	0	0	0	0	0	0	0	0	0	0	0	0	0	0	0	0	0	0	0	0
CBBNIB_12965	hypothetical protein	0	8.304	6	2	12	2	203	22.8	4.48	0.102791	0	0	0	0.0947356	0	0.121456	0	0	0.0344763	0	0.0915811	0	0	0.0954669	0	0	0	0.178968	0	0	0
CBBNIB_12950	Superoxide dismutase	0	7.795	10	1	3	1	199	22.8	4.42	0.104857	0	0	0	0	0	0	0	0	0.0351693	0	0	0	0	0	0	0	0	0	0	0	0
CBBNIB_12935	hypothetical protein	0.035	1.598	14	1	2	1	160	18	4.46	0	0	0	0	0	0	0	0	0	0.0874837	0	0	0	0	0	0	0	0	0	0	0	0
CBBNIB_12920	hypothetical protein	0.004	3.129	9	2	2	2	275	28	4.69	0	0	0	0	0	0	0	0	0	0.0508996	0	0	0	0	0	0	0	0	0	0	0	0
CBBNIB_12890	hypothetical protein	0.013	2.358	7	1	1	1	310	32.1	4.5	0	0	0	0	0	0	0	0	0	0.0225764	0	0	0	0	0	0	0	0	0	0	0	0
CBBNIB_12885	hypothetical protein	0	9.014	7	2	3	2	512	54.3	4.79	0.0611327	0	0	0	0	0	0	0	0	0	0	0	0	0	0	0	0	0	0	0	0	0
CBBNIB_12880	Alcohol dehydrogenase (Acceptor)	0	63.164	41	14	46	14	540	58.5	4.69	0.115926	0	0	0	0	0	0.159805	0	0	0.414737	0	0.0344277	0	0	0	0	0	0	0	0	0	0
CBBNIB_12870	hypothetical protein	0	33.709	40	9	12	9	425	43.9	4.56	0	0	0	0	0	0	0	0	0	0.19761	0	0	0	0	0	0	0	0	0	0	0	0
CBBNIB_12865	hypothetical protein	0	4.794	7	3	5	3	679	71.1	4.58	0	0	0	0	0	0	0.0726233	0	0	0	0	0	0	0	0	0	0	0	0.0178353	0	0	0
CBBNIB_12830	hypothetical protein	0	5.626	7	1	2	1	361	40	4.54	0	0	0	0	0	0	0	0	0	0	0	0.102997	0	0	0	0	0	0	0	0	0	0
CBBNIB_12815	hypothetical protein	0	5.96	12	1	1	1	258	26.9	4.4	0	0	0	0	0	0	0	0	0	0	0	0	0	0	0	0	0	0	0.0469387	0	0	0
CBBNIB_12810	hypothetical protein	0	9.322	9	3	6	3	498	54.4	4.79	0.0209504	0	0	0.473175	0	0	0	0	0	0.0421608	0	0	0	0	0	0	0	0	0.0243177	0	0	0
CBBNIB_12790	hypothetical protein	0	9.798	11	4	5	4	491	53.5	5.21	0.0212491	0	0	0	0	0	0	0	0	0.0570158	0	0	0	0	0	0	0	0	0	0	0	0
CBBNIB_12775	hypothetical protein	0	10.555	7	4	10	4	1016	109.4	4.59	0.041076	0	0	0	0.0567854	0	0	0	0	0.0206654	0	0	0	0	0	0	0	0	0	0	0	0
CBBNIB_12770	hypothetical protein	0.011	2.687	9	1	1	1	203	20	4.36	0.0513956	0	0	0	0	0	0	0	0	0	0	0	0	0	0	0	0	0	0	0	0	0
CBBNIB_12765	hypothetical protein	0	23.714	13	6	16	6	756	81	4.46	0.0552027	0	0	0	0.0763148	0	0.0815331	0	0	0.0185151	0	0	0	0	0.0256346	0	0	0	0	0	0	0
CBBNIB_12760	hypothetical protein	0.037	1.564	13	1	1	1	104	11.2	4.17	0.10032	0	0	0	0	0	0	0	0	0	0	0	0	0	0	0	0	0	0	0	0	0
CBBNIB_12745	hypothetical protein	0	25.949	26	3	18	3	231	24.9	4.67	0.135498	0	0	0	0.166505	0	0.106734	0	0	0.121189	0	0.0804804	0	0	0.125843	0	0	0	0.157275	0	0	0
CBBNIB_12730	hypothetical protein	0	6.239	8	2	9	2	314	31.6	7.2	0.166135	0	0	0	0.122493	0	0.0785211	0	0	0	0	0	0	0	0	0	0	0	0	0	0	0
CBBNIB_12725	hypothetical protein	0	152.399	20	13	208	13	1055	114	4.4	1.12739	0	0	0.223357	1.42184	0	0.0467405	0	0	0.0265353	0	0.0176218	0	0	0.0551084	0	0	0	0	0	0	0
CBBNIB_12720	hypothetical protein	0.022	2.187	3	1	2	1	312	35.1	4.65	0.0334401	0	0	0	0	0	0	0	0	0	0	0	0	0	0.0310573	0	0	0	0	0	0	0
CBBNIB_12710	hypothetical protein	0	8.856	13	3	19	3	250	28.8	4.92	0.292133	0	0	0	0.230776	0	0.0986224	0	0	0.0559895	0	0.148728	0	0	0.0387596	0	0	0	0.0968816	0	0	0
CBBNIB_12705	hypothetical protein	0.001	3.291	8	1	1	1	274	30.6	5.19	0.0380778	0	0	0	0	0	0	0	0	0	0	0	0	0	0	0	0	0	0	0	0	0
CBBNIB_12700	hypothetical protein	0	11.877	20	5	12	5	327	37	4.86	0.0319061	0	0	0	0.0588114	0	0	0	0	0.0428055	0	0.0568531	0	0	0.177796	0.229366	0	0	0	0	0	0
CBBNIB_12695	hypothetical protein	0	40.994	35	11	34	11	390	44.2	5.48	0.214017	0	0	0	0.0493111	0	0.0948293	0	0	0.125618	0	0.190677	0	0	0.248459	0	0	0	0.0310518	0	0	0
CBBNIB_12690	hypothetical protein	0	42.514	25	6	22	6	312	36	4.87	0.334401	0	0	0	0.123278	0	0.118537	0	0	0.0224317	0	0	0	0	0.124229	0	0	0	0.0776295	0	0	0
CBBNIB_12685	hypothetical protein	0.04	1.531	3	1	2	1	467	50.9	7.96	0	0	0	0	0	0	0.0263979	0	0	0.0149865	0	0	0	0	0	0	0	0	0	0	0	0
CBBNIB_12680	UTP--glucose-1-phosphate uridylyltransferase	0	34.682	46	6	22	6	260	28.9	4.51	0	0	0	0	0.147933	0	0.0474146	0	0	0.0269181	0	0	0	0	0.111806	0	0	0	0.698665	0	0	0
CBBNIB_12675	UDP-glucuronate decarboxylase	0	12.055	15	5	5	5	310	34.8	5	0	0	0	0	0	0	0	0	0	0	0	0	0	0	0.156289	0	0	0	0	0	0	0
CBBNIB_12670	hypothetical protein	0	12.028	9	2	15	2	306	33.8	4.41	0.136383	0	0	0	0.125695	0	0	0	0	0.0457431	0	0.243019	0	0	0.0633326	0	0	0	0.0395758	0	0	0
CBBNIB_12665	hypothetical protein	0	24.448	28	8	13	8	434	46.1	4.3	0	0	0	0	0	0	0.0284051	0	0	0.193512	0	0	0	0	0	0	0	0	0	0	0	0
CBBNIB_12630	hypothetical protein	0.007	2.915	2	1	2	1	634	66.2	4.69	0.0329126	0	0	0	0	0	0	0	0	0	0	0	0	0	0	0	0	0	0	0	0	0
CBBNIB_12625	hypothetical protein	0	5.749	11	1	5	1	149	15	9.96	0.350111	0	0	0	0	0	0	0	0	0	0	0	0	0	0	0	0	0	0	0	0	0
CBBNIB_12605	hypothetical protein	0	10.765	13	3	10	3	344	35.3	4.53	0.0303294	0	0	0	0	0	0	0	0	0.0406901	0	0	0	0	0.140841	0	0	0	0.0704081	0	0	0
CBBNIB_12600	hypothetical protein	0	28.743	13	8	31	8	675	67.4	5	0.293678	0	0	0	0.113963	0	0.0182634	0	0	0.0518422	0	0.0275422	0	0	0.0143554	0	0	0	0	0	0	0
CBBNIB_12595	hypothetical protein	0	23.412	35	8	19	8	339	36.8	4.55	0.0923302	0	0	0	0	0	0.0363652	0	0	0.0206451	0	0	0	0	0.285837	0	0	0	0.142893	0	0	0
CBBNIB_12590	hypothetical protein	0	8.803	13	3	4	3	286	30.3	4.89	0.10944	0	0	0	0	0	0	0	0	0	0	0	0	0	0.0338807	0	0	0	0	0	0	0
CBBNIB_12545	hypothetical protein	0	32.22	29	11	20	11	518	53.6	4.59	0.0201415	0	0	0	0	0	0.0237989	0	0	0.243198	0	0	0	0	0	0	0	0	0	0	0	0
CBBNIB_12540	hypothetical protein	0	212.763	36	9	501	9	393	40.6	3.93	0.212383	0	12.2291	1.79879	0.587216	0	1.72527	0.494423	0.104047	6.55348	27.2744	0.614968	3.53095	1.18173	0.19725	0	0	0	0.184888	1.60675	0	0
CBBNIB_12535	Galactose/methyl galactoside import ATP-binding protein MglA	0	117.552	53	18	73	18	538	57.6	4.44	0.252106	0.644431	0	0	0.0714919	0	0.0916565	0	0	0.624419	0	0	0	0.431616	0	0	0	0	0.067529	0	0	0
CBBNIB_12530	hypothetical protein	0	13.353	9	4	36	4	432	44.3	4.65	0.265663	0	0	0	0.267102	0	0.142683	0	0	0.0810034	0	0.0860693	0	0	0.0897212	0	0	0	0.0840986	0	0	0
CBBNIB_12525	hypothetical protein	0	24.248	12	3	50	3	350	35.7	5.33	0.447142	0.495292	0	0	0.384627	0	0.281778	0	0.11683	0.0999813	0	0.265585	0	0	0.0830562	0	0	0	0.173003	0	0	0
CBBNIB_12515	hypothetical protein	0	55.763	48	11	34	11	456	49.4	4.55	0.1144	0	0	0	0.168696	0	0.162208	0	0	0.107436	0	0.366927	0	0.509231	0	0	0	0	0.0531149	0	0	0
CBBNIB_12500	hypothetical protein	0	6.21	8	2	2	2	426	45.5	4.51	0.0244913	0	0	0	0	0	0	0	0	0.0164289	0	0	0	0	0	0	0	0	0	0	0	0
CBBNIB_12475	hypothetical protein	0	11.847	12	4	5	4	526	54.5	5.11	0.0793407	0	0	0	0	0	0	0	0	0.0133055	0	0	0	0	0	0	0	0	0	0	0	0
CBBNIB_12465	hypothetical protein	0	49.852	23	11	59	11	570	61.4	4.96	0.530817	0	0	0	0.303653	0	0.108139	0	0.143476	0.110506	0	0.0326157	0	0	0.0679992	0	0	0	0	0	0	0
CBBNIB_12455	hypothetical protein	0	6.427	5	1	1	1	256	29.8	4.41	0	0	0	0	0	0	0	0	0	0	0	0	0	0	0.0378511	0	0	0	0	0	0	0
CBBNIB_12450	hypothetical protein	0	29.817	11	5	9	5	898	97.8	4.63	0.0580919	0	0	0	0.0642472	0	0.0137281	0	0	0	0	0	0	0	0	0	0	0	0	0	0	0
CBBNIB_12435	hypothetical protein	0.001	3.517	6	1	2	1	250	26.5	4.06	0	0	0	0	0	0	0	0	0	0.0279948	0	0	0	0	0.0387596	0	0	0	0	0	0	0
CBBNIB_12405	hypothetical protein	0.014	2.319	5	2	2	2	736	79.3	4.28	0	0	0	0	0.052259	0	0	0	0	0	0	0	0	0	0	0	0	0	0	0	0	0
CBBNIB_12390	METMALONYL-COA-MUTASE domain-containing protein	0.012	2.54	5	2	3	2	557	62.1	4.4	0	0	0	0	0	0	0.0663975	0	0	0	0	0	0	0	0	0	0	0	0	0	0	0
CBBNIB_12380	hypothetical protein	0.001	3.49	3	2	4	2	870	96.6	4.51	0.0119923	0	0	0	0.0663149	0	0	0	0	0	0	0	0	0	0	0	0	0	0	0	0	0
CBBNIB_12375	hypothetical protein	0	12.028	9	2	15	2	306	33.5	4.41	0.136383	0	0	0	0.125695	0	0	0	0	0.0457431	0	0.243019	0	0	0.0633326	0	0	0	0.0395758	0	0	0
CBBNIB_12360	hypothetical protein	0	4.828	13	1	15	1	87	9.2	5.15	0.599615	0	0	0	0.22105	0	0.283398	0	0	0.160889	0	0	0	0	0.222756	0	0	0	0.278395	0	42.9134	0
CBBNIB_12355	Sacchrp-dh-NADP domain-containing protein	0	4.049	10	2	5	2	427	44.6	4.77	0.024434	0	0	0	0	0	0	0	0	0	0	0.174154	0	0	0	0	0	0	0	0	0	0
CBBNIB_12345	hypothetical protein	0	66.768	46	11	82	11	447	49.8	4.26	0.443474	0	0	0	0.430231	0	0.193053	0	0	0.688909	0	0	0	0	0.0433552	0	0	0	0	0	0	0
CBBNIB_12325	hypothetical protein	0	3.936	5	2	19	2	333	34.8	9.17	0.156656	0	0	0	0.173255	0	0.0740409	0	0	0.0420342	0	0.223315	0	0	0.0290988	0	0	0	0.0727339	0	0	0
CBBNIB_12305	Crotonase	0	30.596	38	7	16	7	258	27.1	4.31	0.0404392	0	0	0	0	0	0	0	0	0	0	0	0	0	0.112673	0	0	0	0.563265	0	0	0
CBBNIB_12300	hypothetical protein	0	4.499	12	1	1	1	189	20.8	4.31	0	0	0	0	0.101753	0	0	0	0	0	0	0	0	0	0	0	0	0	0	0	0	0
CBBNIB_12285	hypothetical protein	0	8.212	26	4	6	4	324	35.5	4.03	0	0	0	0	0	0	0	0	0	0	0	0.286898	0	0	0	0.23149	0	0	0	0	0	0
CBBNIB_12275	hypothetical protein	0	6.692	7	2	4	2	488	52.1	4.46	0.0641392	0	0	0	0	0	0	0	0	0	0	0.0380962	0	0	0	0	0	0	0	0	0	0
CBBNIB_12270	hypothetical protein	0	56.687	17	12	71	12	897	93.6	5.31	0.407097	0	0	0	0.214396	0	0.137434	0	0.227929	0.0546163	0	0.0414514	0	0	0.0108026	0	0	0	0.0135008	0	0	0
CBBNIB_12260	hypothetical protein	0	236.768	55	7	197	7	325	34.2	4.01	0.192615	1.06678	0	6.52545	0.53256	0	0.151727	0	0.125817	0.538361	0	5.94911	6.4046	3.57245	0.447226	0.461555	0	0	0.447146	0	0	0
CBBNIB_12210	Threonine--tRNA ligase	0	5.16	2	1	1	1	649	73.8	4.39	0	0	0	0	0	0	0.0189951	0	0	0	0	0	0	0	0	0	0	0	0	0	0	0
CBBNIB_12195	hypothetical protein	0.001	3.48	6	1	4	1	199	21.9	4.86	0.104857	0	0	0	0.0966398	0	0	0	0	0.0351693	0	0	0	0	0	0	0	0	0	0	0	0
CBBNIB_12080	hypothetical protein	0.037	1.566	17	1	3	1	102	10.6	4.12	0.102287	0	0	0	0.188542	0	0.120861	0	0	0	0	0	0	0	0	0	0	0	0	0	0	0
CBBNIB_12045	hypothetical protein	0.001	3.848	9	1	1	1	267	27.9	4.44	0	0	0	0	0	0	0	0	0	0	0	0	0	0	0	0	0	0	0.0453565	0	0	0
CBBNIB_12000	Amidohydro-rel domain-containing protein	0	7.517	5	2	7	2	396	43.2	4.67	0	0	0	0	0	0	0	0	0	0.0353469	0	0.187788	0	0	0.0244694	0	0	0	0	0	0	0
CBBNIB_11990	hypothetical protein	0.014	2.326	4	2	2	2	963	108.1	4.7	0.0108342	0	0	0	0.0199702	0	0	0	0	0	0	0	0	0	0	0	0	0	0	0	0	0
CBBNIB_11985	hypothetical protein	0	28.808	15	8	84	8	462	48.5	4.84	0.609739	0	0	0.510046	0.374636	0	0.213469	0	0	0.212082	0	0.0402402	0	0	0.230712	0	0	0	0.340763	0	0	0
CBBNIB_11935	hypothetical protein	0.021	1.965	11	1	1	1	132	14	4.03	0.0790402	0	0	0	0	0	0	0	0	0	0	0	0	0	0	0	0	0	0	0	0	0
CBBNIB_11925	hypothetical protein	0	4.9	19	2	12	2	240	25.6	4.23	0	0	0	0	0	0	0	0	0	0	0	0	0	0	0.484495	0	0	0	0	0	0	0
CBBNIB_11870	hypothetical protein	0	5.158	7	2	7	2	255	26.9	7.28	0.122745	0	0	0	0	0	0.0483443	0	0	0.0548917	0	0	0	0	0.0379996	0	0	0	0	0	0	0
CBBNIB_11850	hypothetical protein	0	95.407	36	16	137	16	752	79.7	4.39	0.665956	0.230521	0	0	0.613766	0	0.213114	0	0.815635	0.139602	0	0.12361	0	0	0.154626	0	0	0	0.0644159	0	0	0
CBBNIB_11845	hypothetical protein	0	11.169	35	2	6	2	91	10.5	4.7	0.343955	0	0	0	0	0	0	0	0	0.153817	0	0	0	0	0.106482	0	0	0	0	0	0	0
CBBNIB_11840	hypothetical protein	0	53.069	43	12	27	12	473	50.9	4.51	0.0661732	0	0	0	0	0	0.026063	0	0	0.325521	0	0	0	0	0.020486	0	0	0	0	0	0	0
CBBNIB_11790	Short-chain dehydrogenase	0	25.211	22	6	28	6	356	38.2	4.75	0.117228	0	0	0	0.0540206	0	0.0346287	0	0.114861	0.0393185	0	0.678883	0	0	0.108875	0	0	0	0.0680348	0	0	0
CBBNIB_11775	hypothetical protein	0	22.188	7	4	18	4	890	92.7	4.48	0.0586141	0	0	0	0.0432165	0	0.0415544	0	0	0.0078637	0	0.0208887	0	0	0.021775	0	0	0	0.0544278	0	0	0
CBBNIB_11770	hypothetical protein	0.007	2.885	6	1	2	1	218	23.2	5.14	0	0	0	0	0	0	0	0	0	0.0321041	0	0	0	0	0.044449	0	0	0	0	0	0	0
CBBNIB_11760	hypothetical protein	0	17.083	31	4	31	4	153	16.7	4.78	0.545532	0	0	0	0.50278	0	0.0805739	0	0	0.320202	0	0.12151	0	0	0.379996	0	0	0	0.316606	0	0	0
CBBNIB_11755	hypothetical protein	0	31.224	10	7	85	7	594	62.4	4.5	0.281032	0.291838	0	0	0.226632	0	0.166031	0.218079	0	0.200299	0	0.125192	0	0	0.358885	0	0	0	0.1631	0	0	0
CBBNIB_11745	hypothetical protein	0	21.053	14	6	23	6	674	75.2	4.27	0.0773984	0	0	0	0.199732	0	0.146324	0	0	0.0103838	0	0.027583	0	0	0.0143767	0	0	0	0	0	0	0
CBBNIB_11740	hypothetical protein	0.033	1.67	2	1	1	1	583	61.5	4.7	0.0178959	0	0	0	0	0	0	0	0	0	0	0	0	0	0	0	0	0	0	0	0	0
CBBNIB_11710	hypothetical protein	0	4.671	6	2	2	2	511	58.2	4.31	0	0	0	0	0	0	0	0	0	0.0273921	0	0	0	0	0	0	0	0	0	0	0	0
CBBNIB_11705	hypothetical protein	0	9.019	15	3	3	3	390	42.2	4.35	0	0	0	0	0	0	0	0	0	0.0538361	0	0	0	0	0	0	0	0	0	0	0	0
CBBNIB_11660	hypothetical protein	0	6.065	9	2	12	2	258	26.8	4.4	0.0808784	0	0	0	0.14908	0	0.0477822	0	0	0.0542534	0	0.072058	0	0	0.0751154	0	0	0	0.0938775	0	0	0
CBBNIB_11655	hypothetical protein	0	4.607	2	1	5	1	474	48.5	4.73	0.0440224	0	0	0	0	0	0	0	0	0.0147652	0	0	0	0	0.0204428	0	0	0	0.0255489	0	0	0
CBBNIB_11650	hypothetical protein	0.005	3.019	5	1	2	1	204	22.8	4.46	0.102287	0	0	0	0	0	0	0	0	0	0	0	0	0	0	0	0	0	0	0	0	0
CBBNIB_11625	hypothetical protein	0	7.817	14	3	3	3	352	38.1	4.88	0	0	0	0	0	0	0	0	0	0	0	0	0	0	0.0825843	0	0	0	0	0	0	0
CBBNIB_11600	hypothetical protein	0	10.628	16	4	4	4	326	35.8	4.64	0	0	0	0	0	0	0	0	0	0	0	0	0	0	0.118894	0	0	0	0	0	0	0
CBBNIB_11565	hypothetical protein	0.023	1.87	2	1	1	1	596	63.5	4.34	0.0175056	0	0	0	0	0	0	0	0	0	0	0	0	0	0	0	0	0	0	0	0	0
CBBNIB_11545	hypothetical protein	0.012	2.512	5	1	2	1	220	22.4	4.88	0	0	0	0	0	0	0	0	0	0	0	0.0845044	0	0	0	0	0	0	0.0550463	0	0	0
CBBNIB_11540	hypothetical protein	0.001	3.801	3	2	2	2	394	42.2	4.39	0.0264805	0	0	0	0.0488105	0	0	0	0	0	0	0	0	0	0	0	0	0	0	0	0	0
CBBNIB_11530	hypothetical protein	0	12.672	13	5	8	5	485	48.9	4.49	0	0	0	0	0	0	0	0	0	0.115442	0	0	0	0	0	0	0	0	0	0	0	0
CBBNIB_11520	hypothetical protein	0	13.031	12	5	8	5	555	60.5	4.81	0.0939938	0	0	0	0	0	0	0	0	0.0378308	0	0	0	0	0	0	0	0	0	0	0	0
CBBNIB_11505	hypothetical protein	0	7.425	7	3	5	3	380	38.5	7.44	0.109824	0	0	0	0	0	0	0	0	0.0184176	0	0	0	0	0	0	0	0	0	0	0	0
CBBNIB_11500	hypothetical protein	0	4.875	18	3	3	3	288	32.7	4.49	0.0362268	0	0	0	0	0	0	0	0	0	0	0	0	0	0.0672909	0	0	0	0	0	0	0
CBBNIB_11495	hypothetical protein	0.013	2.344	3	1	1	1	350	38.9	4.96	0	0	0	0	0	0	0	0	0	0	0	0	0	0	0.0276854	0	0	0	0	0	0	0
CBBNIB_11485	hypothetical protein	0	13.886	25	2	2	2	258	26.8	4.18	0	0	0	0	0	0	0	0	0	0	0	0	0	0	0	0	0	0	0.0938775	0	0	0
CBBNIB_11475	hypothetical protein	0	5.796	3	1	2	1	452	49.1	4.4	0	0	0	0	0	0	0	0	0	0.0309677	0	0	0	0	0	0	0	0	0	0	0	0
CBBNIB_11465	hypothetical protein	0	55.787	24	8	36	8	635	68.2	3.8	0.115013	0.272995	0	0	0.211999	0	0.155311	0	0.257578	0.0661294	0	0.0292771	0	0	0.0152597	0	0	0	0.0190712	0	0	0
CBBNIB_11410	hypothetical protein	0	28.06	35	5	11	5	330	34.9	4.98	0	0	0	0	0	0	0	0	0	0.0212082	0	0	0	0	0.0880899	0	0	0	0.256883	0	0	0
CBBNIB_11390	hypothetical protein	0	4.378	6	1	1	1	372	38.6	4.53	0	0	0	0	0	0	0	0	0	0.0188137	0	0	0	0	0	0	0	0	0	0	0	0
CBBNIB_11360	hypothetical protein	0	14.027	20	4	12	4	257	28.1	4.32	0	0	0	0	0	0	0	0	0	0.0816968	0	0	0	0	0.150815	0	0	0	0.235607	0	0	0
CBBNIB_11350	hypothetical protein	0	37.559	67	11	30	11	288	30.7	4.63	0.0362268	0	0	0	0.200326	0	0.0856098	0	0	0.0729031	0	0.839175	0	0	0.100936	0	0	0	0.210246	0	0	0
CBBNIB_11340	hypothetical protein	0	12.772	11	5	13	5	641	71.5	4.74	0.0651064	0	0	0	0.0300021	0	0.134625	0	0	0.0109184	0	0	0	0	0	0	0	0	0	0	0	0
CBBNIB_11335	N-methylhydantoinase B	0.012	2.476	4	2	2	2	541	56.6	4.51	0	0	0	0	0	0	0	0	0	0.0258732	0	0	0	0	0	0	0	0	0	0	0	0
CBBNIB_11280	hypothetical protein	0.001	3.639	12	2	3	2	162	17	4.73	0.0644031	0	0	0	0	0	0	0	0	0.0432018	0	0.114759	0	0	0	0	0	0	0	0	0	0
CBBNIB_11275	hypothetical protein	0	6.505	11	2	5	2	334	35.4	4.4	0	0	0	0	0	0	0	0	0	0.104771	0	0	0	0	0	0	0	0	0	0	0	0
CBBNIB_11270	hypothetical protein	0	4.719	12	1	4	1	211	22.1	4.17	0	0	0	0	0	0	0	0	0	0.0663383	0	0	0	0	0.0918473	0	0	0	0	0	0	0
CBBNIB_11260	hypothetical protein	0	20.65	13	6	11	6	674	73.1	4.75	0.0928781	0	0	0	0	0	0	0	0	0.0415353	0	0	0	0	0	0	0	0	0.0179677	0	0	0
CBBNIB_11255	hypothetical protein	0	25.108	9	8	19	7	1368	147.6	4.09	0.0915203	0	0	0	0.028116	0	0.00901155	0	0	0.020464	0	0	0	0	0	0	0	0	0	0	0	0
CBBNIB_11225	hypothetical protein	0	102.46	55	13	126	13	313	35.5	5.47	0.433332	0	0	0.752848	0.430094	0	0.354474	0	0	0.447201	0	0.653357	0	0	0.897785	0	0	0	1.39287	0	0	0
CBBNIB_11220	hypothetical protein	0.001	3.428	7	3	5	3	682	75.1	4.49	0	0	0	0	0.0281984	0	0.018076	0	0	0	0	0.054519	0	0	0	0	0	0	0.0177569	0	0	0
CBBNIB_11200	hypothetical protein	0.001	3.532	3	1	2	1	403	41.6	4.5	0	0	0	0	0	0	0	0	0	0	0	0.0922628	0	0	0	0	0	0	0	0	0	0
CBBNIB_11190	hypothetical protein	0	22.267	28	6	10	6	397	42.2	4.39	0.0262804	0	0	0	0	0	0.0310524	0	0	0.0528868	0	0.234143	0	0	0	0	0	0	0	0	0	0
CBBNIB_11180	hypothetical protein	0	6.194	13	3	6	3	312	33.1	4.03	0	0	0	0	0	0	0	0	0	0.0224317	0	0.238346	0	0	0.0310573	0	0	0	0	0	0	0
CBBNIB_11165	hypothetical protein	0.001	3.645	10	1	1	1	236	24.9	4.93	0	0	0	0	0	0	0	0	0	0	0	0	0	0	0.0410589	0	0	0	0	0	0	0
CBBNIB_11160	hypothetical protein	0	12.759	21	4	13	4	280	30.6	4.86	0.0372618	0	0	0	0.0686833	0	0.0440279	0	0	0.0499907	0	0.0663963	0	0	0.10382	0	0	0	0.173003	0	0	0
CBBNIB_11150	hypothetical protein	0	30.615	18	9	60	9	700	76.7	4.55	0.223571	0	0	0	0.219787	0	0.440279	0.0925278	0.058415	0.0299944	0	0.053117	0	0	0.0692135	0	0	0	0	0	0	0
CBBNIB_11145	hypothetical protein	0	4.753	4	1	2	1	395	42.6	6.04	0.0528269	0	0	0	0	0	0	0	0	0	0	0	0	0	0	0	0	0	0	0	0	0
CBBNIB_11130	hypothetical protein	0	20.647	7	4	12	4	853	92.1	4.45	0.0489252	0	0	0	0.180364	0	0	0	0	0	0	0	0	0	0	0	0	0	0	0	0	0
CBBNIB_11125	hypothetical protein	0	37.449	30	5	25	5	289	29.6	4.21	0.180507	0	0	0	0.133089	0	0	0	0	0.0968677	0	0.771943	0	0	0.033529	0	0	0	0.0419038	0	0	0
CBBNIB_11120	Succinate--CoA ligase [ADP-forming] subunit beta	0	8.33	11	2	9	2	381	41	4.21	0.054768	0	0	0	0.100952	0	0.0323564	0	0	0.0183693	0	0.146386	0	0	0	0	0	0	0	0	0	0
CBBNIB_11115	hypothetical protein	0	11.475	14	5	7	5	469	50	4.61	0	0	0	0	0	0	0	0	0	0.104458	0	0	0	0	0	0	0	0	0	0	0	0
CBBNIB_11095	PG-binding-2 domain-containing protein	0.001	3.693	5	2	3	2	327	35.1	4.41	0	0	0	0	0	0	0	0	0	0	0	0.0568531	0	0	0.0592654	0	0	0	0	0	0	0
CBBNIB_11080	hypothetical protein	0	138.242	47	14	114	14	417	44.8	3.88	0.0250199	0	0	0	0	0	0.147815	0	0	1.74548	0	0.133748	0	0	0	0	0	0	0.0290412	0	0	0
CBBNIB_11065	hypothetical protein	0	4.131	3	1	8	1	312	34.1	4.88	0.0668802	0	0	0	0.0616389	0	0.0395122	0	0	0.0224317	0	0	0	0	0.0310573	0	0	0	0.0776295	0	0	0
CBBNIB_11060	Maltodextrin import ATP-binding protein MsmX	0	6.708	17	5	9	5	354	39	4.61	0.0884179	0	0	0	0.0543258	0	0	0	0	0	0	0.210067	0	0	0.0273726	0	0	0	0	0	0	0
CBBNIB_11045	hypothetical protein	0.011	2.585	7	1	1	1	264	27.8	4.21	0	0	0	0	0	0	0	0	0	0	0	0	0	0	0.0367041	0	0	0	0	0	0	0
CBBNIB_11030	hypothetical protein	0	32.118	25	6	11	6	427	45.6	4.31	0	0	0	0	0	0	0	0	0	0.180294	0	0	0	0	0	0	0	0	0	0	0	0
CBBNIB_11025	hypothetical protein	0	16.757	10	5	6	5	739	81	4.5	0.0282363	0	0	0.318865	0	0	0.0500452	0	0	0	0	0	0	0	0	0	0	0	0	0	0	0
CBBNIB_10995	MFS transporter	0	4.522	3	2	4	2	405	41.8	9.69	0.103045	0	0	0	0	0	0	0	0	0	0	0	0	0	0	0	0	0	0	0	0	0
CBBNIB_10980	hypothetical protein	0.013	2.363	11	2	2	2	314	33	4.45	0	0	0	0	0	0	0	0	0	0	0	0	0	0	0.0617191	0	0	0	0	0	0	0
CBBNIB_10960	hypothetical protein	0.011	2.697	6	1	4	1	286	32.1	4.35	0	0	0	0	0	0	0	0	0	0	0	0	0	0	0.0338807	0	0	0	0.12703	0	0	0
CBBNIB_10945	hypothetical protein	0	15.969	25	5	13	5	313	34.6	4.78	0.0333333	0	0	0	0.0614419	0	0	0	0	0.02236	0	0.059396	0	0	0.278623	0	0	0	0	0	0	0
CBBNIB_10920	hypothetical protein	0.017	2.25	3	1	2	1	332	35.9	4.56	0	0	0	0	0	0	0	0	0	0	0	0.0559969	0	0	0.0291864	0	0	0	0	0	0	0
CBBNIB_10890	hypothetical protein	0	4.773	8	2	10	2	262	28.4	5.43	0.119465	0	0	0	0	0	0.0941054	0	0	0.0267126	0	0.212874	0	0	0.0369843	0	0	0	0	0	0	0
CBBNIB_10885	hypothetical protein	0	10.665	19	3	9	3	269	28.8	4.56	0.155142	0	0	0	0.0714919	0	0.0458283	0	0	0.0260174	0	0	0	0	0	0	0	0	0.0900386	0	0	0
CBBNIB_10880	hypothetical protein	0.037	1.562	5	1	1	1	370	39.2	4.63	0	0	0	0	0	0	0	0	0	0	0	0	0	0	0.0261889	0	0	0	0	0	0	0
CBBNIB_10870	hypothetical protein	0	111.145	57	21	108	21	454	47.9	4.93	0.183847	0	0	0	0.254159	0	0.108615	0	0	0.354559	0	2.21126	0	0	0.234777	0	0	0	0.0533489	0	0	0
CBBNIB_10845	hypothetical protein	0	16.795	22	4	8	4	399	43.3	4.83	0	0	0	0	0	0	0	0	0	0	0	0.0465939	1.73893	0	0.0971418	0.187977	0	0	0.0303514	0	0	0
CBBNIB_10835	hypothetical protein	0	4.092	16	2	2	2	238	25.1	4.82	0.0438374	0	0	0	0	0	0	0	0	0.0294063	0	0	0	0	0	0	0	0	0	0	0	0
CBBNIB_10830	hypothetical protein	0	27.724	18	5	18	5	400	43.2	4.39	0.1565	0	0	0	0.0961566	0	0.061639	0	0	0.0699869	0	0.18591	0	0	0	0	0	0	0	0	0	0
CBBNIB_10825	hypothetical protein	0	28.966	33	8	20	8	335	36.8	4.67	0	0	0	0	0	0	0	0	0	0	0	0	0	0	0.578501	0	0	0	0	0	0	0
CBBNIB_10810	hypothetical protein	0.012	2.468	7	1	1	1	246	26	4.35	0	0	0	0	0	0	0	0	0	0	0	0	0	0	0	0	0	0	0.0492284	0	0	0
CBBNIB_10790	hypothetical protein	0	4.637	10	2	2	2	417	44.2	4.5	0	0	0	0	0	0	0	0	0	0.0335669	0	0	0	0	0	0	0	0	0	0	0	0
CBBNIB_10780	hypothetical protein	0	15.611	12	1	6	1	199	20.5	4.07	0	0	0	0	0	0	0	0	0	0	0	0	0	0	0	0	0	0	0.365132	0	0	0
CBBNIB_10735	hypothetical protein	0	287.042	43	18	381	18	758	80.1	3.97	0.633156	1.14348	0	0.932618	5.40405	30.6848	0.683071	1.02537	0.107891	0.369324	0	0.0490527	0	0	0.0383505	0	0	0	0.0159765	0	0	0
CBBNIB_10730	hypothetical protein	0	24.02	20	6	12	6	441	46.7	4.65	0	0	0	0	0	0	0	0	0	0.0952203	0	0.252938	0	0	0	0	0	0	0	0	0	0
CBBNIB_10725	hypothetical protein	0	22.901	12	4	11	4	449	47.4	4.77	0.0232368	0	0	0	0.0428315	0	0	0	0	0.0467619	0	0.165621	0	0	0	0	0	0	0.053943	0	0	0
CBBNIB_10695	hypothetical protein	0.001	3.338	9	1	1	1	232	24.2	4.32	0.0449712	0	0	0	0	0	0	0	0	0	0	0	0	0	0	0	0	0	0	0	0	0
CBBNIB_10685	Enolase	0	4.668	16	3	4	3	348	38.6	4.32	0	0	0	0	0	0	0	0	0	0.0201112	0	0.160267	0	0	0	0	0	0	0	0	0	0
CBBNIB_10680	hypothetical protein	0	10.84	21	3	7	3	235	25.8	6.3	0.177588	0	0	0	0.0818354	0	0.0524587	0	0	0.0297817	0	0	0	0	0	0	0	0	0	0	0	0
CBBNIB_10650	hypothetical protein	0	10.448	16	2	2	2	292	30.4	4.34	0	0	0	0	0	0	0	0	0	0	0	0	0	0	0.0331846	0	0	0	0.0414733	0	0	0
CBBNIB_10645	Glutamate dehydrogenase	0	16.504	20	6	13	6	417	44.6	4.48	0.0250199	0	0	0	0	0	0	0	0	0.0839172	0	0.222913	0	0.556857	0	0	0	0	0.0290412	0	0	0
CBBNIB_10625	hypothetical protein	0.017	2.271	7	1	1	1	211	22.4	4.39	0.049447	0	0	0	0	0	0	0	0	0	0	0	0	0	0	0	0	0	0	0	0	0
CBBNIB_10600	hypothetical protein	0	19.388	5	2	5	2	599	63.9	6.8	0.0696715	0	0	0	0.0321057	0	0	0	0	0	0	0	0	0	0	0	0	0	0	0	0	0
CBBNIB_10595	hypothetical protein	0.001	3.786	2	1	2	1	715	75.3	4.54	0.0291841	0	0	0	0	0	0	0	0	0	0	0	0	0	0	0	0	0	0	0	0	0
CBBNIB_10590	hypothetical protein	0	6.365	3	1	3	1	535	54.1	5.45	0.0195015	0	0	0	0.0359464	0	0.0230426	0	0	0	0	0	0	0	0	0	0	0	0	0	0	0
CBBNIB_10560	hypothetical protein	0	57.932	37	11	27	11	435	45.9	4.5	0.119923	0	0	0	0.0884199	0	0.0283398	0	0	0.0482668	0	0.213689	0	0	0.245032	0	0	0	0	0	0	0
CBBNIB_10545	hypothetical protein	0	8.566	5	1	9	1	385	40.7	5.27	0.054199	0	0	0	0.0499515	0	0	0	0	0	0	0	0	0	0.0503371	0	0	0	0.12582	0	0	0
CBBNIB_10520	hypothetical protein	0	4.153	5	1	1	1	566	63.1	4.36	0	0	0	0	0	0	0.0217806	0	0	0	0	0	0	0	0	0	0	0	0	0	0	0
CBBNIB_10515	hypothetical protein	0	19.825	24	2	14	2	146	15.6	4.5	0.500227	0	0	0	0.263443	0	0.253311	0	0	0	0	0	0	0	0.0663691	0	0	0	0.0829466	0	0	0
CBBNIB_10510	hypothetical protein	0	12.481	6	2	11	2	522	55.3	5.49	0.0599615	0	0	0	0.0368416	0	0.0236165	0	0	0.0268149	0	0	0	0	0.074252	0	0	0	0	0	0	0
CBBNIB_10500	hypothetical protein	0	41.003	25	8	44	8	445	47.7	4.37	0.281348	0	0	0	0.129649	0	0.110812	0	0	0.330275	0	0.0835549	0	0	0.0435501	0	0	0	0	0	0	0
CBBNIB_10495	hypothetical protein	0	19.033	19	5	11	5	308	33.1	5.21	0.0338744	0	0	0	0	0	0	0	0	0.0681691	0	0	0	0	0.0629214	0	0	0	0.196594	0	0	0
CBBNIB_10460	hypothetical protein	0	17.601	37	7	9	7	384	41	4.26	0	0	0	0	0	0	0	0	0	0.0729031	0	0.24207	0	0	0	0	0	0	0	0	0	0
CBBNIB_10395	hypothetical protein	0	10.886	3	2	7	2	825	86.8	4.07	0.0126464	0	0	0	0.0233107	0	0.0149428	0	0	0.0169665	0	0	0	0	0.0234906	0	0	0	0	0	0	0
CBBNIB_10385	hypothetical protein	0	70.387	24	14	60	14	737	77.4	5.78	0.169877	0	0	0	0.0260941	0	0.066908	0	0	0.0854657	0	0.0252252	0	0	0.144625	0	0	0	0.361498	0	0	0
CBBNIB_10380	hypothetical protein	0	51.235	37	15	31	14	586	66.1	4.6	0.142434	0	0	0	0	0	0	0	0	0.274693	0	0	0	0	0	0	0	0	0	0	0	0
CBBNIB_10370	hypothetical protein	0	10.97	18	3	13	3	283	29.6	4.53	0.0737336	0	0	0	0	0	0	0	0	0	0	0.0656925	0	0	0.0342399	0	0	0	0.38513	0	0	0
CBBNIB_10360	hypothetical protein	0	11.78	7	4	4	4	760	81.6	4.56	0.0274561	0	0	0	0	0	0.0162208	0	0	0	0	0	0	0	0.0127499	0	0	0	0	0	0	0
CBBNIB_10345	hypothetical protein	0.007	2.918	4	1	1	1	329	34.5	4.75	0	0	0	0	0	0	0	0	0	0	0	0	0	0	0	0	0	0	0.0368091	0	0	0
CBBNIB_10310	hypothetical protein	0	5.151	8	3	3	3	391	42.2	4.4	0	0	0	0	0	0	0	0	0	0	0	0	0	0	0.074347	0	0	0	0	0	0	0
CBBNIB_10265	hypothetical protein	0.012	2.482	4	1	3	1	276	30.4	4.93	0.0756037	0	0	0	0	0	0.044666	0	0	0	0	0	0	0	0	0	0	0	0	0	0	0
CBBNIB_10250	Proline--tRNA ligase	0	12.851	12	4	6	4	491	55.2	4.44	0.0212491	0	0	0	0	0	0.0502151	0	0	0.0427619	0	0	0	0	0	0	0	0	0	0	0	0
CBBNIB_10245	hypothetical protein	0	4.301	7	2	3	2	377	36	4.45	0	0	0	0	0	0	0	0	0	0.0185642	0	0.0493129	0	0	0.0257026	0	0	0	0	0	0	0
CBBNIB_10240	hypothetical protein	0	39.632	17	6	22	6	428	44	4.08	0.0243769	0	0	0	0	0	0	0	0	0.294338	0	0	0	0	0.0452799	0	0	0	0.0282949	0	0	0
CBBNIB_10220	hypothetical protein	0.029	1.75	5	1	1	1	277	30.8	4.21	0	0	0	0	0	0	0	0	0	0	0	0	0	0	0	0	0	0	0.0437191	0	0	0
CBBNIB_10215	hypothetical protein	0	6.011	2	2	2	2	1302	149.2	4.39	0.0160266	0	0	0	0	0	0	0	0	0	0	0	0	0	0	0	0	0	0	0	0	0
CBBNIB_10210	hypothetical protein	0	55.42	34	7	34	7	330	35.3	3.68	0	0	0	0	0.0582767	0	0.149428	0	0	0.593829	0	0	0	0	0.0293633	0	0	0	0	0	0	0
CBBNIB_10175	hypothetical protein	0	23.736	16	4	13	4	399	40.6	3.87	0	0	0	0	0	0	0.0617935	0	0	0.192946	0	0	0	0	0	0	0	0	0	0	0	0
CBBNIB_10170	hypothetical protein	0	16.487	13	3	8	3	415	42.6	4.36	0	0	0	0	0	0	0	0	0	0.134915	0	0	0	0	0	0	0	0	0	0	0	0
CBBNIB_10160	hypothetical protein	0	20.007	25	4	7	4	440	47.3	4.51	0	0	0	0	0	0	0	0	0	0.0159061	0	0.169009	0	1.0555	0	0	0	0	0	0	0	0
CBBNIB_10145	hypothetical protein	0	40.809	37	10	22	10	467	50.3	4.21	0.0223411	0	0	0	0	0	0.316774	0	0	0.104905	0	0.0398093	0	0	0	0	0	0	0.0259319	0	0	0
CBBNIB_10125	hypothetical protein	0	4.991	31	1	2	1	85	9.2	3.95	0	0	0	0	0	0	0	0	0	0.0823376	0	0	0	0	0.113999	0	0	0	0	0	0	0
CBBNIB_10110	hypothetical protein	0	4.738	12	3	6	3	534	57.7	4.54	0.0586141	0	0	0	0	0	0.0461716	0	0	0	0	0	0	0.434849	0	0	0	0	0	0	0	0
CBBNIB_10105	hypothetical protein	0	8.164	9	3	9	3	522	56.3	4.65	0.0999359	0	0	0	0	0	0	0	0	0	0	0.142459	0	0	0	0	0	0	0	0	0	0
CBBNIB_10095	hypothetical protein	0	15.95	27	6	28	6	234	24.3	4.96	0.535041	0	0	0	0.246555	0	0.105366	0	0	0.149545	0	0	0	0	0.124229	0	0	0	0.155259	0	0	0
CBBNIB_10090	hypothetical protein	0	4.835	24	2	3	2	220	22.6	8.73	0	0	0	0	0.0874151	0	0	0	0	0	0	0	0	0	0.0880899	0	0	0	0	0	0	0
CBBNIB_10080	hypothetical protein	0.006	2.944	8	2	2	2	535	58.7	4.59	0	0	0	0	0	0	0	0	0	0.0261633	0	0	0	0	0	0	0	0	0	0	0	0
CBBNIB_10070	hypothetical protein	0	40.174	26	9	46	9	501	54.1	4.5	0.020825	0	0	0	0.0767718	0	0.418309	0.387841	0.244853	0.0977861	0	0.185539	0	0	0.0580233	0	0	0	0.12086	0	0	0
CBBNIB_09950	hypothetical protein	0.001	3.741	4	2	4	2	916	92.8	3.79	0	0	0	1.029	0	0	0	0	0	0	0	0	0	0	0	0	0	0	0	0	0	0
CBBNIB_09855	hypothetical protein	0	6.28	7	2	2	2	707	76.8	4.55	0	0	0	0	0	0	0	0	0	0	0	0	0	0	0.0274113	0	0	0	0	0	0	0
CBBNIB_09845	hypothetical protein	0	6.203	4	3	3	3	1576	168.7	4.53	0.0132402	0	0	0	0	0	0	0.0410974	0	0	0	0	0	0	0	0	0	0	0	0	0	0
CBBNIB_09825	hypothetical protein	0	16.405	12	2	16	2	231	24.5	5.01	0.270995	0	0	0	0.166505	0	0.106734	0	0	0.0605947	0	0.0804804	0	0	0.0838952	0	0	0	0.0524251	0	0	0
CBBNIB_09815	hypothetical protein	0	15.227	18	4	14	4	448	49.1	4.56	0.0698659	0	0	0	0.0429271	0	0.0275174	0	0	0.0468662	0	0.248986	0	0	0	0	0	0	0	0	0	0
CBBNIB_09810	hypothetical protein	0.013	2.339	2	1	2	1	679	72.5	4.45	0	0	0	0	0	0	0.0363117	0	0	0	0	0	0	0	0	0	0	0	0	0	0	0
CBBNIB_09785	hypothetical protein	0	25.783	23	5	22	5	385	39.8	4.2	0.189697	0	0	0	0.149854	0	0.0320203	0	0	0.0545353	0	0.241441	0	0.603141	0.0503371	0	0	0	0	0	0	0
CBBNIB_09770	hypothetical protein	0.001	3.453	3	1	12	1	320	34.8	4.96	0.0652082	0	0	0	0.120196	0	0.0770488	0	0.127783	0.0218709	0	0.116194	0	0	0	0	0	0	0.0756887	0	0	0
CBBNIB_09745	hypothetical protein	0	57.93	30	11	42	11	631	68.3	4.59	0.198415	0	0	0	0.0914326	0	0.293054	0	0	0.0554572	0	0.0294627	0	0	0	0	0	0	0.115152	0	0	0
CBBNIB_09740	2-oxoglutarate ferredoxin oxidoreductase subunit beta	0	36.874	36	6	21	6	312	34.7	4.82	0.0334401	0	0	0	0	0	0	0	0	0	0	0	0	0	0.621147	0	0	0	0	0	0	0
CBBNIB_09725	hypothetical protein	0	6.732	6	4	5	4	1050	117.4	4.28	0.0298095	0	0	0.448841	0	0	0	0	0	0	0	0	0	0	0	0	0	0	0	0	0	0
CBBNIB_09720	hypothetical protein	0	6.605	8	2	3	2	368	39.6	4.5	0	0	0	0	0	0	0	0	0	0	0	0.0505189	0	0	0.0526625	0	0	0	0	0	0	0
CBBNIB_09715	hypothetical protein	0	6.962	14	1	9	1	170	18.2	6.52	0.0613724	0	0	0	0.226251	0	0.0725165	0	0.240532	0	0	0	0	0	0	0	0	0	0.284946	0	0	0
CBBNIB_09705	hypothetical protein	0.011	2.72	14	1	4	1	99	11.1	5.12	0.210774	0	0	0	0.194256	0	0	0	0	0.0706939	0	0	0	0	0	0	0	0	0	0	0	0
CBBNIB_09700	Arginase	0	8.12	22	2	3	2	301	31.1	4.45	0	0	0	0	0	0	0	0	0	0	0	0	0	0	0	0	0	0	0.1207	0	0	0
CBBNIB_09690	hypothetical protein	0	12.966	36	4	14	4	177	19.2	4.59	0.353671	0	0	0	0.108652	0	0.139297	0	0	0.0790813	0	0.105034	0	0	0.0547451	0	0	0	0.0684192	0	0	0
CBBNIB_09685	hypothetical protein	0	39.397	39	9	40	9	393	42	4.59	0.159287	0	0	0.599596	0.195739	0	0.0941054	0	0	0.178084	0	0.662274	0	1.18173	0	0	0	0	0	0	0	0
CBBNIB_09680	hypothetical protein	0.029	1.73	3	1	2	1	284	30	4.54	0	0	0	0	0	0	0	0	0	0.0246433	0	0	0	0	0.0341193	0	0	0	0	0	0	0
CBBNIB_09640	hypothetical protein	0.011	2.639	5	2	2	2	530	58.5	4.67	0	0	0	0	0	0	0	0	0	0.0264102	0	0	0	0	0	0	0	0	0	0	0	0
CBBNIB_09635	hypothetical protein	0.033	1.664	4	1	2	1	244	26	4.21	0	0	0	0	0	0	0	0	0	0	0	0	0	0	0.0794253	0	0	0	0	0	0	0
CBBNIB_09625	hypothetical protein	0.024	1.841	3	1	2	1	637	67.2	4.48	0	0	0	0	0	0	0.0193529	0	0.0641923	0	0	0	0	0	0	0	0	0	0	0	0	0
CBBNIB_09610	hypothetical protein	0	4.422	3	1	1	1	480	53.7	4.84	0.0217361	0	0	0	0	0	0	0	0	0	0	0	0	0	0	0	0	0	0	0	0	0
CBBNIB_09595	hypothetical protein	0	4.856	14	3	4	3	341	38.3	4.56	0	0	0	0	0	0	0	0	0	0	0	0	0	0	0.113664	0	0	0	0	0	0	0
CBBNIB_09585	hypothetical protein	0	19.646	15	5	12	5	585	63.9	4.48	0.0535041	0	0	0	0	0	0.126439	0	0	0.0358907	0	0	0	0	0	0	0	0	0	0	0	0
CBBNIB_09580	hypothetical protein	0	10.55	27	3	5	3	287	31.3	4.78	0	0	0	0	0	0	0	0	0	0	0	0	0	0	0	0	0	0	0.210979	0	0	0
CBBNIB_09575	hypothetical protein	0	24.451	30	9	21	9	411	46.2	4.91	0.126926	0	0	0	0.0467915	0	0	0	0	0.136228	0	0.316634	0	0	0	0	0	0	0	0	0	0
CBBNIB_09570	hypothetical protein	0	42.901	31	8	29	8	382	41.6	4.55	0.0546247	0	0	0	0.100688	0	0.0645435	0	0	0.0549636	0	0.0973349	0	0	0.431226	0.196342	0	0	0	0	0	0
CBBNIB_09565	hypothetical protein	0	7.56	7	2	3	2	629	68.1	4.58	0.0165871	0	0	0	0	0	0.0391981	0	0	0	0	0	0	0	0	0	0	0	0	0	0	0
CBBNIB_09550	hypothetical protein	0.006	2.96	2	1	4	1	926	102	4.48	0.0112671	0	0	0	0.0623045	0	0	0	0	0	0	0	0	0	0	0	0	0	0	0	0	0
CBBNIB_09525	hypothetical protein	0	14.532	10	3	35	3	501	51.7	5.06	0.29155	0.346012	0	0	0.191929	0	0.123032	0	0	0.0279389	0	0.0742154	0	0.463491	0.0386822	0	0	0	0.0725161	0	0	0
CBBNIB_09520	hypothetical protein	0	5.925	4	2	10	2	510	54.2	4.72	0.16366	0	0	0	0.0377085	0	0	0	0	0.0137229	0	0	0	0	0	0	0	0	0	0	0	0
CBBNIB_09515	hypothetical protein	0	12.889	11	4	5	4	680	72.2	5.68	0.0767155	0	0	0	0	0	0	0	0	0	0	0	0	0	0	0	0	0	0	0	0	0
CBBNIB_09495	hypothetical protein	0.022	2.169	8	1	1	1	153	17.7	4.83	0.0681916	0	0	0	0	0	0	0	0	0	0	0	0	0	0	0	0	0	0	0	0	0
CBBNIB_09490	hypothetical protein	0.001	3.561	2	1	29	1	357	37.7	4.96	0.350699	0	0	0	0.269346	0	0.20719	0	0	0.0196042	0	0.156227	0	0	0.0271426	0	0	0	0.0339221	0	0	0
CBBNIB_09485	hypothetical protein	0	178.246	65	26	188	26	554	63.2	4.59	0.659144	0	0	0	0.624845	0	0.400542	0	0	1.1496	0	0.100673	0	0	0.367306	0	0	0	0.0437191	0	0	0
CBBNIB_09480	hypothetical protein	0	9.932	21	3	5	3	232	26	5.06	0.179885	0	0	0	0	0	0	0	0	0	0	0	0	0	0.0417668	0	0	0	0	0	0	0
CBBNIB_09470	hypothetical protein	0	10.525	17	3	5	3	218	22.9	4.36	0	0	0	0	0.0882171	0	0	0	0	0.128416	0	0	0	0	0	0	0	0	0	0	0	0
CBBNIB_09465	hypothetical protein	0	47.962	47	11	31	11	407	42.5	4.7	0	0	0	0	0	0	0	0	0	0.137566	0	0.776527	0	0	0.11904	0	0	0	0.0297548	0	0	0
CBBNIB_09455	N5-carboxyaminoimidazole ribonucleotide synthase	0	14.368	18	5	11	5	392	41.2	4.3	0	0	0	0	0	0	0	0	0	0.196392	0	0	0	0	0	0	0	0	0	0	0	0
CBBNIB_09435	hypothetical protein	0	21.493	31	5	13	5	389	40	4.61	0.160925	0	0	0	0.0494379	0	0.031691	0	0	0.0179915	0	0.191167	0	0	0	0	0	0	0	0	0	0
CBBNIB_09430	hypothetical protein	0	14.064	6	2	23	2	378	41	4.64	0.110405	0	0	0	0.15263	0	0.0652265	0	0	0.129605	0	0.0491824	0	0	0.102539	0	0	0	0.0640751	0	0	0
CBBNIB_09405	hypothetical protein	0	16.776	33	4	6	4	279	29.9	4.36	0	0	0	0	0	0	0	0	0	0	0	0	0	0	0	0	0	0	0.260434	0	0	0
CBBNIB_09395	4-hydroxy-tetrahydrodipicolinate synthase	0.001	3.358	17	3	3	3	332	35.3	4.7	0.0314256	0	0	0	0	0	0	0	0	0	0	0	0	0	0.0583728	0	0	0	0	0	0	0
CBBNIB_09390	hypothetical protein	0.005	3.058	10	1	1	1	227	24.8	4.46	0.0459617	0	0	0	0	0	0	0	0	0	0	0	0	0	0	0	0	0	0	0	0	0
CBBNIB_09385	hypothetical protein	0	7.117	9	2	4	2	308	33.5	4.63	0	0	0	0	0	0	0	0	0	0	0	0	0	0	0	0	0	0	0.157275	0	0	0
CBBNIB_09340	hypothetical protein	0	18.372	20	5	21	5	343	38.1	4.63	0.212925	0	0	0	0.056068	0	0.0359411	0	0	0.0408087	0	0.162603	0	0	0.169502	0	0	0	0.0353067	0	0	0
CBBNIB_09325	hypothetical protein	0	9.031	9	3	15	3	343	37.4	5.43	0.152089	0	0	0	0	0	0.0359411	0	0	0.0408087	0	0.0542011	0	0	0.0282504	0	0	0	0.176533	0	0	0
CBBNIB_09305	ABC transporter domain-containing protein	0.007	2.844	2	1	30	1	380	40.2	4.97	0.0274561	5.47428	0	0	0.151826	0	0.324416	0	0.215213	0	0	0.0489236	0	0	0.0254997	0	0	0	0	0	0	0
CBBNIB_09300	hypothetical protein	0	16.764	23	7	18	7	452	48.6	4.84	0.161578	0	0	0	0.127642	0	0	0	0	0.0619353	1.58095	0.0822609	0	0	0.0214378	0	0	0	0	0	0	0
CBBNIB_09295	hypothetical protein	0	4.098	8	1	1	1	179	20.4	4.98	0.0582866	0	0	0	0	0	0	0	0	0	0	0	0	0	0	0	0	0	0	0	0	0
CBBNIB_09290	Glutathione import ATP-binding protein GsiA	0	66.561	37	13	59	13	442	48.8	4.49	0.377676	0	0	0	0.174039	0	0.167346	0	0	0.443356	1.61672	0.084122	0	0	0.0219228	0	0	0	0.0273986	0	0	0
CBBNIB_09285	ABC transporter domain-containing protein	0	71.567	41	13	86	13	358	39.1	4.41	0.582866	0	0	0	0.268594	0	0.241046	0	0	0.195494	0	0.519301	0	0	0.866136	0	0	0	0.0676547	0	0	0
CBBNIB_09280	hypothetical protein	0.023	1.888	3	1	1	1	350	37.9	6.13	0.0298095	0	0	0	0	0	0	0	0	0	0	0	0	0	0	0	0	0	0	0	0	0
CBBNIB_09275	hypothetical protein	0	10.334	15	4	13	4	301	32.8	5.14	0.173311	0	0	0	0.0638915	0	0.0409562	0	0	0.0697544	0	0	0	0	0.096577	0	0	0	0	0	0	0
CBBNIB_09270	hypothetical protein	0	195.511	36	15	282	15	660	72.6	3.99	0.363585	0	0	0.357032	6.00251	2.93675	0.298856	0.294407	1.17715	0.0954367	0	0.0281681	0	0	0.044045	0	0	0	0	0	0	0
CBBNIB_09265	hypothetical protein	0	491.374	52	23	1667	23	637	71	3.97	0.507743	2.17711	0	3.32931	5.76638	6.08558	11.6311	8.33767	39.6067	0.791061	0	0.233481	0	5.83257	0.0152118	0	0	0	0.0380226	1.98258	0	50.2732
CBBNIB_09255	hypothetical protein	0	8.382	6	2	11	2	394	43.5	4.88	0.158883	0	0	0	0.0488105	0	0.0312888	0	0	0.0355264	0	0	0	0	0.0245936	0	0	0	0	0	0	0
CBBNIB_09245	hypothetical protein	0	7.562	7	3	12	3	444	48.7	4.77	0.117492	0	0	0	0.0433138	0	0	0	0	0.0472885	0	0.0418715	0	0	0.0436482	0	0	0	0	0	0	0
CBBNIB_09225	hypothetical protein	0	16.557	10	6	12	6	638	68.1	4.06	0.0654126	0	0	0	0.0301431	0	0.135258	0	0	0	0	0	0	0	0	0	0	0	0	0	0	0
CBBNIB_09220	hypothetical protein	0.042	1.506	6	1	1	1	214	21	4.27	0	0	0	0	0	0	0	0	0	0.0327042	0	0	0	0	0	0	0	0	0	0	0	0
CBBNIB_09215	hypothetical protein	0.011	2.582	7	1	1	1	259	28.2	4.22	0	0	0	0	0	0	0	0	0	0	0	0	0	0	0.0374127	0	0	0	0	0	0	0
CBBNIB_09210	hypothetical protein	0	15.402	33	2	8	2	136	14.1	8.54	0.0767155	0	0	0	0.42422	0	0.181291	0	0	0	0	0	0	0	0	0	0	0	0.178091	0	0	0
CBBNIB_09200	hypothetical protein	0	7.744	8	2	5	2	462	46.8	4.22	0.0225829	0	0	0	0	0	0	0	0	0.0605947	0	0	0	0	0	0	0	0	0	0	0	0
CBBNIB_09195	hypothetical protein	0.002	3.15	7	2	2	2	380	40.3	4.35	0	0	0	0	0	0	0	0	0	0.0184176	0	0	0	0	0.0254997	0	0	0	0	0	0	0
CBBNIB_09140	hypothetical protein	0.021	2.109	5	1	2	1	143	15.2	4.51	0.0729602	0	0	0	0	0	0	0	0	0.0489419	0	0	0	0	0	0	0	0	0	0	0	0
CBBNIB_09135	Cytochrome b6-f complex subunit 4	0	19.33	10	2	27	2	272	30	4.83	0.34522	0	0	0	0.282814	0	0.271937	0	0	0.0257305	0	0.205047	0	0	0.106874	0	0	0	0.0445228	0	0	0
CBBNIB_09130	hypothetical protein	0	33.603	20	4	25	4	269	30.5	6.64	0.387855	0	0	0	0.35746	0	0.0916565	0	0.152009	0.0520349	0	0.138223	0	0	0	0	0	0	0.135058	0	0	0
CBBNIB_09115	hypothetical protein	0	9.928	9	2	30	2	294	31.9	4.26	0.248412	0	0	0	0.196238	0	0.125794	0	0	0.0714152	0	0.126469	0	0.789827	0.197753	0.255111	0	0	0.164765	0	0	0
CBBNIB_09080	hypothetical protein	0	4.099	11	1	1	1	138	15.1	4.5	0	0	0	0	0	0	0	0	0	0.0507152	0	0	0	0	0	0	0	0	0	0	0	0
CBBNIB_09060	hypothetical protein	0.001	3.401	3	1	4	1	331	35.9	9.39	0.0315206	0	0	0.711908	0	0	0.0372441	0	0	0	0	0	0	0	0	0.226594	0	0	0	0	0	0
CBBNIB_09055	hypothetical protein	0	70.586	27	6	23	6	419	44.8	3.8	0	0	0	0	0	0	0.0588439	0	0	0.35077	0	0	0	0	0	0	0	0	0	0	0	0
CBBNIB_09050	Oligosaccharides import ATP-binding protein MsmX	0	6.208	12	2	11	2	377	41.4	4.34	0.221396	0	0	0	0	0	0	0	0	0.0556925	0	0	0	0	0	0	0	0	0	0	0	0
CBBNIB_09040	hypothetical protein	0.001	3.763	13	2	2	2	522	55.4	4.13	0	0	0	0	0	0	0.0236165	0	0	0.0134075	0	0	0	0	0	0	0	0	0	0	0	0
CBBNIB_09035	hypothetical protein	0	7.982	10	3	10	3	247	26.1	7.43	0.295681	0	0	0	0	0	0.0499101	0	0	0.0283348	0	0	0	0	0.0392303	0	0	0	0	0	0	0
CBBNIB_09030	hypothetical protein	0	6.412	17	3	4	3	386	40.5	4.5	0	0	0	0	0	0	0	0	0	0	0	0.192652	0	0	0	0	0	0	0	0	0	0
CBBNIB_09020	hypothetical protein	0	40.562	16	10	38	10	678	74.9	4.88	0.27699	0	0	0	0.198554	0	0.090913	0	0.0603105	0.0516128	0	0.0274203	0	0	0	0	0	0	0.0178616	0	0	0
CBBNIB_09010	hypothetical protein	0.008	2.806	5	2	8	2	587	60.1	3.79	0.0355479	0	0	0	0	0	0.0420027	0	0	0.0238456	0	0	0	0	0.033015	0	0	0	0	0	0	0
CBBNIB_09005	hypothetical protein	0	6.896	9	2	3	2	424	45	4.26	0.0246069	0	0	0	0	0	0	0	0	0.0330127	0	0	0	0	0	0	0	0	0	0	0	0
CBBNIB_08995	hypothetical protein	0	7.539	10	2	4	2	342	37.3	4.42	0	0	0	0	0	0	0	0	0	0.020464	0	0.163079	0	0	0	0	0	0	0	0	0	0
CBBNIB_08980	hypothetical protein	0.001	3.728	24	2	2	2	213	24	5.01	0	0	0	0	0	0	0	0	0	0.0328577	0	0	0	0	0	0	0	0	0.0568554	0	0	0
CBBNIB_08960	hypothetical protein	0	13.947	7	3	16	3	522	53.5	4.6	0.0799487	0	0	0	0	0	0.047233	0	0	0.0134075	0	0.0356149	0	0	0.111378	0	0	0	0.0463992	0	0	0
CBBNIB_08955	hypothetical protein	0.001	3.717	35	2	2	2	94	10	4.41	0.110993	0	0	2.50682	0	0	0	0	0	0	0	0	0	0	0	0	0	0	0	0	0	0
CBBNIB_08925	hypothetical protein	0	13.211	7	1	3	1	246	24.6	6.16	0.0848236	0	0	0	0	0	0.050113	0	0	0	0	0	0	0	0	0	0	0	0	0	0	0
CBBNIB_08920	putative beta-carotene 15,15'-dioxygenase	0.024	1.845	8	1	8	1	350	36.6	9.7	0.0596189	0.990583	0	0	0	0	0	0	0	0.0399925	0	0	0	0	0	0	0	0	0.0692011	0	0	0
CBBNIB_08910	hypothetical protein	0	11.846	12	2	35	2	259	27.9	4.48	0.483397	0.669313	6.18535	0	0.66827	0	0.0951954	0	0.315757	0.054044	0	0.287119	0	0	0.0374127	0	0	0	0.0467575	0	0	0
CBBNIB_08900	hypothetical protein	0	11.219	9	5	10	5	691	72.9	4.69	0.0301977	0	0	0	0	0	0.124884	0	0	0.0101284	0	0	0	0	0	0	0	0	0	0	0	0
CBBNIB_08885	hypothetical protein	0	293.131	81	33	538	24	382	42.4	4.49	1.5568	1.8152	0	0.616862	1.40963	0	0.613163	0	0.107043	0.824453	0	4.42874	0	1.82363	3.88103	0	0	0	4.31148	0	0	0
CBBNIB_08835	hypothetical protein	0	5.059	4	1	3	1	330	33.9	8.28	0.0316161	0	0	0	0	0	0	0	0	0.0212082	0	0	0	0	0.0293633	0	0	0	0	0	0	0
CBBNIB_08810	hypothetical protein	0.021	2.001	1	1	2	1	1675	172	3.71	0	0	0	0	0	0	0	0	0	0	0	0.0110991	0	0.138632	0	0	0	0	0	0	0	0
CBBNIB_08780	hypothetical protein	0	57.831	36	19	52	19	791	84.6	4.46	0.19785	0	0	0	0.437628	0	0.0311702	0	0.103389	0.106175	0	0.0235031	0	0	0.0245004	0	0	0	0	0	0	0
CBBNIB_08765	hypothetical protein	0	27.794	41	9	18	9	349	38.2	5.3	0.0597897	0	0	0	0	0	0.0353232	0	0	0.0802142	0	0.0532692	0	0	0.249883	0	0	0	0.0346997	0	0	0
CBBNIB_08760	Acyl-peptide hydrolase	0	14.723	16	5	13	5	601	66.5	4.51	0.0173599	0	0	0	0.0639978	0	0.0615365	0.107769	0	0.0698705	0	0	0	0	0	0	0	0	0	0	0	0
CBBNIB_08750	hypothetical protein	0	7.924	20	2	4	2	276	30.1	4.32	0	0	0	0	0	0	0	0	0	0	0	0	0	0	0.0351083	0	0	0	0.131633	0	0	0
CBBNIB_08720	hypothetical protein	0	5.397	10	3	4	3	510	55.3	4.67	0	0	0	0	0	0	0	0	0	0.0548917	0	0	0	0	0	0	0	0	0	0	0	0
CBBNIB_08715	hypothetical protein	0	12.488	8	2	28	2	271	28.9	4.55	0.461992	0	0	0	0.283857	0	0.18196	0	0	0.103302	0	0.0686013	0	0	0.107268	0	0	0	0	0	0	0
CBBNIB_08705	hypothetical protein	0	11.436	8	3	7	3	512	54.6	4.72	0	0	0	0	0	0	0.096311	0	0.0798643	0.0273386	0	0	0	0	0	0	0	0	0	0	0	0
CBBNIB_08655	hypothetical protein	0	18.934	19	8	9	8	585	61.4	4.5	0	0	0	0	0	0	0.189659	0	0	0	0	0	0	0	0	0	0	0	0	0	0	0
CBBNIB_08625	hypothetical protein	0	18.033	11	5	12	5	712	79.3	4.26	0.0586141	0	0	0	0.189072	0	0.0173143	0	0	0	0	0	0	0	0	0	0	0	0	0	0	0
CBBNIB_08600	hypothetical protein	0	5.536	10	2	11	2	311	32.6	4.25	0.0335476	0	0	0	0	0	0.118918	0	0.131481	0	0	0.239112	0	0	0.0623144	0	0	0	0	0	0	0
CBBNIB_08595	hypothetical protein	0	41.31	27	9	34	9	387	41	4.7	0.188716	0	0	0	0	0	0	0	0	0.0542534	0	0	0	0	0.525808	0	0	0	0.0938775	0	0	0
CBBNIB_08585	hypothetical protein	0	4.385	9	1	9	1	152	15.7	8.63	0.13728	0	0	0	0.126522	0	0.081104	0	0	0.138132	0	0	0	0	0.127499	0	0	0	0	0	0	0
CBBNIB_08580	hypothetical protein	0.001	3.226	23	2	3	2	164	16.3	3.92	0	0	0	0	0	0	0	0	0	0.042675	0	0	0	0	0	0	0	0	0.147685	0	0	0
CBBNIB_08565	hypothetical protein	0	18.325	24	5	7	5	316	33.8	4.61	0	0	0	0	0	0	0	0	0	0	0	0	0	0	0.214649	0	0	0	0	0	0	0
CBBNIB_08540	hypothetical protein	0	19.354	22	3	5	3	301	30.7	4.51	0	0	0	0	0	0	0	0	0	0	0	0	0	0	0.160962	0	0	0	0	0	0	0
CBBNIB_08535	hypothetical protein	0	6.172	18	2	6	2	137	14.7	4.26	0.152311	0	0	0	0.140375	0	0	0	0	0.0510854	0	0.1357	0	0	0.0707291	0	0	0	0	0	0	0
CBBNIB_08530	hypothetical protein	0	5.541	14	3	4	3	239	26.7	4.83	0.043654	0	0	0	0	0	0	0	0	0.0292832	0	0	0	0	0.081087	0	0	0	0	0	0	0
CBBNIB_08515	hypothetical protein	0	4.384	8	2	2	2	343	36	5.03	0	0	0	0	0	0	0	0	0	0	0	0	0	0	0.0565008	0	0	0	0	0	0	0
CBBNIB_08490	hypothetical protein	0	6.918	8	2	3	2	353	38.4	4.55	0	0	0	0	0	0	0	0	0	0	0	0	0	0	0.0823503	0	0	0	0	0	0	0
CBBNIB_08440	hypothetical protein	0.007	2.909	6	1	2	1	304	34.8	4.86	0.0343201	0	0	0	0.0632609	0	0	0	0	0	0	0	0	0	0	0	0	0	0	0	0	0
CBBNIB_08420	hypothetical protein	0	21.088	30	7	16	7	318	34.3	4.75	0	0	0	0	0.0604759	0	0	0	0	0.0220085	0	0	0	0	0.426599	0	0	0	0	0	0	0
CBBNIB_08410	hypothetical protein	0.021	1.965	3	1	1	1	278	30	4.68	0	0	0	0	0	0	0	0	0	0	0	0	0	0	0.0348557	0	0	0	0	0	0	0
CBBNIB_08380	hypothetical protein	0	28.526	19	5	11	5	601	63.7	4.4	0.0520797	0	0	0	0	0	0.143585	0	0	0.0116451	0	0	0	0	0	0	0	0	0	0	0	0
CBBNIB_08365	hypothetical protein	0	5.455	9	1	10	1	215	22.4	4.41	0.097054	0	0	0	0.089448	0	0	0	0	0.0976562	0	0	0	0	0.0901385	0	0	0	0.112653	0	0	0
CBBNIB_08360	hypothetical protein	0	9.994	6	2	10	2	505	52.4	4.94	0.12396	0	0	0	0.0380818	0	0.0244115	0	0	0.0277176	0	0	0	0	0	0	0	0	0	0	0	0
CBBNIB_08335	hypothetical protein	0	5.356	11	2	5	2	161	18	9.95	0.129606	0	0	0	0.119449	0	0.0765702	0	0	0.0434701	0	0	0	0	0	0	0	0	0	0	0	0
CBBNIB_08330	hypothetical protein	0	51.884	44	13	53	13	350	38	4.37	0.327904	0	0	0	0.16484	0	0.0704446	0	0.23366	0.239955	0	0.796756	0	0	0.193798	0	0	0	0.0346006	0	0	0
CBBNIB_08320	hypothetical protein	0	14.108	19	3	9	3	216	22.5	4.32	0	0	0	0	0	0	0	0	0	0	0	0	0	0	0.0897212	0	0	0	0.39246	0	0	0
CBBNIB_08295	hypothetical protein	0	137.387	61	18	136	18	436	45.6	4.26	0.263226	0	0	0	0.30876	0	0.452397	0.148554	0	1.39653	0	0.383758	0	0	0.111123	0	0	0	0	0	0	0
CBBNIB_08290	hypothetical protein	0	5.837	7	2	7	2	387	40.7	4.91	0.0539189	0	0	0	0	0	0	0	0	0.0180845	0	0.144116	0	0	0.0250385	0	0	0	0	0	0	0
CBBNIB_08285	hypothetical protein	0.049	1.434	4	1	1	1	314	32.2	7.37	0.0332271	0	0	0	0	0	0	0	0	0	0	0	0	0	0	0	0	0	0	0	0	0
CBBNIB_08265	hypothetical protein	0.012	2.452	22	1	4	1	49	5.2	5.08	0.425849	0	0	0	0	0	0.503176	0	0	0	0	0	0	0	0	0	0	0	0	0	0	0
CBBNIB_08225	hypothetical protein	0	9.196	20	4	4	4	480	50.2	5.36	0.0434721	0	0	0	0	0	0	0	0	0.0145806	0	0.0387312	0	0	0	0	0	0	0	0	0	0
CBBNIB_08215	hypothetical protein	0.021	1.946	7	1	1	1	231	26.2	4.32	0	0	0	0	0	0	0	0	0	0.0302974	0	0	0	0	0	0	0	0	0	0	0	0
CBBNIB_08205	malate dehydrogenase (quinone)	0.008	2.796	3	2	2	2	491	53.3	4.3	0	0	0	0	0	0	0	0	0	0.0285079	0	0	0	0	0	0	0	0	0	0	0	0
CBBNIB_08190	S-methyl-5'-thioadenosine phosphorylase	0	4.739	23	3	4	3	288	31.2	4.45	0	0	0	0	0	0	0	0	0	0	0	0	0	0	0.0672909	0	0	0	0.0840986	0	0	0
CBBNIB_08135	hypothetical protein	0	49.093	58	9	61	9	317	33.9	4.59	0.263301	0	0	0.743348	0.242667	0	0.272223	0	0.128992	0.0883116	0	0.293233	0	0	0.275107	0	0	0	0.840455	0	0	0
CBBNIB_08100	Phosphate import ATP-binding protein PstB 2	0	24.243	60	10	20	10	278	30.3	4.4	0.0750598	0	0	0	0.0691774	0	0	0	0	0.0251752	0	0	0	0	0.313702	0	0	0	0.304933	0	0	0
CBBNIB_08095	hypothetical protein	0	32.934	11	3	9	3	588	60	6.84	0.0532312	0	0	0	0.0327063	0	0	0	0	0	0	0.0948519	0	0	0	0	0	0	0.0411911	0	0	0
CBBNIB_08085	Phosphate-binding protein	0	45.902	31	3	39	3	334	35.5	3.84	0	0	0	0.705513	0	0	0.0369096	0	0.122427	0.0838167	8.55797	0.222646	4.15468	14.6	0.0290116	0	0	0	0	0	0	0
CBBNIB_08070	hypothetical protein	0	16.024	8	4	14	4	730	80.2	4.49	0.100045	0	0	0	0.0526886	0	0.0337748	0	0	0.0191745	0	0.0254671	0	0	0	0	0	0	0	0	0	0
CBBNIB_08045	hypothetical protein	0.021	1.963	6	1	3	1	241	25	5.5	0.0865835	0	0	0	0	0	0	0	0	0	0	0	0	0	0.040207	0	0	0	0	0	0	0
CBBNIB_08035	hypothetical protein	0	21.533	16	5	14	5	458	49.9	4.28	0.0683404	0	0	0	0	0	0	0	0	0.168091	0	0	0	0	0	0	0	0	0	0	0	0
CBBNIB_07985	hypothetical protein	0	12.934	21	4	5	4	324	34.3	4.21	0	0	0	0	0	0	0	0	0	0	0	0.286898	0	0	0	0	0	0	0	0	0	0
CBBNIB_07980	hypothetical protein	0	8.412	12	3	4	3	277	29.9	4.12	0	0	0	0	0	0	0	0	0	0	0	0	0	0	0.139926	0	0	0	0	0	0	0
CBBNIB_07965	hypothetical protein	0	58.912	57	14	50	14	447	46.6	4.44	0	0	0	0	0	0	0	0	0	0.219198	0	1.37249	0	1.03897	0.0216776	0	0	0	0	0	0	0
CBBNIB_07960	hypothetical protein	0	29.915	20	8	62	8	440	45.7	4.26	0.189697	0	0	0	0.131123	0	0.140089	0	0.092933	0.302216	0	0.253513	0	0.527748	0.198202	0	0	0	0.275232	0	0	0
CBBNIB_07945	hypothetical protein	0	5.077	7	1	2	1	328	36	4.45	0	0	0	0	0	0	0	0	0	0	0	0	0	0	0	0	0	0	0.0738427	0	0	0
CBBNIB_07925	hypothetical protein	0.001	3.748	7	2	5	2	385	40.3	4.34	0.054199	0	0	0	0	0	0	0	0	0.0181784	0	0.0965764	0	0	0	0	0	0	0	0	0	0
CBBNIB_07870	hypothetical protein	0	7.836	6	2	4	2	469	51.2	4.51	0.0222459	0	0	0	0	0	0	0	0	0.0447678	0	0	0	0	0	0	0	0	0	0	0	0
CBBNIB_07820	hypothetical protein	0	4.441	19	2	3	2	172	18.5	4.31	0	0	0	0	0	0	0	0	0	0.0406901	0	0	0	0	0.112673	0	0	0	0	0	0	0
CBBNIB_07805	hypothetical protein	0	14.921	17	5	6	5	501	55.5	4.44	0	0	0	0	0	0	0	0	0	0.0838167	0	0	0	0	0	0	0	0	0	0	0	0
CBBNIB_07795	hypothetical protein	0	4.333	15	2	4	2	268	28.7	4.63	0.0389303	0	0	0	0	0	0	0	0	0.0261145	0	0	0	0	0.0361563	0	0	0	0.0451873	0	0	0
CBBNIB_07790	hypothetical protein	0.019	2.236	4	1	2	1	390	43.7	4.56	0.0267521	0	0	0	0	0	0	0	0	0	0	0.0476691	0	0	0	0	0	0	0	0	0	0
CBBNIB_07785	hypothetical protein	0.007	2.912	7	1	1	1	289	31.8	4.39	0	0	0	0	0	0	0	0	0	0	0	0	0	0	0.033529	0	0	0	0	0	0	0
CBBNIB_07760	hypothetical protein	0	35.581	34	11	24	11	548	57.8	4.23	0.0761555	0	0	0	0.105281	0	0.33744	0	0	0.0255427	0	0	0	0	0	0	0	0	0	0	0	0
CBBNIB_07750	hypothetical protein	0.021	2.148	7	1	6	1	122	13.2	4.97	0.171038	0	0	0	0.157634	0	0.101048	0	0	0	0	0	0	0	0	0	0	0	0.198528	0	0	0
CBBNIB_07745	hypothetical protein	0	49.121	31	10	18	10	507	53.9	4.61	0.164628	0	0	0	0	0	0	0	0	0.138041	0	0	0	0	0	0	0	0	0	0	0	0
CBBNIB_07730	hypothetical protein	0.024	1.808	4	1	5	1	167	17.8	4.17	0	0	0	0	0	0	0	0	0	0.0419083	0	0	0	0	0.116047	0	0	0	0.0725161	3.78116	0	0
CBBNIB_07715	hypothetical protein	0.001	3.33	17	1	1	1	126	13.1	3.89	0	0	0	0	0	0	0	0	0	0	0	0	0	0	0	0	0	0	0.0961127	0	0	0
CBBNIB_07705	Thiazole biosynthesis adenylyltransferase ThiF, E coli subfamily	0.021	2.139	4	1	3	1	270	28.6	4.54	0.0772838	0	0	0	0	0	0	0	0	0	0	0	0	0	0	0	0	0	0.0448526	0	0	0
CBBNIB_07695	hypothetical protein	0	5.631	11	2	7	2	196	22.8	10.77	0	0	0	0	0	0	0	0	0	0.107123	0	0	0	0	0.0988764	0	0	0	0.123573	0	0	0
CBBNIB_07625	hypothetical protein	0.01	2.768	4	1	1	1	575	61.6	4.12	0.0181449	0	0	0	0	0	0	0	0	0	0	0	0	0	0	0	0	0	0	0	0	0
CBBNIB_07615	hypothetical protein	0	9.577	24	2	3	2	222	22.5	4.48	0.0469969	0	0	0	0	0	0	0	0	0	0	0	0	0	0	0	0	0	0.109101	0	0	0
CBBNIB_07605	ABC transporter domain-containing protein	0	75.706	51	13	115	13	350	38.5	4.64	0.596189	0	0	0	0.439573	0	0.140889	0	0	0.259951	0	0.371819	0	0	1.55038	0.428587	0	0	0.173003	0	0	0
CBBNIB_07600	hypothetical protein	0	67.66	47	11	57	11	437	46.8	4.4	0.238748	0	0	0	0	0	0.0282101	0	0	0.256245	0	0.850845	0	2.65686	0.066521	0	0	0	0.0554242	0	0	0
CBBNIB_07595	hypothetical protein	0	25.374	19	4	50	4	339	36	5.05	0.246214	0	0	0	0.113459	0	0.109096	0	0	0.103226	0	0.109681	0	0	0.400172	0	0	0	0.571573	0	0	0
CBBNIB_07590	hypothetical protein	0	8.431	19	3	9	3	330	35.3	5.12	0.0948483	0	0	0	0.233107	0	0.037357	0	0	0.0212082	0	0	0	0	0	0	0	0	0	0	0	0
CBBNIB_07585	hypothetical protein	0	228.403	42	17	1053	17	544	59.1	4.06	0.728797	4.1426	0	1.73266	3.35841	0	8.95126	12.3824	11.1998	1.96838	2.62717	0.991062	0	1.28057	0.427495	0	0	0	0.400705	0	0	0
CBBNIB_07565	hypothetical protein	0	4.158	10	3	3	3	483	47.9	4.46	0	0	0	0	0	0	0	0	0	0.0434701	0	0	0	0	0	0	0	0	0	0	0	0
CBBNIB_07560	hypothetical protein	0	18.055	16	3	7	3	360	38.3	4.25	0.0579628	0	0	0	0	0	0	0	0	0.0194408	0	0.0516416	0	0.645026	0.0538327	0	0	0	0	0	0	0
CBBNIB_07550	hypothetical protein	0	5.484	2	1	2	1	836	87.5	4.22	0.01248	0	0	0	0.023004	0	0	0	0	0	0	0	0	0	0	0	0	0	0	0	0	0
CBBNIB_07525	hypothetical protein	0.001	3.536	4	2	2	2	527	54.9	5.1	0.0395951	0	0	0	0	0	0	0	0	0	0	0	0	0	0	0	0	0	0	0	0	0
CBBNIB_07500	Magnesium chelatase	0	26.119	29	7	18	7	320	34.5	4.61	0.130416	0	0	0	0	0	0	0	0	0.0437418	0	0	0	0	0.302809	0	0	0	0.0756887	0	0	0
CBBNIB_07485	hypothetical protein	0	7.748	3	1	3	1	596	65	4.28	0.0175056	0	0	0	0.0322673	0	0.0206842	0	0	0	0	0	0	0	0	0	0	0	0	0	0	0
CBBNIB_07480	hypothetical protein	0	23.458	41	5	8	5	282	30.4	4.21	0	0	0	0	0	0	0	0	0	0.0248181	0	0	0	0	0.171807	0	0	0	0.0858879	0	0	0
CBBNIB_07460	Deacylase	0.001	3.715	12	2	3	2	295	32	5.1	0	0	0	0	0	0	0	0	0	0	0	0	0	0	0.0328471	0	0	0	0.082103	0	0	0
CBBNIB_07445	hypothetical protein	0.034	1.611	17	1	1	1	82	8.9	4.59	0.127235	0	0	0	0	0	0	0	0	0	0	0	0	0	0	0	0	0	0	0	0	0
CBBNIB_07440	hypothetical protein	0	11.169	28	2	2	2	265	29	4.51	0	0	0	0	0	0	0	0	0	0	0	0	0	0	0	0	0	0	0.0913977	0	0	0
CBBNIB_07375	hypothetical protein	0.049	1.435	6	1	1	1	442	48.3	4.91	0	0	0	0	0	0	0	0.146537	0	0	0	0	0	0	0	0	0	0	0	0	0	0
CBBNIB_07355	hypothetical protein	0	42.424	28	7	49	7	240	25.3	4.22	0.0869442	0	0	0.981839	0	0	0	0	0	0.116645	0	0.232387	0	0	0.363371	0	0	0	1.51377	0	0	0
CBBNIB_07350	hypothetical protein	0	11.624	8	2	3	2	369	38.2	4.34	0	0	0	0	0	0	0	0	0	0	0	0	0	0	0.0787796	0	0	0	0	0	0	0
CBBNIB_07340	hypothetical protein	0	14.276	30	6	11	6	353	37.1	4.59	0.0295561	0	0	0	0	0	0	0	0	0	0	0	0	0	0.274501	0	0	0	0	0	0	0
CBBNIB_07335	hypothetical protein	0	6.421	6	3	4	3	724	76	4.12	0.0144106	0	0	0	0.0796878	0	0	0	0	0	0	0	0	0	0	0	0	0	0	0	0	0
CBBNIB_07330	hypothetical protein	0.023	1.894	4	1	1	1	591	63.6	4.49	0	0	0	0	0	0	0	0	0	0	0	0	0	0	0.0163958	0	0	0	0	0	0	0
CBBNIB_07305	hypothetical protein	0	116.625	12	8	1189	8	1001	104.2	3.54	4.96129	37.5798	67.2171	10.1225	1.67145	9.6816	0.566513	2.45878	1.59314	0.307635	3.56938	0.148579	0.693139	0.927909	1.13258	0.0749277	0	0	0.0604905	3.15411	3.72973	0
CBBNIB_07295	hypothetical protein	0	11.378	10	3	6	3	544	56.8	4.25	0	0	0	0	0	0	0.113307	0.119061	0	0	0	0	0	0	0	0	0	0	0	0	0	0
CBBNIB_07270	hypothetical protein	0	8.15	4	2	14	2	589	61.6	4.54	0.088568	0	0	0	0.0653016	0	0.0418601	0	0	0.0237647	0	0.0631272	0	0	0.0164514	0	0	0	0	0	0	0
CBBNIB_07260	hypothetical protein	0	31.548	15	10	15	10	1031	111.1	4.46	0.111316	0	0	0	0.0559592	0	0	0	0	0.00678826	0	0	0	0	0	0	0	0	0	0	0	0
CBBNIB_07255	hypothetical protein	0.012	2.451	8	1	1	1	164	17.4	4.39	0	0	0	0	0	0	0	0	0	0	0	0	0	0	0.0590847	0	0	0	0	0	0	0
CBBNIB_07250	CoA ester lyase	0	53.468	46	10	91	10	303	32.6	4.44	0.137733	0	0	1.55539	0.0634697	0	0.0813717	0	0	0.138588	0	0.0613563	0	0	0.991375	0	0	0	1.75858	0	0	0
CBBNIB_07240	hypothetical protein	0	8.744	19	4	7	4	351	37	4.79	0.0297245	0	0	0	0	0	0	0	0	0.0398786	0	0	0	0	0.0276065	0	0	0	0.103506	0	0	0
CBBNIB_07200	Formaldehyde dismutase	0.001	3.899	13	2	2	2	350	36.8	4.56	0	0	0	0	0	0	0	0	0	0	0	0	0	0	0.0553708	0	0	0	0	0	0	0
CBBNIB_07195	hypothetical protein	0	10.268	12	4	11	4	327	34.8	9.31	0	0	0	0	0	0	0	0	0	0.0214027	0	0.0568531	0	0	0.0888981	0	0	0	0.222205	0	0	0
CBBNIB_07185	hypothetical protein	0.021	2.121	5	1	1	1	338	35	4.39	0	0	0	0	0	0	0	0	0	0	0	0	0	0	0.0286683	0	0	0	0	0	0	0
CBBNIB_07170	hypothetical protein	0.03	1.715	5	1	1	1	404	42	4.97	0	0	0	0	0	0	0	0	0	0	0	0	0	0	0.0239849	0	0	0	0	0	0	0
CBBNIB_07160	Glutathione import ATP-binding protein GsiA	0.001	3.423	5	2	3	2	714	77.6	4.64	0.0146125	0	0	0	0	0	0	0	0.114539	0	0	0	0	0	0	0	0	0	0	0	0	0
CBBNIB_07150	Glutathione transport system permease protein GsiC	0	5.846	6	2	8	2	325	34.8	10.05	0.0963075	0	0	0	0.0591733	0	0.0758634	0	0	0.0215344	0	0.057203	0	0	0	0	0	0	0	0	0	0
CBBNIB_07145	hypothetical protein	0	81.862	40	11	75	11	552	60.5	4.3	0.0189009	0	0	0	0.209036	0	0.781654	0	0	0.304291	0	0.269434	0	0	0.0175542	0	0	0	0	0	0	0
CBBNIB_07140	hypothetical protein	0.001	3.498	5	1	2	1	260	27.1	4.39	0	0	0	0	0	0	0	0	0	0	0	0	0	0	0	0	0	0	0.0931554	0	0	0
CBBNIB_07095	hypothetical protein	0	9.308	10	3	3	3	517	53.7	4.65	0	0	0	0	0	0	0	0	0	0.0406114	0	0	0	0	0	0	0	0	0	0	0	0
CBBNIB_07090	hypothetical protein	0	6.146	4	1	1	1	537	56.1	3.92	0	0	0	0	0	0	0.0229568	0	0	0	0	0	0	0	0	0	0	0	0	0	0	0
CBBNIB_07075	hypothetical protein	0	7.496	7	2	2	2	481	49.7	5.21	0.0433817	0	0	0	0	0	0	0	0	0	0	0	0	0	0	0	0	0	0	0	0	0
CBBNIB_07050	hypothetical protein	0.038	1.544	4	1	1	1	530	54.8	4.44	0	0	0	0	0	0	0	0	0	0.0132051	0	0	0	0	0	0	0	0	0	0	0	0
CBBNIB_07045	hypothetical protein	0	10.152	3	2	3	2	885	91.5	4.45	0	0	0	0	0.0651909	0	0	0	0	0	0	0	0	0	0	0	0	0	0	0	0	0
CBBNIB_07040	hypothetical protein	0	8.679	7	2	12	2	362	37.3	4.41	0.0864639	0	0	0	0.0531252	0	0	0	0	0.0386668	0	0.154069	0	0	0.0535353	0	0	0	0.0334536	0	0	0
CBBNIB_07030	hypothetical protein	0	30.863	43	11	29	11	337	38.1	4.78	0.0928781	0	0	0	0	0	0	0	0	0.0623029	0	0.220664	0	0	0.546314	0	0	0	0	0	0	0
CBBNIB_07020	hypothetical protein	0	28.579	10	3	17	3	322	34.8	4.84	0.259213	0	0	0	0.298623	0	0.0382851	0	0	0.0217351	0	0	0	0	0	0	0	0	0.0752186	0	0	0
CBBNIB_07015	hypothetical protein	0	17.236	25	3	4	3	274	29.6	4.6	0.0380778	0	0	0	0.0701873	0	0	0	0	0	0	0	0	0	0	0	0	0	0.0883956	0	0	0
CBBNIB_07010	hypothetical protein	0	54.882	31	5	64	5	333	35.8	3.9	0.0626625	0.520577	0	1.41526	0.173255	0	0.259143	0	0	0.231188	0	0.89326	0	4.88127	0.145494	0	0	0	0.36367	0	0	0
CBBNIB_06980	Thioredoxin	0.001	3.56	63	3	3	3	89	10	4.09	0.234456	0	0	0	0	0	0.138515	0	0	0	0	0	0	0	0	0	0	0	0	0	0	0
CBBNIB_06950	hypothetical protein	0	79.916	31	14	48	14	757	79.5	4.25	0.0413473	0	0	0	0.0254047	0	0.0488552	0	0	0.212642	0	0.343822	0	0	0.0512015	0	0	0	0	0	0	0
CBBNIB_06940	Leucine--tRNA ligase	0	13.906	4	3	3	3	910	101.8	4.37	0.0343955	0	0	0	0	0	0	0	0	0	0	0	0	0	0	0	0	0	0	0	0	0
CBBNIB_06920	hypothetical protein	0	63.694	23	8	91	8	501	50.8	6.42	0.791349	0	0	0	0.537402	0	0.196851	0	0.0816178	0.0977861	0	0.111323	0	0	0.193411	0	0	0	0.24172	0	0	0
CBBNIB_06905	hypothetical protein	0	10.481	32	3	4	3	233	26.2	4.58	0.0447781	0	0	0	0	0	0	0	0	0.0300373	0	0.0797895	0	0	0	0	0	0	0.0519751	0	0	0
CBBNIB_06900	hypothetical protein	0	136.199	44	14	120	14	474	52.8	4.17	0.330168	0	0	0	0.0405724	0	0.0520161	0	0	1.37316	0	0.0784429	0	0	0.122657	0	0	0	0.0255489	0	0	0
CBBNIB_06895	hypothetical protein	0	120.33	60	20	146	20	485	53.8	4.28	0.451752	0	0	0.485859	0.396522	0	1.77927	0.534181	0.421552	0.331897	0	0.0766638	0	0	0.0199792	0	0	0	0.224725	0	0	0
CBBNIB_06885	hypothetical protein	0	150.328	70	15	100	15	348	38.7	4.58	0.0899423	0	0	1.35426	0.0552624	0	0.141699	0	0	0.0603336	0	0.0534223	0	0	0.751802	0	0	0	2.05317	0	0	0
CBBNIB_06880	hypothetical protein	0	79.559	70	10	35	10	192	21.6	4.15	0	0	0	1.2273	0.100163	0	0.0642073	0	0	0.0364515	0	0	0	0	0.201873	0	0	0	1.703	0	0	0
CBBNIB_06870	hypothetical protein	0	14.672	8	5	23	5	742	80.1	4.3	0.154672	0	0	0	0.0777547	0	0.0498429	0	0	0.0377288	0	0.0250552	0	0	0.0130592	0	0	0	0	0	0	0
CBBNIB_06865	hypothetical protein	0	6.041	17	1	2	1	118	13.5	4.23	0.176836	0	0	0	0	0	0	0	0	0	0	0	0	0	0	0	0	0	0	0	0	0
CBBNIB_06860	hypothetical protein	0	39.224	18	6	65	6	561	56.2	3.76	0.260368	0	0	0	0.205683	0	0.175798	0.346361	0	0.187131	0	0.165695	0	0	0.172725	0	0	0	0.0863472	0	0	0
CBBNIB_06830	Xaa-Pro aminopeptidase	0.037	1.56	6	1	3	1	397	41.9	4.77	0	0	0	0	0.0968833	0	0.0310524	0	0	0	0	0	0	0	0	0	0	0	0	0	0	0
CBBNIB_06800	hypothetical protein	0	22.71	24	5	22	5	277	28.3	4.84	0.0753307	0	0	0	0.0694272	0	0.0890094	0	0	0.176862	0	0.0671154	0	0	0.209889	0	0	0	0.131157	0	0	0
CBBNIB_06795	hypothetical protein	0	9.272	7	3	4	3	433	49.8	4.54	0	0	0	0	0	0	0	0	0	0.0646531	0	0	0	0	0	0	0	0	0	0	0	0
CBBNIB_06745	hypothetical protein	0	4.932	6	2	2	2	581	61.5	4.04	0	0	0	0	0	0	0	0.222959	0	0	0	0	0	0	0	0	0	0	0	0	0	0
CBBNIB_06710;CBBNIB_13775	Branched-chain-amino-acid aminotransferase;Branched-chain-amino-acid aminotransferase	0	67.001	32	7	23	7	304	34.1	4.4	0.0343201	0	0	0	0	0	0	0	0	0	0	0	0	0	0.0637493	0	0	0	0.796723	0	0	0
CBBNIB_06705;CBBNIB_13780	hypothetical protein;hypothetical protein	0	4.054	7	1	7	1	235	25.2	4.82	0.133191	0	0	0	0	0	0	0	0	0.0595633	0	0.0791105	0	0	0	0	0	0	0.0515328	0	0	0
CBBNIB_06700;CBBNIB_13785	hypothetical protein;hypothetical protein	0	6.798	14	2	4	2	279	31.1	4.65	0.0373954	0	0	0	0	0	0	0	0	0.0250849	0	0.0666343	0	0	0.0347308	0	0	0	0	0	0	0
CBBNIB_06685;CBBNIB_13800	hypothetical protein;hypothetical protein	0.01	2.734	3	2	3	2	614	69.5	4.42	0.0169924	0	0	0	0	0	0.0200779	0	0	0	0	0	0	0	0	0	0	0	0.0197234	0	0	0
CBBNIB_06680;CBBNIB_13805	hypothetical protein;hypothetical protein	0.021	2.085	3	1	1	1	461	48.6	4.77	0	0	0	0	0	0	0	0	0	0.0151815	0	0	0	0	0	0	0	0	0	0	0	0
CBBNIB_06655;CBBNIB_13830	hypothetical protein;hypothetical protein	0	24.806	25	6	12	6	368	37.8	4.46	0.113406	0	4.35328	0	0.052259	0	0	0	0	0	0	0.101038	0	0	0.0789937	0	0	0	0.0329081	0	0	0
CBBNIB_06615;CBBNIB_13870	hypothetical protein;hypothetical protein	0.036	1.584	3	1	1	1	1073	113.1	4.97	0	0	0	0	0	0	0	0	0	0	0	0	0	0	0.00903065	0	0	0	0	0	0	0
CBBNIB_06600;CBBNIB_13885	hypothetical protein;hypothetical protein	0	22.884	23	4	16	4	391	40.8	4.63	0.133418	0	0	0	0.049185	0	0.0315289	0	0	0.0894974	0	0.0475472	0	0	0.074347	0	0	0	0	0	0	0
CBBNIB_06505;CBBNIB_13980	Binding-protein-dependent transport systems inner membrane component;Binding-protein-dependent transport systems inner membrane component	0	5.537	4	2	2	2	536	57.7	8.54	0.0194651	0	0	0	0	0	0	0	0	0	0	0	0	0	0.0180782	0	0	0	0	0	0	0
CBBNIB_06455;CBBNIB_14030	hypothetical protein;hypothetical protein	0.013	2.337	35	1	1	1	102	11.4	4.7	0.102287	0	0	0	0	0	0	0	0	0	0	0	0	0	0	0	0	0	0	0	0	0
CBBNIB_06450;CBBNIB_14035	hypothetical protein;hypothetical protein	0	150.549	55	14	145	14	421	45.7	4.54	0.991288	1.64705	0	0.559718	0.548161	0	0.439233	0	0	0.96419	0	0.441591	0	0	0.0690491	0	0	0	0.0575306	0	0	0
CBBNIB_06400;CBBNIB_14085	Catalase-peroxidase 2;Catalase-peroxidase 2	0	27.404	8	5	15	5	709	78.8	4.22	0.0588621	0.244502	0	0	0.0813737	0	0.0173876	0.365413	0	0.00987122	0	0	0	0	0.013667	0	0	0	0	0	0	0
CBBNIB_06395;CBBNIB_14090	hypothetical protein;hypothetical protein	0	36.258	32	6	17	6	475	49.4	4.37	0	0	0	0	0	0	0	0	0	0.25048	0	0	0	0	0	0	0	0	0	0	0	0
CBBNIB_06390;CBBNIB_14095	hypothetical protein;hypothetical protein	0	21.632	21	5	12	5	545	56.9	4.35	0.0382874	0	0	0	0.105861	0	0.135719	0	0	0.0128416	0	0	0	0	0	0	0	0	0	0	0	0
CBBNIB_06385;CBBNIB_14100	Pyruvate dehydrogenase E1 component beta subunit;Pyruvate dehydrogenase E1 component beta subunit	0	69.639	57	11	67	11	328	35.7	4.72	0.127235	0	0	0	0.117264	0	0.0751695	0	0	0.042675	0	0.0566798	0	0	0.531762	0	0	0	1.40301	0	0	0
CBBNIB_06280;CBBNIB_14205	hypothetical protein;hypothetical protein	0.001	3.9	12	2	3	2	365	39.4	4.27	0.0285844	0	0	0	0	0	0	0	0	0	0	0.101868	0	0	0	0	0	0	0	0	0	0
CBBNIB_06265;CBBNIB_14220	hypothetical protein;hypothetical protein	0	10.791	12	2	21	2	127	13.9	5.2	0.492912	0	0	0	0.302856	0	0.291208	0	0	0.165323	0	0.146386	0	0	0.305193	0	0	0	0.190712	0	0	0
CBBNIB_06240;CBBNIB_14245	hypothetical protein;hypothetical protein	0	92.016	33	8	56	8	503	52	4.2	0.0622265	0	0	0	0.0764665	0	0.0735257	0	0	0.333934	1.42066	0.554402	0	0	0.154114	0	0	0	0	0	0	0
CBBNIB_06235;CBBNIB_14250	Aconitate hydratase A;Aconitate hydratase A	0	30.061	18	6	21	6	661	70.8	4.31	0.157841	0	0	0	0.174566	0	0.0559507	0	0	0.0211761	0	0	0	0	0	0	0	0	0	0	0	0
CBBNIB_06230;CBBNIB_14255	hypothetical protein;hypothetical protein	0	8.7	18	2	4	2	217	23.7	4.84	0.0961595	0	0	0	0.0886236	0	0	0	0	0	0	0.0856726	0	0	0	0	0	0	0	0	0	0
CBBNIB_06205;CBBNIB_14280	hypothetical protein;hypothetical protein	0.001	3.479	13	3	4	3	609	67.7	4.87	0	0	0	0	0	0	0.0202427	0	0.134287	0	0	0	0	0	0	0	0	0	0.0198854	0	0	0
CBBNIB_06200;CBBNIB_14285	hypothetical protein;hypothetical protein	0	23.509	25	9	11	9	521	59.2	4.93	0	0	0	0	0	0	0	0	0	0.147765	0	0	0	0	0	0	0	0	0	0	0	0
CBBNIB_06185	hypothetical protein	0.001	3.917	4	1	5	1	162	17.5	4.32	0.128806	0	0	0	0	0	0.0760976	0	0	0.0432018	0	0	0	0	0	0	0	0	0.0747543	0	0	0
CBBNIB_06175	NADP-dependent malic enzyme	0	37.292	19	9	47	9	750	81.1	4.56	0.111289	0	0	0	0.256418	0	0.328741	0.259078	0	0.046658	0	0	0	0	0.0129199	0	0	0	0	0	0	0
CBBNIB_06145	hypothetical protein	0.01	2.739	23	2	3	2	93	10	4.56	0.336558	0	0	0	0	0	0	0	0	0	0	0	0	0	0	0	0	0	0	0	0	0
CBBNIB_06140	hypothetical protein	0.021	2.023	10	1	2	1	127	14.5	4.35	0.082152	0	0	0	0.151428	0	0	0	0	0	0	0	0	0	0	0	0	0	0	0	0	0
CBBNIB_06130	hypothetical protein	0	12.504	18	5	8	5	315	34.3	4.88	0	0	0	0	0.0610518	0	0	0	0	0	0	0	0	0	0.0922847	0	0	0	0.15378	0	0	0
CBBNIB_06125	hypothetical protein	0	20.186	13	5	28	5	626	65.2	4.59	0.15	0	0	0	0.0921629	0	0.0590789	0	0	0.0447201	0	0.14849	0	0.370941	0.0309581	0	0	0	0.0193454	0	0	0
CBBNIB_06120	Cystathionine gamma-synthase	0	8.017	14	3	4	3	401	43.3	4.45	0.0780547	0	0	0	0	0	0	0	0	0.0174531	0	0	0	0	0	0	0	0	0	0	0	0
CBBNIB_06110	Peptidyl-prolyl cis-trans isomerase	0	4.181	5	1	10	1	217	23.7	4.73	0.0480798	0	0	0	0.177247	0	0.11362	0	0	0.0645041	0	0.0856726	0	0	0.0446539	0	0	0	0.0558074	0	0	0
CBBNIB_06100	hypothetical protein	0	8.393	18	1	1	1	160	16.6	4.35	0.0652082	0	0	0	0	0	0	0	0	0	0	0	0	0	0	0	0	0	0	0	0	0
CBBNIB_06065	hypothetical protein	0	20.91	14	5	23	5	515	53	4.03	0.141812	0	0	0	0.112027	0	0.047875	0	0	0.0543588	0	0.0721979	0	0	0.056446	0	0	0	0.0470299	0	0	0
CBBNIB_06045	hypothetical protein	0	17.956	21	3	9	3	241	25.7	3.85	0	0	0	0	0	0	0	0	0	0	0	0	0	0	0.160828	0	0	0	0.251249	0	0	0
CBBNIB_06035	hypothetical protein	0	21.411	40	7	12	7	434	49.1	4.27	0.0240399	0	0	0	0.0443118	0	0	0	0	0.16126	0	0	0	0	0	0	0	0	0	0	0	0
CBBNIB_06025	hypothetical protein	0	16.686	12	2	3	2	464	48.8	4.72	0.0449712	0	0	0	0	0	0	0	0	0.0150834	0	0	0	0	0	0	0	0	0	0	0	0
CBBNIB_06015	hypothetical protein	0	11.523	11	5	20	5	740	81.5	4.72	0.0563963	0.702779	0	0.318434	0.0519766	0	0.166592	0	0	0	0	0	0	0	0	0	0	0	0	0	0	0
CBBNIB_05995	hypothetical protein	0	32.934	31	10	30	10	338	37.5	4.63	0	0	0	0	0	0	0	0	0	0.0414124	0	0.0550029	0	0	0.745376	0	0	0	0.035829	0	0	0
CBBNIB_05990	Carbamoyl-phosphate synthase large chain	0	9.98	3	3	5	3	1076	115.9	4.28	0.0387855	0	0	0	0	0	0	0	0	0	0	0	0	0	0.00900547	0	0	0	0	0	0	0
CBBNIB_05985	hypothetical protein	0.021	2.023	3	1	1	1	382	40.1	5.07	0	0	0	0	0	0	0	0	0	0	0	0.0486674	0	0	0	0	0	0	0	0	0	0
CBBNIB_05910	hypothetical protein	0	5.122	6	2	6	2	350	38.5	4.53	0	0	0	0	0	0	0	0	0	0	0	0.106234	0	0	0.110742	0	0	0	0	0	0	0
CBBNIB_05905	hypothetical protein	0	9.625	12	1	1	1	225	23.9	4.5	0.0463703	0	0	0	0	0	0	0	0	0	0	0	0	0	0	0	0	0	0	0	0	0
CBBNIB_05900	hypothetical protein	0	29.31	22	6	29	6	362	38.4	5.11	0.115285	0	0	0	0.0531252	0	0.0340547	0	0	0.0386668	0	0	0	0	0.535353	0	0	0	0.0334536	0	0	0
CBBNIB_05895	hypothetical protein	0	6.547	4	2	7	2	560	58.2	4.27	0.0558927	0	0	0	0.0343417	0	0	0	0.0730188	0.0124977	0	0.0331981	0	0	0	0	0	0	0	0	0	0
CBBNIB_05880	DUF418 domain-containing protein	0	6.828	4	2	5	2	406	44.9	9.2	0.0513956	0	0	0	0.0473678	0	0.0303641	0	0	0.0172382	0	0	0	0	0	0	0	0	0	0	0	0
CBBNIB_05875	hypothetical protein	0	33.569	46	11	33	11	419	43.6	4.44	0.0249005	0	0	0	0	0	0	0	0	0.10022	0	0.709917	0	0	0.115631	0	0	0	0.144513	0	0	0
CBBNIB_05830	hypothetical protein	0	39.123	14	4	24	4	581	57.5	4.55	0	0	0	0	0	0	0.106091	0	0	0.228873	0	0	0	0	0	0	0	0	0	0	0	0
CBBNIB_05820	Succinate-semialdehyde dehydrogenase (NADP(+))	0	25.1	14	8	10	8	545	57.8	4.72	0.0191437	0	0	0	0	0	0	0	0	0.115575	0	0	0	0	0	0	0	0	0	0	0	0
CBBNIB_05815	hypothetical protein	0.001	3.879	3	1	5	1	346	36	5.96	0.0603081	0	0	0	0.0555819	0	0	0	0	0.0202274	0	0	0	0	0.0280055	0	0	0	0	0	0	0
CBBNIB_05795	hypothetical protein	0.022	2.189	6	1	9	1	125	14.2	5.1	0.166933	0	0	0	0.307701	0	0.197245	0	0	0.0559895	0	0.148728	0	0	0.0775191	0	0	0	0	0	0	0
CBBNIB_05775	hypothetical protein	0	4.989	14	3	4	3	532	57.2	4.44	0	0	0	0	0	0	0	0	0	0.0526218	0	0	0	0	0	0	0	0	0	0	0	0
CBBNIB_05765	hypothetical protein	0	14.148	23	5	5	5	324	34.1	4.63	0	0	0	0	0	0	0	0	0	0	0	0	0	0	0.149535	0	0	0	0	0	0	0
CBBNIB_05700	hypothetical protein	0.001	3.501	11	1	1	1	151	14.9	9.69	0.0690948	0	0	0	0	0	0	0	0	0	0	0	0	0	0	0	0	0	0	0	0	0
CBBNIB_05685	hypothetical protein	0	5.741	20	1	3	1	134	14	4.75	0.155721	0	0	0	0	0	0	0	0	0	0	0.138739	0	0	0	0	0	0	0	0	0	0
CBBNIB_05670	hypothetical protein	0	5.53	8	2	2	2	436	49	4.72	0	0	0	0	0	0	0.0282748	0	0	0	0	0.0426398	0	0	0	0	0	0	0	0	0	0
CBBNIB_05665	hypothetical protein	0	11.762	11	3	3	3	410	43	4.39	0	0	0	0	0	0	0	0	0	0.0512099	0	0	0	0	0	0	0	0	0	0	0	0
CBBNIB_05655	hypothetical protein	0	6.484	5	3	9	3	633	69.8	4.4	0	0	0	0	0.0911437	0	0.097376	0.102321	0	0	0	0	0	0	0	0	0	0	0	0	0	0
CBBNIB_05645	hypothetical protein	0	4.114	2	2	3	2	951	104.7	4.48	0.0219418	0	0	0	0.0202222	0	0	0	0	0	0	0	0	0	0	0	0	0	0	0	0	0
CBBNIB_05640	hypothetical protein	0	157.174	80	14	182	14	290	32.6	4.2	0.359769	0.597766	0	0	0.464204	0	0.255058	0	0	0.337868	0	0.833388	0	0	4.27692	0.25863	0	0	0.0835186	0	0	0
CBBNIB_05615	hypothetical protein	0	118.899	57	14	213	14	409	43.2	3.97	0.306112	0.423844	0	1.15228	1.12849	0	1.98933	0.950163	0	0.410681	0	0.454547	0	0	0.450142	0	0	0	1.45085	0	0	0
CBBNIB_05610	hypothetical protein	0	23.599	19	7	32	7	633	64.8	4.3	0.0988939	0	0	0	0.121525	0	0.233702	0	0.258392	0.0442255	0	0	0	0	0.0306158	0	0	0	0	0	0	0
CBBNIB_05595	hypothetical protein	0	5.785	7	2	3	2	584	60	3.98	0	0	0	0	0	0	0.0422185	0	0.070018	0	0	0	0	0	0	0	0	0	0	0	0	0
CBBNIB_05590	5,10-methylenetetrahydromethanopterin reductase	0	18.444	27	6	11	6	327	34.3	4.63	0.0319061	0	0	0	0.0588114	0	0.0376997	0	0	0.0428055	0	0.0568531	0	0	0.148163	0	0	0	0	0	0	0
CBBNIB_05585	hypothetical protein	0	6.326	10	2	3	2	251	27.4	4.55	0.041567	0	0	0	0	0	0	0	0	0.0557665	0	0	0	0	0	0	0	0	0	0	0	0
CBBNIB_05565	hypothetical protein	0	5.256	4	3	9	3	806	82.2	4.31	0.0258891	0	0	0	0.0238602	0	0.015295	0	0	0.0173665	0	0	0	0	0.0120222	0	0	0	0.0300501	0	0	0
CBBNIB_05555	hypothetical protein	0.024	1.848	21	1	1	1	99	11	4.88	0	0	0	0	0	0	0.124523	0	0	0	0	0	0	0	0	0	0	0	0	0	0	0
CBBNIB_05540	hypothetical protein	0	5.273	9	1	2	1	226	24.2	4.6	0	0	0	0	0	0	0	0	0	0	0	0.0822609	0	0	0	0	0	0	0.0535849	0	0	0
CBBNIB_05530	hypothetical protein	0	7.318	9	3	9	3	334	36.9	5.17	0.0624749	0	0	0	0	0	0	0	0	0.0209542	0	0	0	0	0.0580233	0	0	0	0.145032	0	0	0
CBBNIB_05525	hypothetical protein	0.021	2.113	13	1	1	1	327	33.9	6.2	0	0	0	0	0	0	0	0	0	0	0	0.0568531	0	0	0	0	0	0	0	0	0	0
CBBNIB_05515	hypothetical protein	0	8.046	7	1	1	1	412	45.2	4.6	0	0	0	0	0	0	0	0	0	0	0	0.0451237	0	0	0	0	0	0	0	0	0	0
CBBNIB_05480	hypothetical protein	0	12.873	12	2	4	2	380	40.6	4.4	0.0274561	0	0	0	0	0	0	0	0	0	0	0.0489236	0	0	0.0509994	0	0	0	0	0	0	0
CBBNIB_05460	Alpha/beta hydrolase	0	12.671	32	5	5	5	318	34.1	5.12	0	0	0	0	0	0	0	0	0	0	0	0	0	0	0.152357	0	0	0	0	0	0	0
CBBNIB_05430	hypothetical protein	0.047	1.454	3	1	1	1	943	97.9	3.61	0	0.18383	0	0	0	0	0	0	0	0	0	0	0	0	0	0	0	0	0	0	0	0
CBBNIB_05420	hypothetical protein	0	33.806	29	8	31	8	272	31.3	4.84	0.191789	0	0	0	0.141407	0	0.135968	0	0	0.385957	0	0	0	0	0.213748	0	0	0	0	0	0	0
CBBNIB_05385	hypothetical protein	0	29.526	25	8	20	8	499	55.7	4.42	0.0627253	0	0	0	0	0	0	0	0	0.224407	0	0	0	0	0.0194186	0	0	0	0	0	0	0
CBBNIB_05380	hypothetical protein	0.007	2.827	18	2	2	2	246	25.3	4.55	0.0424118	0	0	0	0	0	0	0	0	0.02845	0	0	0	0	0	0	0	0	0	0	0	0
CBBNIB_05355	hypothetical protein	0.023	1.908	2	1	2	1	483	49	10.07	0.0432021	0	0	0	0	0	0	0	0	0	0	0	0	0	0	0	0	0	0	0	0	0
CBBNIB_05350	hypothetical protein	0	30.293	33	6	43	6	285	30.6	4.55	0.366081	0	0	0	0.202435	0	0.216277	0	0	0.319239	0	0	0	0	0.237997	0	0	0	0.21246	0	0	0
CBBNIB_05335	hypothetical protein	0	48.971	32	10	99	10	392	42.1	4.55	0.612158	0.884449	4.08675	1.20225	0.294357	0	0.283036	0.165228	0.625875	0.089269	3.64587	0.806241	3.53996	3.55422	0.173034	0.382667	0	0	0.247147	0	0	0
CBBNIB_05330	hypothetical protein	0	87.899	90	16	110	16	298	31.5	4.79	0.910289	0	0	0	0.387208	0	0.206842	0	0	0.164399	0	0.499086	0	0	1.17059	0	0	0	0.894041	0	0	0
CBBNIB_05325	hypothetical protein	0	16.294	20	3	6	3	290	29.4	4.63	0.0359769	0	0	0	0	0	0	0	0	0	0	0	0	0	0.0668268	0	0	0	0.125278	0	0	0
CBBNIB_05320	hypothetical protein	0.001	3.595	3	1	1	1	459	48.2	4.45	0.0227305	0	0	0	0	0	0	0	0	0	0	0	0	0	0	0	0	0	0	0	0	0
CBBNIB_05300	hypothetical protein	0	5.063	8	2	2	2	436	46.6	4.2	0	0	0	0	0	0	0	0	0	0.0321041	0	0	0	0	0	0	0	0	0	0	0	0
CBBNIB_05260	hypothetical protein	0	66.243	43	14	54	14	560	60.4	4.25	0	0.928672	0	0	0	0	0.0440279	4.62639	0	0	0	0	0	0	0	0	0	0	0	1.1276	0	0
CBBNIB_05240	hypothetical protein	0	47.653	45	6	75	6	161	17.8	5.57	1.94409	0	0	0	0.358348	0	0.229711	0	0	0.173881	0	0.577359	0	0	0.662042	0	0	0	1.42915	0	0	0
CBBNIB_05235	hypothetical protein	0	10.942	27	6	8	6	330	38.1	4.61	0.0316161	0	0	0	0	0	0	0	0	0	0	0	0	0	0.205543	0	0	0	0	0	0	0
CBBNIB_05195	Alpha/beta hydrolase	0	21.524	26	5	16	5	318	35.5	5.29	0.0328091	0	0	0	0	0	0.0775334	0	0	0	0	0.116924	0	0	0.243771	0	0	0	0.114247	0	0	0
CBBNIB_05155	hypothetical protein	0	9.778	11	3	3	3	425	45.3	3.99	0	0	0	0	0	0	0	0	0	0	0	0.13123	0	0	0	0	0	0	0	0	0	0
CBBNIB_05125	2-deoxy-D-gluconate 3-dehydrogenase	0	8.772	24	3	3	3	269	27.3	4.58	0	0	0	0	0	0	0	0	0	0	0	0	0	0	0	0	0	0	0.135058	0	0	0
CBBNIB_05105	hypothetical protein	0	9.635	12	3	12	3	245	26.9	6.4	0.0851699	0	0	0	0	0	0.0503176	0	0	0.0856983	0	0	0	0	0.197753	0	0	0	0.0494294	0	0	0
CBBNIB_05025	hypothetical protein	0	10.315	11	2	8	2	176	18.8	10.1	0.11856	0	0	0	0	0	0	0	0	0.0795306	0	0.211261	0	0	0	0	0	0	0.137616	0	0	0
CBBNIB_05020	hypothetical protein	0	7.926	35	3	23	3	220	23.2	4.34	0.0948483	0	0	0	0.0874151	0	0.168106	0	0	0.127249	0	0.507026	0	0	0.17618	0	0	0	0.165139	0	0	0
CBBNIB_04995	hypothetical protein	0	18.868	12	5	17	5	558	60.9	4.44	0.149581	0	0	0	0	0	0.0220928	0	0	0.0877972	0	0	0	0	0.0173654	0	0	0	0	0	0	0
CBBNIB_04990	YccF domain-containing protein	0	5.004	19	2	10	2	125	14	11.25	0.417332	0	0	0	0.307701	0	0	0	0	0.0559895	0	0	0	0	0	0	0	0	0.193763	0	0	0
CBBNIB_04985	hypothetical protein	0.012	2.466	15	2	10	2	187	20.6	4.92	0	7.41613	0	0	0	10.365	0	0	0	0.0374262	0	0	0	0	0	0	0	0	0	0	0	0
CBBNIB_04975	hypothetical protein	0	23.832	17	10	16	10	828	89.8	4.5	0	0	0	0	0.0232262	0	0.193553	0	0	0.0169051	0	0	0	0	0	0	0	0	0	0	0	0
CBBNIB_04950	Ring-cleaving dioxygenase	0	8.228	12	2	4	2	340	37.3	4.55	0.0306862	0	0	0	0	0	0	0	0	0	0	0.0546793	0	0	0.0569994	0	0	0	0	0	0	0
CBBNIB_04930	hypothetical protein	0.021	2.059	12	1	1	1	269	26.9	9.95	0	0	0	0	0.0714919	0	0	0	0	0	0	0	0	0	0	0	0	0	0	0	0	0
CBBNIB_04895	hypothetical protein	0	10.825	7	4	22	4	464	48	4.74	0.157399	0	0	0	0.0414468	0	0.0531371	0	0	0.0452502	0	0	0	0	0.18795	0	0	0	0	0	0	0
CBBNIB_04855	hypothetical protein	0	51.95	40	11	20	11	450	48.3	4.7	0.0463703	0	0	0	0	0	0.0273951	0	0	0.264395	0	0	0	0	0	0	0	0	0	0	0	0
CBBNIB_04840	hypothetical protein	0	9.39	12	6	10	6	659	70.8	4.34	0.0316641	0	0	0	0.0875478	0	0.0935342	0	0	0	0	0	0	0	0	0	0	0	0	0	0	0
CBBNIB_04835	hypothetical protein	0.008	2.789	4	1	3	1	348	36.8	4.32	0	0	0	0	0	0	0	0	0	0.0201112	0	0.0534223	0	0	0.0278445	0	0	0	0	0	0	0
CBBNIB_04830	hypothetical protein	0	6.049	9	3	6	3	561	58.6	4.63	0.0371954	0	0	0	0.0342804	0	0	0	0	0	0	0	0	0	0.0172725	0	0	0	0	2.25117	0	0
CBBNIB_04780	hypothetical protein	0	193.544	49	13	463	13	274	29.9	3.92	0.304622	1.89802	0	7.74005	0.280749	0	0.089984	0	0.149235	0.204341	0	0.407101	0	0	2.7938	0	1.72845	0	14.9831	0	0	0
CBBNIB_04775	hypothetical protein	0	17.103	18	4	19	4	279	30.1	6.2	0.224372	0	0	0	0.344647	0	0.0883714	0	0	0.0501698	0	0.133269	0	0	0.0694616	0	0	0	0	0	0	0
CBBNIB_04770	Leukotoxin translocation ATP-binding protein LktB	0	16.042	23	4	21	4	242	26.4	4.61	0.172451	0	0	0	0.158937	0	0.152824	0	0	0.173521	0	0.153644	0	0	0.0800817	0	0	0	0.100084	0	0	0
CBBNIB_04765	L-threonine 3-dehydrogenase	0	5.687	14	3	3	3	355	37	4.69	0	0	0	0	0	0	0	0	0	0	0	0	0	0	0.0818864	0	0	0	0	0	0	0
CBBNIB_04750	hypothetical protein	0.05	1.42	4	1	1	1	598	68.7	4.67	0	0	0	0	0	0	0	0	0	0.0117035	0	0	0	0	0	0	0	0	0	0	0	0
CBBNIB_04740	hypothetical protein	0	4.78	6	2	8	2	406	41.8	4.35	0.0770934	0	0	0	0.142103	0	0	0	0	0	0	0.0915811	0	0	0	0	0	0	0	0	0	0
CBBNIB_04720	Alcohol dehydrogenase	0	5.61	7	2	3	2	346	36.7	4.75	0	0	0	0	0	0	0	0	0	0.0202274	0	0	0	0	0.0560109	0	0	0	0	0	0	0
CBBNIB_04695	hypothetical protein	0	14.625	18	4	12	4	250	27.6	4.28	0	0	0	0	0	0	0	0	0	0	0	0	0	0	0.465115	0	0	0	0	0	0	0
CBBNIB_04680	hypothetical protein	0	6.184	26	2	3	2	149	16.4	5.1	0	0	0	0	0	0	0	0	0	0.140913	0	0	0	0	0	0	0	0	0	0	0	0
CBBNIB_04660	hypothetical protein	0	20.297	39	6	12	6	400	41.9	4.37	0.0521665	0	0	0	0	0	0.0308195	0	0	0.0699869	0	0.232387	0	0	0	0	0	0	0	0	0	0
CBBNIB_04655	hypothetical protein	0	36.513	32	5	20	5	274	29.6	4.09	0.190389	0	0	0	0.0701873	0	0.044992	0	0	0	0	0	0	0	0.0353646	0	0	0	0.530374	0	0	0
CBBNIB_04630	Iron-sulfur cluster carrier protein	0	4.132	9	2	3	2	347	36.3	4.46	0	0	0	0	0	0	0	0	0	0	0	0	0	0	0.0837743	0	0	0	0	0	0	0
CBBNIB_04605	hypothetical protein	0	7.414	5	3	5	3	877	91.6	4.01	0	0	0	0	0.0877141	0	0	0	0	0.00798027	0	0	0	0	0	0	0	0	0	0	0	0
CBBNIB_04580	hypothetical protein	0	6.753	17	4	7	4	295	33.4	4.35	0	0	0	0	0	0	0	0	0	0	0	0	0	0	0.22993	0	0	0	0	0	0	0
CBBNIB_04575	Sugar phosphate isomerase/epimerase	0.005	3.084	7	1	1	1	323	35.5	4.69	0	0	0	0	0	0	0	0	0	0	0	0	0	0	0	0	0	0	0.0374929	0	0	0
CBBNIB_04570	Dehydrogenase	0.022	2.167	4	1	1	1	377	41.2	4.77	0	0	0	0	0	0	0	0	0	0	0	0.0493129	0	0	0	0	0	0	0	0	0	0
CBBNIB_04560	hypothetical protein	0.001	3.85	10	1	3	1	181	17.8	9.57	0.172928	0	0	0	0	0	0	0	0	0	0	0	0	0	0	0	0	0	0	0	0	0
CBBNIB_04555	hypothetical protein	0	25.347	18	7	25	7	712	76.3	4.21	0.0879211	0	0	0	0.108041	0	0.155829	0	0	0.0393185	0	0.0261109	0	0	0.0136094	0	0	0	0	0	0	0
CBBNIB_04550	hypothetical protein	0.007	2.9	5	1	4	1	193	21.3	5.01	0.108117	0	0	0	0	0	0.0638746	0	0	0.0362627	0	0	0	0	0	0	0	0	0	0	0	0
CBBNIB_04520	hypothetical protein	0	5.124	8	3	5	3	442	47.3	4.45	0	0	0	0	0	0	0	0	0	0.0316683	0	0.126183	0	0	0	0	0	0	0	0	0	0
CBBNIB_04515	hypothetical protein	0	19.218	14	4	8	4	476	51.1	4.6	0	0	0	0	0	0	0	0	0	0.117625	0	0	0	0	0	0	0	0	0	0	0	0
CBBNIB_04490	hypothetical protein	0	9.169	13	2	12	2	302	34.2	4.75	0.0345474	0	0	0	0	0	0.0816411	0	0	0.0231745	0	0.123119	0	0	0.0320857	0	0	0	0.2005	0	0	0
CBBNIB_04475	Corrinoid adenosyltransferase	0.001	3.891	6	1	2	1	177	19.6	4.77	0.11789	0	0	0	0	0	0	0	0	0	0	0	0	0	0	0	0	0	0	0	0	0
CBBNIB_04455	hypothetical protein	0	6.527	16	2	2	2	338	35.8	4.86	0	0	0	0	0	0	0	0	0	0	0	0	0	0	0.0573366	0	0	0	0	0	0	0
CBBNIB_04360	hypothetical protein	0.001	3.263	4	2	4	2	910	100	4.51	0	0	0	0.77684	0	0	0	0	0	0.00769087	0	0	0	0	0	0	0	0	0	0	0	0
CBBNIB_04310	hypothetical protein	0	14.38	19	4	14	4	224	25.3	4.25	0.232886	0	0	0	0.0858541	0	0	0	0	0.0312442	0	0	0	0	0.0865169	0	0	0	0.270317	0	0	0
CBBNIB_04305	hypothetical protein	0	158.093	54	25	315	25	543	60.5	4.18	0.172928	0	0	0	0.920837	0	4.13197	3.22058	2.78628	0.257779	0	0.068475	0	0	0.107071	0	0	0	0.0669072	0	0	0
CBBNIB_04290	hypothetical protein	0	31.976	30	5	15	5	418	41.2	4.09	0.0499201	0	0	0	0	0	0.0589847	0	0	0.184176	0	0	0	0	0	0	0	0	0	0	0	0
CBBNIB_04285	Nucleoside diphosphate kinase	0.021	1.996	6	1	1	1	159	17.9	4.45	0	0	0	0	0	0	0	0	0	0.0440169	0	0	0	0	0	0	0	0	0	0	0	0
CBBNIB_04275	hypothetical protein	0.001	3.322	11	1	2	1	74	7.9	5.38	0.140991	0	0	0	0	0	0	0	0	0	0	0	0	0	0.130944	0	0	0	0	0	0	0
CBBNIB_04270	hypothetical protein	0.034	1.627	8	1	1	1	120	12.6	4.12	0.0869442	0	0	0	0	0	0	0	0	0	0	0	0	0	0	0	0	0	0	0	0	0
CBBNIB_04240	hypothetical protein	0	30.966	21	5	29	5	276	29.5	4.65	0.0378018	0	0	0	0	0	0	0	0	0.0507152	0	0.0673586	0	0	0.491516	0	0	0	0.482653	0	0	0
CBBNIB_04225	hypothetical protein	0	22.284	20	5	11	5	379	41.7	4.72	0.0275285	0	0	0	0	0	0	0	0	0	0	0	0	0	0.25567	0	0	0	0	0	0	0
CBBNIB_04205	hypothetical protein	0	15.02	19	2	6	2	244	26.6	4.37	0	0	0	0	0	0	0	0	0	0	0	0	0	0	0.0397127	0	0	0	0.24816	0	0	0
CBBNIB_04190	hypothetical protein	0.013	2.41	6	1	3	1	218	22.7	4.15	0.0478592	0	0	0	0	0	0	0	0	0.0321041	0	0	0	0	0	0	0	0	0.0555514	0	0	0
CBBNIB_04185	hypothetical protein	0	6.189	4	1	2	1	451	47.2	4.63	0.0231337	0	0	0	0.0426415	0	0	0	0	0	0	0	0	0	0	0	0	0	0	0	0	0
CBBNIB_04180	hypothetical protein	0	12.632	19	4	17	4	462	50.2	4.44	0.0677488	0	0	0	0.0832525	0	0	0	0	0.121189	0	0.120721	0	0	0.0209738	0	0	0	0	0	0	0
CBBNIB_04175	hypothetical protein	0	10.932	8	1	1	1	374	40	4.44	0	0	0	0	0	0	0	0	0	0	0	0.0497085	0	0	0	0	0	0	0	0	0	0
CBBNIB_04145	hypothetical protein	0	11.555	16	5	14	5	368	38.3	5.01	0.19846	0	0	0	0.156777	0	0.0669989	0	0	0.0380364	0	0	0	0	0	0	0	0	0	0	0	0
CBBNIB_04140	hypothetical protein	0	10.932	7	2	8	2	428	44.6	4.35	0.0731307	0	0	0	0	0	0	0	0	0	0	0.217184	0	0	0	0	0	0	0	0	0	0
CBBNIB_04125	hypothetical protein	0	15.051	12	3	7	3	635	67.1	4.11	0.0985824	0	0	0	0	0	0	0	0	0.0110216	0	0	0	0	0	0	0	0	0	0	0	0
CBBNIB_04095	hypothetical protein	0	52.43	45	11	71	11	249	26	4.21	0.209504	0	0	0	0	0	0.148528	0	0	0.309179	0	0.223988	0	0	0.933965	0	0	0	1.21588	0	0	0
CBBNIB_04090	hypothetical protein	0	44.513	22	12	38	12	731	77.8	4.41	0.299726	0	0	0	0.0263082	0	0.101186	0	0.0559378	0.0765931	0	0.0254322	0	0	0	0	0	0	0	0	0	0
CBBNIB_04085	hypothetical protein	0	9.819	21	4	5	4	424	44.1	4.59	0	0	0	0	0	0	0.029075	0	0	0	0	0	0	0	0	0	0	0	0.114247	0	0	0
CBBNIB_04075	hypothetical protein	0	10.165	40	4	4	4	293	29.8	4.73	0	0	0	0	0	0	0	0	0	0	0	0	0	0	0	0	0	0	0.165327	0	0	0
CBBNIB_04070	hypothetical protein	0	36.198	17	11	43	10	562	60.8	6.62	0.129952	0	0	0	0.171097	0	0.0658068	0	0	0.174345	0	0.09924	0	0	0.137934	0	0	0	0.0646452	0	0	0
CBBNIB_04065	Thiol-disulfide oxidoreductase DCC family protein	0.021	2.103	17	2	2	2	138	15.5	4.96	0.0756037	0	0	0	0	0	0	0	0	0.0507152	0	0	0	0	0	0	0	0	0	0	0	0
CBBNIB_04025	hypothetical protein	0.017	2.25	10	2	2	2	308	33	4.54	0	0	0	0	0	0	0	0	0	0	0	0	0	0	0.0629214	0	0	0	0	0	0	0
CBBNIB_04005	hypothetical protein	0.001	3.654	15	2	4	2	185	20.6	4.18	0.0563963	0	0	0	0	0	0	0	0	0.0756615	0	0	0	0	0.0523778	0	0	0	0	0	0	0
CBBNIB_03980	Aspartate kinase	0	9.485	13	4	5	4	324	36.4	4.61	0	0	0	0.727288	0	0	0.0380488	0	0	0	0	0	0	0	0.0897212	0	0	0	0	0	0	0
CBBNIB_03975	hypothetical protein	0.036	1.58	9	1	1	1	274	28.4	4.72	0	0	0	0	0	0	0	0	0	0	0	0	0	0	0	0	0	0	0.0441978	0	0	0
CBBNIB_03945	hydroxymethylglutaryl-CoA reductase (NADPH)	0	4.946	4	1	4	1	407	41.6	4.65	0.076904	0	0	0	0	0	0	0	0	0	0	0.045678	0	0	0	0	0	0	0	0	0	0
CBBNIB_03935	hypothetical protein	0	11.783	9	3	12	3	270	28.6	4.31	0.0772838	0	0	0	0.0712271	0	0.0913171	0	0	0.0518422	0	0	0	0	0.0358885	0	0	0	0.17941	0	0	0
CBBNIB_03900	hypothetical protein	0	19.096	36	8	17	8	311	33.2	5.31	0.0335476	0	0	0	0.0618371	0	0.0396392	0	0	0.0225038	0	0.059778	0	0	0.0311572	0	0	0	0.428335	0	0	0
CBBNIB_03880	hypothetical protein	0.035	1.594	9	1	1	1	198	21.6	4.45	0	0	0	0	0	0	0	0	0	0	0	0.0938938	0	0	0	0	0	0	0	0	0	0
CBBNIB_03875	hypothetical protein	0	6.911	2	2	7	2	878	102.8	4.5	0.0475322	0	0	0	0.0657107	0	0	0	0	0	0	0	0	0	0	0	0	0	0	0	0	0
CBBNIB_03820	hypothetical protein	0	18.509	13	7	20	7	745	78.8	4.68	0.0700222	0	0	0	0.0774416	0	0.182021	0	0	0.00939422	0	0	0	0	0	0	0	0	0	0	0	0
CBBNIB_03805	hypothetical protein	0	17.739	13	5	8	5	456	51.9	4.45	0	0	0	0	0	0	0	0	0	0.122784	0	0	0	0	0	0	0	0	0	0	0	0
CBBNIB_03790	hypothetical protein	0	44.75	44	12	26	12	451	47.4	4.65	0	0	0	0	0	0	0.0273344	0	0	0.387954	0	0	0	0	0	0	0	0	0	0	0	0
CBBNIB_03785	AAA domain-containing protein	0	20.235	38	8	14	8	343	36.2	4.65	0.0304178	0	0	0	0	0	0	0	0	0.0204044	0	0	0	0	0.339005	0	0	0	0	0	0	0
CBBNIB_03760	hypothetical protein	0	29.458	19	4	22	4	348	37.6	4.21	0.179885	0	0	0	0	0	0	0	0	0.0603336	0	0.106845	0	0	0.30629	0	0	0	0	0	0	0
CBBNIB_03735	hypothetical protein	0.007	2.848	10	1	3	1	130	14.6	4.03	0	0	0	0	0	0	0	0	0	0.107672	0	0	0	0	0.0745376	0	0	0	0	0	0	0
CBBNIB_03730	hypothetical protein	0	5.559	5	1	3	1	290	31.6	4.92	0	0	0	0	0	0	0	0	0	0	0	0	0	0	0	0	0	0	0.125278	0	0	0
CBBNIB_03685	hypothetical protein	0	134.97	58	22	134	22	455	48.7	4.64	0.0917214	0	0	0	0.0845333	0	0.108376	0	0	1.06134	0	1.43007	0	0.51035	0.255558	0	0	0	0.186311	0	0	0
CBBNIB_03645	1,4-dihydroxy-2-naphthoyl-CoA synthase	0	6.009	16	4	4	4	312	34.4	4.77	0	0	0	0	0	0	0	0	0	0	0	0	0	0	0.124229	0	0	0	0	0	0	0
CBBNIB_03620	hypothetical protein	0	5.696	4	1	3	1	435	42.9	4.98	0.0239846	0	0	0	0.0442099	0	0	0	0	0	0	0.0427378	0	0	0	0	0	0	0	0	0	0
CBBNIB_03585	hypothetical protein	0	8.917	8	2	5	2	386	42.4	4.74	0.0270293	0	0	0	0	0	0	0	0	0	0	0.144489	0	0	0.0251033	0	0	0	0	0	0	0
CBBNIB_03575	hypothetical protein	0	10.266	5	1	1	1	439	45.8	4.37	0	0	0	0	0	0	0	0	0	0	0	0.0423484	0	0	0	0	0	0	0	0	0	0
CBBNIB_03570	hypothetical protein	0	6.239	13	3	5	3	262	27.2	4.5	0.0398218	0	0	0	0	0	0	0	0	0	0	0	0	0	0	0	0	0	0.184888	0	0	0
CBBNIB_03565	Cupin-2 domain-containing protein	0.022	2.201	10	1	1	1	115	13.1	4.37	0.0907244	0	0	0	0	0	0	0	0	0	0	0	0	0	0	0	0	0	0	0	0	0
CBBNIB_03560	FAA-hydrolase domain-containing protein	0	19.469	53	6	9	6	273	28.8	4.39	0	0	0	0	0	0	0	0	0	0	0	0.0680988	0	0	0	0	0	0	0.354878	0	0	0
CBBNIB_03550	hypothetical protein	0	340.452	51	13	987	13	363	38.7	4.12	0.316161	1.43266	0	2.5966	1.0066	0	2.10558	1.249	0.788522	15.5398	19.6857	1.07551	0	0	0.694042	0.413238	0	0	0.300253	0	0	0
CBBNIB_03545	hypothetical protein	0	10.362	5	3	7	3	703	74	6.8	0.0593645	0	0	0	0	0	0.035072	0	0	0.00995547	0	0	0	0	0	0	0	0	0	0	0	0
CBBNIB_03540	hypothetical protein	0	5.037	34	2	3	2	77	8.6	4.28	0.135498	0	0	0	0	0	0	0	0	0.181784	0	0	0	0	0	0	0	0	0	0	0	0
CBBNIB_03530	hypothetical protein	0	8.829	17	2	3	2	238	25.8	4.07	0	0	0	0	0	0	0	0	0	0	0	0	0	0	0	0	0	0	0.15265	0	0	0
CBBNIB_03525	hypothetical protein	0.001	3.652	5	1	2	1	361	39.5	4.35	0	0	0	0	0	0	0	0	0	0.019387	0	0.0514985	0	0	0	0	0	0	0	0	0	0
CBBNIB_03515	Putative circadian clock protein, KaiC	0	72.535	42	16	51	16	505	55.3	4.61	0.26858	0	0	0	0.228491	0	0.097646	0	0	0.374188	0	0.0368138	0	0	0	0	0	0	0	0	0	0
CBBNIB_03510	hypothetical protein	0	18.766	10	4	10	4	486	53.8	4.7	0.128806	0	0	0	0	0	0	0	0	0.0432018	0	0	0	0	0.019938	0	0	0	0	0	0	0
CBBNIB_03505	hypothetical protein	0	7.067	17	3	8	3	321	33.2	10.84	0.065005	0	0	0	0	0	0	0	0	0.0218028	0	0	0	0	0.0905597	0	0	0	0.0754529	0	0	0
CBBNIB_03490	hypothetical protein	0	26.753	32	5	29	5	258	28.4	4.6	0	0	0	0	0	0	0.0477822	0	0	0.0271267	0	0	0	0	0.676039	0	0	0	0.422449	0	0	0
CBBNIB_03450	hypothetical protein	0.028	1.77	4	1	1	1	220	22.9	4.74	0.0474241	0	0	0	0	0	0	0	0	0	0	0	0	0	0	0	0	0	0	0	0	0
CBBNIB_03435	hypothetical protein	0	9.592	11	3	10	3	552	58.9	4.42	0.0378018	0	0	0	0	0	0	0	0	0.0253576	0	0.168396	0	0.420669	0	0	0	0	0	0	0	0
CBBNIB_03430	hypothetical protein	0	64.433	17	3	86	3	447	46	3.64	0.0700222	0	0	0.527162	0.473254	0	1.62716	0	0.640344	0.015657	0	0.0415905	0	0	0.0216776	0.167791	0	0	0.0270922	0	0	0
CBBNIB_03425	Neutral amino acid ABC transporter ATP-binding protein	0	135.725	67	10	130	10	283	30.5	4.23	0.258068	0	0	7.4939	0.203866	0	0.39205	0	0	0.173113	0	0.26277	0	0	0.855997	0	0	0	2.82429	0	0	0
CBBNIB_03420	Lipopolysaccharide export system ATP-binding protein LptB	0	77.346	65	11	92	11	306	32.8	4.48	0.64782	0	0	0.77007	0.188542	0	0.201435	0	0.133629	0.228715	0	0.243019	0	0	0.379996	0	0	0	1.4643	0	0	0
CBBNIB_03415	hypothetical protein	0	47.655	17	7	74	7	441	45.6	4.67	0.354874	0.393089	0	0.534334	0.436085	0	0.279542	0	0.0927223	0.12696	0	0.210782	0	0	0.0878902	0	0	0	0.521754	0	0	0
CBBNIB_03410	hypothetical protein	0	28.514	13	5	59	5	373	38.2	6.7	0.559427	0.464751	0	0	0.567144	0	0.330504	0	0	0.168869	0	0.149525	0	0	0.103913	0	0	0	0.032467	0	0	0
CBBNIB_03400	hypothetical protein	0.005	3.101	5	1	2	1	333	37.6	4.61	0	0	0	0	0	0	0	0	0	0	0	0	0	0	0	0	0	0	0.0727339	0	0	0
CBBNIB_03360	hypothetical protein	0.005	3.018	6	1	7	1	181	19	9.32	0.0576426	0	0	0	0.10625	0	0.0681094	0	0	0.0386668	0	0.102713	0	0	0	0	0	0	0.133814	0	0	0
CBBNIB_03350	hypothetical protein	0	18.225	12	3	38	3	293	30.9	4.35	0.0712171	0	0	0	0.0656359	0	0	0	0	0.071659	0	0.190351	0	0	0.595283	0	0	0	0.454649	0	0	0
CBBNIB_03345	hypothetical protein	0	129.41	42	14	114	14	529	55.7	4.39	0.414177	0	0	0	0.363541	0	0.442776	0	0.309191	0.714422	0	0.0702872	0	0	0.0366347	0	0	0	0.0228926	0	0	0
CBBNIB_03335	hypothetical protein	0	6.76	8	2	4	2	236	24.2	4.84	0.0884179	0	0	0	0	0	0	0	0	0.0296555	0	0	0	0	0.0410589	0	0	0	0	0	0	0
CBBNIB_03320	hypothetical protein	0	61.72	41	16	34	16	582	61.5	4.65	0.0537799	0	0	0	0.0330435	0	0.0211818	0	0	0.324682	0	0.0319432	0	0	0.0166493	0	0	0	0	0	0	0
CBBNIB_03315	hypothetical protein	0	6.293	20	2	4	2	132	15	4.51	0.15808	0	0	0	0	0	0	0	0	0.106041	0	0	0	0	0	0	0	0	0	0	0	0
CBBNIB_03300	hypothetical protein	0.019	2.227	10	2	2	2	181	20.7	4.36	0	0	0	0	0	0	0	0	0.225914	0.0386668	0	0	0	0	0	0	0	0	0	0	0	0
CBBNIB_03295	hypothetical protein	0	6.474	30	2	3	2	182	20.5	4.49	0.0573259	0	0	0	0	0	0	0	0	0.0384544	0	0	0	0	0	0	0	0	0.0665395	0	0	0
CBBNIB_03240	hypothetical protein	0	13.019	26	5	14	5	328	34.9	4.4	0.159044	0	0	0	0.117264	0	0	0	0	0.042675	0	0.0566798	0	0	0.0886271	0	0	0	0.0369213	0	0	0
CBBNIB_03235	hypothetical protein	0	27.242	35	5	15	5	278	30.3	4.4	0.0375299	0	0	0	0.0691774	0	0	0	0	0.0251752	0	0	0	0	0	0	0	0	0.522742	0	0	0
CBBNIB_03230	hypothetical protein	0	7.6	12	3	4	3	366	37	5.06	0	0	0	0	0	0	0	0	0	0	0	0	0	0	0.1059	0	0	0	0	0	0	0
CBBNIB_03180	hypothetical protein	0	22.665	20	7	13	7	468	47.7	4.12	0.111467	0	0	0	0.0410926	0	0	0	0.0873729	0.0448634	0	0	0	0	0.0207049	0	0	0	0.051753	0	0	0
CBBNIB_03175	hypothetical protein	0	26.992	17	5	32	5	411	43.7	4.61	0.0761555	0	0	0	0.0935831	0	0.089984	0	0	0.0510854	0	0.090467	0	0	0.400798	0	0	0	0.0589304	0	0	0
CBBNIB_03135	hypothetical protein	0	6.716	11	2	5	2	302	32.9	5.08	0	0	0	0	0	0	0	0	0	0.0231745	0	0	0	0	0.0320857	0	0	0	0.1203	0	0	0
CBBNIB_03115	hypothetical protein	0.003	3.178	9	2	2	2	393	40.2	4.55	0	0	0	0	0	0	0	0	0	0	0	0	0	0	0.0493124	0	0	0	0	0	0	0
CBBNIB_03100	hypothetical protein	0	8.079	21	4	12	4	257	27.5	4.42	0.0811931	0	0	0	0.22449	0	0	0	0	0.0544645	0	0.144677	0	0	0.113112	0	0	0	0	0	0	0
CBBNIB_03095	hypothetical protein	0.023	1.917	7	1	1	1	333	34.2	4.04	0	0	0	0	0	0	0	0	0	0.0210171	0	0	0	0	0	0	0	0	0	0	0	0
CBBNIB_03080	hypothetical protein	0	12.329	12	4	4	4	552	60.7	4.37	0	0	0	0	0	0	0	0	0	0.0507152	0	0	0	0	0	0	0	0	0	0	0	0
CBBNIB_03070	hypothetical protein	0	59.409	45	6	45	6	321	33.2	4.13	0.0325025	0	0	0	0.0599107	0	0	0	0	0.0654083	0	0.173747	0	0	0.784851	0.934612	0	0	0.264085	0	0	0
CBBNIB_03065	hypothetical protein	0	23.773	33	4	26	4	240	24.4	5.55	0.434721	0	0	0	0.240392	0	0.102732	0	0	0.116645	0	0.232387	0	0	0.121124	0	0	0	0.0504592	0	0	0
CBBNIB_03060	hypothetical protein	0	27.555	45	7	29	7	249	26.6	4.73	0.335207	0	0	0	0.154468	0	0.198037	0	0	0.224858	0	0.149325	0	0	0.155661	0	0	0	0.0486353	0	0	0
CBBNIB_03050	hypothetical protein	0	8.204	10	2	6	2	302	32.4	4.37	0	0	0	0	0	0	0	0	0	0.0231745	0	0.184678	0	0	0.0641715	0	0	0	0	0	0	0
CBBNIB_03035	hypothetical protein	0	21.253	11	6	11	6	683	74	4.94	0.0916542	0	0	0	0	0	0	0	0	0.0512349	0	0	0	0	0	0	0	0	0	0	0	0
CBBNIB_03020	hypothetical protein	0	94.29	21	5	177	5	376	38.2	4.2	0.665956	0	0	1.88012	0.869501	0	0.426227	0	0	0.26059	0	2.02721	0	0	0.77313	0.997376	0	0	0.966239	0	0	0
CBBNIB_03015	hypothetical protein	0	101.844	32	5	158	5	358	34.9	3.93	0.0582866	0	0	0.658216	0.107438	0	0.137741	0	0	0.156395	0	0.467371	0	0	2.57134	1.88554	0	0	0.947166	0	0	0
CBBNIB_03000	hypothetical protein	0	25.066	15	5	31	5	450	50.1	5.41	0.255036	0	0	0	0	0	0.10958	0	0	0.0933159	0	0.371819	0	0	0.0215331	0	0	0	0	0	0	0
CBBNIB_02985	hypothetical protein	0	31.377	29	9	21	9	430	45.7	4.84	0	0	0	0	0	0	0	0	0	0.016276	0	0.778226	1.61356	0	0.0225346	0	0	0	0	0	0	0
CBBNIB_02940	hypothetical protein	0	39.127	22	7	40	7	459	46.8	4.44	0.204575	0.377673	0	0	0.0837966	0	0.107432	0	0	0.0914862	0	0.688554	0	0	0	0	0	0	0.0263839	0	0	0
CBBNIB_02935	hypothetical protein	0	20.036	19	5	22	5	421	43.9	5.19	0.123911	0	0	0	0.0913602	0	0.0292822	0	0	0.0498719	0	0.132477	0	0	0.0690491	0	0	0	0.143827	0	0	0
CBBNIB_02930	hypothetical protein	0	22.993	17	5	19	5	387	40.7	4.61	0.215676	0	0	0	0.0496934	0	0	0	0	0.0180845	0	0.0960773	0	0	0.175269	0	0	0	0	0	0	0
CBBNIB_02915	hypothetical protein	0	59.426	22	9	53	9	609	66.5	4.72	0.205582	0	0	0	0.22105	0	0.182184	0	0.201431	0.149397	1.17338	0.122108	0	0.381296	0.0318223	0	0	0	0.0198854	0	0	0
CBBNIB_02910	hypothetical protein	0	38.506	23	7	56	7	297	34.4	5.08	0.456677	0	0	0	0.129504	0	0.0830155	0	0	0.117823	0	0.0625958	0	0	0.750396	0	0	0	0.407751	0	0	0
CBBNIB_02900	hypothetical protein	0.004	3.128	6	1	7	1	141	15.2	5.33	0.14799	0	0	0	0.136392	0	0.0874312	0	0	0.0496361	0	0	0	0	0.137445	0	0	0	0	0	0	0
CBBNIB_02870	hypothetical protein	0	4.198	8	1	8	1	150	15.7	4.91	0.139111	0	0	0	0.128209	0	0.0821854	0	0	0.046658	0	0.12394	0	0	0.0645993	0	0	0	0.0807346	0	0	0
CBBNIB_02850	hypothetical protein	0.006	2.95	9	1	1	1	235	26.4	5.53	0	0	0	0	0	0	0	0	0	0.0297817	0	0	0	0	0	0	0	0	0	0	0	0
CBBNIB_02845	hypothetical protein	0	19.774	10	4	6	4	460	48.9	4.61	0	0	0	0	0	0	0	0	0	0.0912873	0	0	0	0	0	0	0	0	0	0	0	0
CBBNIB_02840	hypothetical protein	0	8.385	10	3	4	3	405	42.7	4.51	0	0	0	0	0	0	0	0	0	0.0172807	0	0.137711	0	0	0	0	0	0	0	0	0	0
CBBNIB_02835	hypothetical protein	0	14.794	31	4	10	4	271	27.9	4.17	0	0	0	0	0	0	0	0	0	0	0	0	0	0	0.0715121	0	0	0	0.357497	0	0	0
CBBNIB_02810	hypothetical protein	0	8.267	16	3	17	3	311	35.3	4.81	0.0335476	0	0	2.27307	0	0	0	0.624786	0	0.0900153	0	0	0	0	0.186943	0	0	0	0	0	0	0
CBBNIB_02775	hypothetical protein	0	5.237	6	2	2	2	440	47.7	4.32	0	0	0	0	0	0	0	0	0	0.0318122	0	0	0	0	0	0	0	0	0	0	0	0
CBBNIB_02700	hypothetical protein	0	6.266	4	1	2	1	367	39	4.74	0.0284286	0	0	0	0	0	0	0	0	0	0	0.0506566	0	0	0	0	0	0	0	0	0	0
CBBNIB_02670	hypothetical protein	0	48.121	26	11	60	11	802	84.8	4.2	0.0910638	0	0	0	0.623459	0	0.138342	0.0807599	0	0.0785389	0	0.115904	0	0	0.0120822	0	0	0	0.0302	0	0	0
CBBNIB_02665	hypothetical protein	0	44.325	28	7	42	7	380	39.4	4.45	0.0274561	0	0	0	0	0	0	0	0	0.0736705	0	1.51663	0	0	0.127499	0	0	0	0.0318689	0	0	0
CBBNIB_02650	Bicarbonate transport ATP-binding protein CmpC	0.023	1.924	10	2	3	2	273	29.2	4.68	0	0	0	0	0	0	0	0	0	0.0256362	0	0	0	0	0.0709882	0	0	0	0	0	0	0
CBBNIB_02645	hypothetical protein	0	6.692	10	2	9	2	266	27.9	7.21	0.117669	0	0	0	0.0722982	0	0.0463451	0	0	0.0263109	0	0.0698908	0	0	0.0364282	0	0	0	0.0455271	0	0	0
CBBNIB_02640	hypothetical protein	0	84.452	38	6	72	6	298	32	3.99	0.0350111	0	0	0	0	0	0	0	0	0.0469711	0	1.37249	0	0	1.30066	0.251687	0	0	0.243829	0	0	0
CBBNIB_02620	hypothetical protein	0	22.287	16	5	22	5	546	60	4.56	0.248412	0	2.93408	0	0	0	0.0451568	0	0	0	0	0	0	0	0.0354941	0	0	0	0.0887194	0	0	0
CBBNIB_02600	hypothetical protein	0.001	3.869	8	1	1	1	423	46.1	4.22	0	0	0	0	0	0	0	0	0	0.0165454	0	0	0	0	0	0	0	0	0	0	0	0
CBBNIB_02590	hypothetical protein	0	9.181	10	3	11	3	301	33.5	4.46	0.138649	0	0	0	0	0	0	0	0	0	0	0	0	0	0.0321923	0	0	0	0.241399	0	0	0
CBBNIB_02585	Adenylate kinase	0	4.77	5	1	13	1	223	24.4	4.23	0.0935723	0	0	0	0.0862391	0	0.110563	0	0	0.0313843	0	0.166735	0	0	0.0869049	0	0	0	0.162917	0	0	0
CBBNIB_02565	hypothetical protein	0	6.044	6	2	2	2	514	56.3	4.37	0	0	0	0	0	0	0	0	0	0.0272323	0	0	0	0	0	0	0	0	0	0	0	0
CBBNIB_02540	hypothetical protein	0	4.166	10	1	4	1	136	14.2	9.52	0.153431	0	0	0	0	0	0	0	0	0	0	0.136698	0	0	0	0	0	0	0.0890456	0	0	0
CBBNIB_02535	Serine hydroxymethyltransferase	0	7.508	4	1	3	1	415	44.6	4.41	0.0251405	0	0	0	0	0	0	0	0	0.0168643	0	0	0	0	0.0233491	0	0	0	0	0	0	0
CBBNIB_02525	hypothetical protein	0	7.467	2	1	2	1	563	59.1	4.45	0.0185316	0	0	0	0	0	0	0	0	0.0124311	0	0	0	0	0	0	0	0	0	0	0	0
CBBNIB_02495	hypothetical protein	0.046	1.483	3	1	2	1	421	47.3	4.68	0	0	0	0	0	0	0	0	0	0	0	0.0883181	0	0	0	0	0	0	0	0	0	0
CBBNIB_02490	hypothetical protein	0	6.52	8	2	8	2	296	31.9	4.4	0.0704953	0	0	0	0.0649707	0	0	0	0	0.0236442	0	0	0	0	0.0327361	0	0	0	0.122738	0	0	0
CBBNIB_02485	hypothetical protein	0	27.712	18	4	14	4	401	44.4	4.22	0	0	0	0	0	0	0	0	0	0	0	0.463615	0	1.73723	0	0	0	0	0.0302	0	0	0
CBBNIB_02475	hypothetical protein	0	5.754	11	2	3	2	357	40.4	4.3	0	0	0	0	0	0	0	0	0	0.0392084	0	0.0520755	0	0	0	0	0	0	0	0	0	0
CBBNIB_02470	hypothetical protein	0	6.291	9	2	14	2	338	36.3	4.13	0.0926033	0	0	0	0.113795	0	0.0729456	0	0	0.0621186	0	0.220011	0	0	0	0	0	0	0	0	0	0
CBBNIB_02460	hypothetical protein	0	14.067	9	5	18	5	401	42.4	5.15	0.104073	0	0	0	0.0959168	0	0	0	0	0.0174531	0	0.0463615	0	0	0.217479	0	0	0	0.0302	0	0	0
CBBNIB_02455	hypothetical protein	0.001	3.697	17	2	2	2	303	32.5	4.72	0	0	0	0	0	0	0	0	0	0	0	0	0	0	0	0	0	0	0.0799353	0	0	0
CBBNIB_02450	hypothetical protein	0.03	1.717	6	1	1	1	210	23	4.51	0.0496824	0	0	0	0	0	0	0	0	0	0	0	0	0	0	0	0	0	0	0	0	0
CBBNIB_02425	hypothetical protein	0	13.005	15	5	7	5	552	59.4	4.69	0	0	0	0	0	0	0	0	0	0.063394	0	0.0336793	0	0	0.0175542	0	0	0	0	0	0	0
CBBNIB_02415	hypothetical protein	0	4.835	8	2	2	2	353	35.3	4.73	0	0	0	0	0	0	0	0	0	0	0	0	0	0	0.0549002	0	0	0	0	0	0	0
CBBNIB_02410	hypothetical protein	0	88.99	43	12	54	12	397	40.3	4.25	0	0	0	0	0	0	0	0	0	0.881447	0	0.0468286	0	0	0.0732234	0	0	0	0	0	0	0
CBBNIB_02400	hypothetical protein	0	13.213	21	3	6	3	323	34.2	4.6	0	0	0	0	0	0	0	0	0	0	0	0.0575572	0	0	0.149998	0	0	0	0	0	0	0
CBBNIB_02375	hypothetical protein	0.011	2.566	4	1	1	1	272	31.5	4.72	0	0	0	0	0	0	0	0	0	0	0	0	0	0	0.0356246	0	0	0	0	0	0	0
CBBNIB_02370	hypothetical protein	0	43.447	9	5	17	5	780	81.4	4.02	0.0802562	0	0	0	0.197244	0	0.0158049	0	0	0.00897268	0	0.0238346	0	0	0	0	0	0	0	0	0	0
CBBNIB_02365	hypothetical protein	0.007	2.893	5	1	5	1	373	38.6	4.49	0.0279713	0	0	0	0	0	0	0	0	0.0187633	0	0.0498417	0	0	0.0259783	0	0	0	0.032467	0	0	0
CBBNIB_02355	hypothetical protein	0	8.005	17	3	5	3	231	25.6	4.82	0.0451658	0	0	0	0	0	0.106734	0	0	0.0302974	0	0	0	0	0	0	0	0	0.0524251	0	0	0
CBBNIB_02345	hypothetical protein	0.001	3.441	17	2	2	2	202	22.3	4.93	0.05165	0	0	0	0.0952046	0	0	0	0	0	0	0	0	0	0	0	0	0	0	0	0	0
CBBNIB_02305	hypothetical protein	0	7.141	4	2	6	2	596	64.8	6.76	0.0525167	0	0	0	0.0322673	0	0	0	0.137217	0	0	0	0	0	0	0	0	0	0	0	0	0
CBBNIB_02300	hypothetical protein	0.012	2.419	9	1	3	1	171	18.2	4.22	0	0	0	0	0	0	0	0	0	0	0	0	0	0	0.113332	0	0	0	0.0708199	0	0	0
CBBNIB_02270	hypothetical protein	0	9.609	15	5	8	5	376	40.2	4.83	0.166489	0	0	0	0	0	0	0	0	0	0	0	0	0	0.051542	0	0	0	0	0	0	0
CBBNIB_02240	hypothetical protein	0	65.785	38	11	71	11	464	49.5	4.03	0.157399	0	0	0	0.0828937	0	0.106274	0.139589	0	0.814503	0	0	0	0	0.0417668	0	0	0	0.0260996	0	0	0
CBBNIB_02235	hypothetical protein	0	14.106	15	5	47	5	486	48.7	5.54	0.386419	0	0	0	0.276994	0	0.152195	0	0	0.100804	0	0	0	0	0.0996902	0	0	0	0.0996724	0	0	0
CBBNIB_02200	hypothetical protein	0	35.483	27	8	75	8	334	35.8	4.72	0.843411	0	0	0	0.460631	0	0.295277	0	0.122427	0.209542	0	0.222646	0	0	0.290116	0	0	0	0.217548	1.89058	0	0
CBBNIB_02170	hypothetical protein	0	28.84	26	6	12	6	446	46.9	4.41	0	0	0	0	0	0	0	0	0	0.188306	0	0	0	0	0	0	0	0	0	0	0	0
CBBNIB_02095	hypothetical protein	0	34.965	26	7	41	7	336	35.1	4.44	0.0310515	0	0	0	0	0	0.0366899	0	0.121698	0.37493	0	0.331981	0	0	0.374906	0	0	0	0.0360423	0	0	0
CBBNIB_02080	hypothetical protein	0	29.677	50	6	60	6	281	30.1	4.36	0.148517	0	0	0	0.205317	0	0.307098	0	0	0.149438	0	1.58784	0	0	0.37932	0.266913	0	0	0.172387	0	0	0
CBBNIB_02075	hypothetical protein	0	30.458	20	10	14	10	900	102.5	4.49	0.0579628	0	0	0	0.192313	0	0	0	0	0	0	0	0	0	0	0	0	0	0	0	0	0
CBBNIB_02060	hypothetical protein	0	9.363	8	3	4	3	447	50.4	4.53	0	0	0	0	0	0	0	0	0	0.0626281	0	0	0	0	0	0	0	0	0	0	0	0
CBBNIB_02055	hypothetical protein	0	87.602	33	15	125	15	693	74.1	4.27	0.316161	0	0	0	1.6928	2.79691	0.409148	0.0934624	0.0590051	0.0908921	0	0	0	0	0.0838952	0	0	0	0.0349501	0	0	0
CBBNIB_02045	hypothetical protein	0	7.123	14	3	9	3	260	27.5	4.42	0.0401281	0	0	0	0	0	0	0	0	0.0269181	0	0	0	0	0.0745376	0	0	0	0.232888	0	0	0
CBBNIB_02005	hypothetical protein	0.007	2.934	18	1	3	1	137	15.6	4.68	0	0	0	0	0	0	0	0	0	0.0510854	0	0.271401	0	0	0	0	0	0	0	0	0	0
CBBNIB_02000	hypothetical protein	0	24.864	16	6	36	6	420	45.7	4.46	0.173888	0	0	0	0.137367	0	0.0880558	0	0	0.116645	0	0.708227	0	0	0	0	0	0	0	0	0	0
CBBNIB_01990	hypothetical protein	0	13.991	8	4	15	3	525	54.8	7.87	0.0397459	0	0	0	0.0366311	0	0.0234815	0	0	0.0933159	0	0.0708227	0	0	0.0369139	0	0	0	0	0	0	0
CBBNIB_01960	hypothetical protein	0.001	3.653	4	1	1	1	345	36.3	4.55	0	0	0	0	0	0	0	0	0	0	0	0	0	0	0.0280866	0	0	0	0	0	0	0
CBBNIB_01920	hypothetical protein	0	4.292	7	2	2	2	414	43.9	4.4	0	0	0	0	0	0	0	0	0	0.0338101	0	0	0	0	0	0	0	0	0	0	0	0
CBBNIB_01895	hypothetical protein	0	5.049	7	2	9	2	195	19.7	5.1	0.0535041	0	0	0	0.0986222	0	0.0632195	0	0	0.0358907	0	0.190677	0	1.19082	0.0993835	0	0	0	0	0	0	0
CBBNIB_01880	DUF5808 domain-containing protein	0	9.148	31	2	19	2	97	10.5	4.3	0.32268	0	0	0	0.594783	0	0.254182	0	0	0.288606	0	0.383319	0	0	0.0998958	0	0	0	0.49939	0	0	0
CBBNIB_01850	hypothetical protein	0.029	1.744	4	1	2	1	239	24.4	4.2	0	0	0	0	0	0	0	0	0	0	0	0	0	0	0.0405435	0	0	0	0.0506703	0	0	0
CBBNIB_01835	hypothetical protein	0	16.26	6	1	8	1	382	40.8	6.38	0.0546247	0	0	0	0.100688	0	0.0322717	0	0.107043	0	0	0.0486674	0	0	0	0	0	0	0.0317021	0	0	0
CBBNIB_01825	hypothetical protein	0	10.4	7	4	9	4	557	62.8	4.67	0.0561938	0	0	0	0.0345266	0	0.0221325	0	0	0.0376949	0	0.033377	0	0	0	0	0	0	0	0	0	0
CBBNIB_01800	hypothetical protein	0	10.284	11	5	11	5	755	82.5	4.63	0.0414569	0	0	0	0.0764159	0	0.0816411	0	0	0	0	0	0	0	0	0	0	0	0	0	0	0
CBBNIB_01775	hypothetical protein	0.034	1.636	3	1	1	1	570	63.4	4.65	0	0	0	0	0	0	0	0	0	0.0122784	0	0	0	0	0	0	0	0	0	0	0	0
CBBNIB_01745	Glyceraldehyde-3-phosphate dehydrogenase 1	0.039	1.543	4	1	1	1	350	37.3	4.4	0	0	0	0	0	0	0	0	0	0	0	0.053117	0	0	0	0	0	0	0	0	0	0
CBBNIB_01740	hypothetical protein	0	7.919	6	2	2	2	407	43.7	4.39	0	0	0	0	0	0	0	0	0	0.0171958	0	0.045678	0	0	0	0	0	0	0	0	0	0
CBBNIB_01735	hypothetical protein	0	4.04	21	2	5	2	153	16.9	4.32	0.204575	0	0	0	0	0	0	0	0	0.0457431	0	0	0	0	0.0633326	0	0	0	0	0	0	0
CBBNIB_01730	hypothetical protein	0	40.87	33	9	57	9	457	50.1	4.39	0.25113	0	0	0	0.210408	0	0.053951	0	0	0.260345	0	0.488165	0	3.55682	0.0424065	0	0	0	0.0264993	0	0	0
CBBNIB_01715	hypothetical protein	0.021	1.965	6	1	1	1	376	40.4	5.1	0	0	0	0	0	0	0	0	0	0	0	0	0	0	0.025771	0	0	0	0	0	0	0
CBBNIB_01705	hypothetical protein	0.004	3.128	7	1	7	1	257	26.4	9.31	0.12179	0	0	0	0	0	0.0959362	0	0	0	0	0	0	0	0.0754077	0	0	0	0	0	0	0
CBBNIB_01700	hypothetical protein	0	34.556	20	5	21	5	494	53.3	5.52	0.253441	0	0	0	0.0778596	0	0.0249551	0	0	0.0141674	0	0.150534	0	0	0.0196152	0	0	0	0	0	0	0
CBBNIB_01685	hypothetical protein	0	4.179	10	2	6	2	215	23.2	5.22	0.097054	0	0	0	0	0	0.0573386	0	0	0.0325521	0	0	0	0	0.0901385	0	0	0	0	0	0	0
CBBNIB_01670	hypothetical protein	0	9.084	21	3	6	3	236	26.2	4.72	0	0	0	0	0	0	0	0	0	0	0	0	0	0	0.0821177	0	0	0	0.205258	0	0	0
CBBNIB_01645	hypothetical protein	0	5.479	29	3	3	3	239	25.8	4.34	0.087308	0	0	0	0	0	0	0	0	0	0	0	0	0	0	0	0	0	0.0506703	0	0	0
CBBNIB_01635	hypothetical protein	0.023	1.923	7	1	1	1	132	14.2	9.58	0.0790402	0	0	0	0	0	0	0	0	0	0	0	0	0	0	0	0	0	0	0	0	0
CBBNIB_01615	hypothetical protein	0	5.537	4	1	4	1	304	33	4.08	0	0	0	0	0	0	0	0	0	0	0	0	0	0	0.127499	0	0	0	0	0	0	0
CBBNIB_01600	hypothetical protein	0.001	3.303	4	1	4	1	240	25.6	10.17	0.0434721	0	0	0	0	0	0.0513659	0	0	0.0291612	0	0	0	0	0.0403745	0	0	0	0	0	0	0
CBBNIB_01590	hypothetical protein	0	45.968	56	8	29	8	248	26.4	5.25	0.0420698	0	0	0	0	0	0	0	0	0	0	0	0	0	0.234433	0	0	0	1.07429	0	0	0
CBBNIB_01585	hypothetical protein	0	40.307	45	9	20	9	338	37.3	5.36	0.0308678	0	0	0	0	0	0.0364728	0	0	0.124237	0	0.495026	0	0	0.0573366	0	0	0	0.035829	0	0	0
CBBNIB_01575	hypothetical protein	0	45.49	47	12	30	12	421	44.2	4.49	0	0	0	0	0	0	0	0	0	0.0831199	0	0.750704	0	3.86096	0.0230164	0	0	0	0	0	0	0
CBBNIB_01565	hypothetical protein	0.011	2.685	4	1	3	1	278	31.1	4.56	0.0375299	0	0	0	0	0	0	0	0	0	0	0	0	0	0.0348557	0	0	0	0.0435619	0	0	0
CBBNIB_01560	hypothetical protein	0.005	3.026	5	2	3	2	370	39.9	4.55	0	0	0	0	0.0519766	0	0	0	0	0	0	0.100492	0	0	0	0	0	0	0	0	0	0
CBBNIB_01545	hypothetical protein	0.001	3.704	6	2	2	2	603	65.4	4.59	0	0	0	0	0.0318927	0	0	0	0	0.0116065	0	0	0	0	0	0	0	0	0	0	0	0
CBBNIB_01540	hypothetical protein	0	66.875	61	10	40	10	305	31.5	4.22	0.273661	0	0	0	0.0630535	0	0.040419	0	0	0.0688396	0	0.487632	0	0	0.540092	0	0	0	0.0794111	0	0	0
CBBNIB_01535	hypothetical protein	0	4.221	17	2	2	2	267	28.4	4.44	0	0	0	0	0	0	0	0	0	0	0	0	0	0	0	0	0	0	0.0907131	0	0	0
CBBNIB_01530	3-hydroxybutyryl-CoA dehydrogenase	0	8.789	14	3	4	3	287	30.9	4.44	0	0	0	0	0	0	0	0	0	0	0	0	0	0	0.0675254	0	0	0	0.0843916	0	0	0
CBBNIB_01525	hypothetical protein	0	4.961	4	1	46	1	226	22.1	4.61	0.553981	0	0	0	0.850944	0	0.272739	0	0.361863	0.154838	0	0.411304	0	0	0.128627	0	0	0	0.21434	0	0	0
CBBNIB_01515	MFS domain-containing protein	0	21.323	16	4	19	4	438	44.8	4.55	0.142922	0	0	0	0.131721	0	0.0281457	0	0	0.0319575	0	0.0848902	0	0	0.022123	0	0	0	0.110595	0	0	0
CBBNIB_01510	hypothetical protein	0	20.917	17	5	8	5	594	65.3	4.42	0.070258	0	0	0	0	0	0.0830155	0	0	0	0	0	0	0	0	0	0	0	0	0	0	0
CBBNIB_01500	hypothetical protein	0.001	3.667	14	2	17	2	160	16.5	8.97	0.456457	1.08345	0	0	0.360587	0	0.231146	0	0	0.0437418	0	0	0	0	0.0605618	0	0	0	0.0756887	0	0	0
CBBNIB_01495	hypothetical protein	0.021	2.05	6	1	1	1	204	22.1	4.2	0	0	0	0	0	0	0	0	0	0	0	0	0	0	0	0	0	0	0.0593637	0	0	0
CBBNIB_01490	hypothetical protein	0	5.002	3	1	10	1	291	29.7	4.45	0.0717066	0	0	0	0.198261	0	0.0423636	0	0	0.048101	0	0	0	0	0.0665972	0	0	0	0	0	0	0
CBBNIB_01470	Acyl-CoA dehydrogenase	0.005	3.086	8	2	3	2	390	41.8	4.53	0	0	0	0	0	0	0	0	0	0.0179454	0	0.0953383	0	0	0	0	0	0	0	0	0	0
CBBNIB_01460	hypothetical protein	0	42.147	29	7	8	7	425	43.5	4.27	0	0	0	0	0	0	0	0	0	0.13174	0	0	0	0	0	0	0	0	0	0	0	0
CBBNIB_01410	hypothetical protein	0	11.022	26	5	14	5	403	43.7	4.21	0	0	0	0	0	0	0	0	0.507327	0	0	0	0	5.18581	0	0	0	0	0	0	0	0
CBBNIB_01405	hypothetical protein	0.001	3.265	3	1	2	1	425	45	4.45	0	0	0	0	0	0	0	0	0	0.0164675	0	0.0437434	0	0	0	0	0	0	0	0	0	0
CBBNIB_01395	hypothetical protein	0	6.485	12	3	10	3	321	36.7	4.93	0.0975076	0	0	0	0	0	0	0	0	0.0218028	0	0.173747	0	0	0.0905597	0	0	0	0	0	0	0
CBBNIB_01380	hypothetical protein	0	83.012	32	10	92	10	577	60.6	4.15	0.054246	0	0	0	1.2332	0	0.427307	0.449008	0.921277	0.121295	0	0.03222	0	0	0.0167936	0.129987	0	0	0	1.09437	0	0
CBBNIB_01375	nicotinate phosphoribosyltransferase	0.001	3.536	10	2	3	2	386	40.4	4.59	0	0	0	0	0	0	0	0	0	0	0	0.144489	0	0	0	0	0	0	0	0	0	0
CBBNIB_01340	hypothetical protein	0	5	7	1	6	1	274	30.4	5.96	0.0761555	0	0	0	0	0	0.044992	0	0	0.0255427	0	0.0678502	0	0	0	0	0	0	0.0441978	0	0	0
CBBNIB_01330	hypothetical protein	0.006	2.984	2	1	1	1	578	63.6	5.15	0.0180507	0	0	0	0	0	0	0	0	0	0	0	0	0	0	0	0	0	0	0	0	0
CBBNIB_01325	hypothetical protein	0	4.216	11	3	4	3	557	62.7	4.63	0	0	0	0	0	0	0	0	0	0.0502599	0	0	0	0	0	0	0	0	0	0	0	0
CBBNIB_01320	hypothetical protein	0.036	1.573	9	1	1	1	249	27.5	4.7	0	0	0	0	0	0	0	0	0	0.0281072	0	0	0	0	0	0	0	0	0	0	0	0
CBBNIB_01315	hypothetical protein	0	44.055	35	4	90	4	164	17.2	4.27	0.636177	0	0	0	1.6417	0	0.225509	0	0.249332	0.384075	0	1.92711	0	0	0.945355	0	0	0	1.18148	15.4013	0	0
CBBNIB_01310	hypothetical protein	0	5.848	6	1	82	1	157	15.9	3.98	0.664542	0	0	0	1.5924	0	0	0	0	0.846976	0	1.77621	4.41931	1.47904	0.740629	0	0	0	0.848485	0	0	0
CBBNIB_01305	hypothetical protein	0.001	3.26	2	1	4	1	630	66.3	3.98	0.0331216	0	0	0	0	0	0.0195679	0	0	0.011109	0	0	0	0	0	0	0	0	0	0	0	0
CBBNIB_01270	hypothetical protein	0	12.295	35	4	20	4	227	23.4	3.74	0	0	0	0	0	0	0	0.285328	0	0.0308312	0	0.245696	0	0	0.170747	2.97367	1.04316	0	0	0	0	0
CBBNIB_01265	hypothetical protein	0.021	2.139	7	1	1	1	190	19.9	4.04	0	0	0	0	0	0	0	0	0	0	0	0	0	0	0	0	0	0	0	3.32344	0	0
CBBNIB_01260	hypothetical protein	0	123.232	49	5	829	5	230	23.7	3.81	0.362898	5.27593	0	5.12264	0.668916	0	0.64319	1.12643	0.35557	2.86034	12.4277	2.02076	30.1666	12.1153	10.7431	60.6543	78.2462	0	2.05347	13.7272	0	0
CBBNIB_01255	hypothetical protein	0	40.824	16	5	181	5	196	20.6	3.89	0	0	0	0	0	0	0.062897	0	0	0.249953	0	0.758815	7.07992	2.36948	3.01573	24.108	17.5182	0	0.432507	3.2217	0	0
CBBNIB_01230	hypothetical protein	0.033	1.67	6	1	1	1	187	20.5	4.23	0.0557931	0	0	0	0	0	0	0	0	0	0	0	0	0	0	0	0	0	0	0	0	0
CBBNIB_01225	hypothetical protein	0	6.282	10	3	3	3	504	52.7	4.55	0.020701	0	0	0	0	0	0.0244599	0	0	0.0138863	0	0	0	0	0	0	0	0	0	0	0	0
CBBNIB_01205	O-acetylhomoserine/O-acetylserine sulfhydrylase	0.047	1.459	6	1	1	1	444	47.3	4.37	0	0	0	0	0	0	0	0	0	0	0	0.0418715	0	0	0	0	0	0	0	0	0	0
CBBNIB_01200	hypothetical protein	0	39.689	30	10	18	10	432	46.5	4.61	0	0	0	0	0	0	0.0285366	0	0	0.275412	0	0	0	0	0	0	0	0	0	0	0	0
CBBNIB_01175	hypothetical protein	0	6.108	5	1	2	1	362	39.4	5.91	0	0	0	0	0	0	0	0	0	0	0	0	0	0	0.0535353	0	0	0	0	0	0	0
CBBNIB_01160	hypothetical protein	0.007	2.935	5	1	36	1	161	17.5	4.96	0.259213	1.07672	0	1.46361	0.238898	0	0.15314	1.20688	0.507957	0.13041	4.43845	0.230944	0	0	0.120371	0.93171	0.735397	100	0.150437	3.92207	46.3784	49.7268
CBBNIB_01155	hypothetical protein	0.001	3.63	11	1	1	1	156	17.4	4.4	0.0668802	0	0	0	0	0	0	0	0	0	0	0	0	0	0	0	0	0	0	0	0	0
CBBNIB_01140	Biotin carboxylase	0	21.622	26	9	22	9	631	67.5	4.3	0.0496037	0	0	0	0.12191	0	0.195369	0	0	0.0554572	0	0	0	0	0	0	0	0	0	0	0	0
CBBNIB_01125	Methylmalonyl-CoA carboxyltransferase 12S subunit	0	17.024	17	6	13	6	514	56.3	4.86	0.0608948	0	0	0	0	0	0	0	0	0.136161	0	0	0	0	0	0	0	0	0	0	0	0
CBBNIB_01115	hypothetical protein	0	61.871	63	9	35	9	348	36.5	4.01	0.179885	0	0	0	0.22105	0	0.0708495	0.186119	0	0.140778	0	0.427378	0	0	0.139223	0	0	0	0.0695988	0	0	0
CBBNIB_01090	hypothetical protein	0	7.646	24	3	9	3	216	23.7	4.65	0.0483024	0	0	0	0	0	0.0570732	0	0	0.0324014	0	0	0	0	0.0897212	0	0	0	0.224263	0	0	0
CBBNIB_01070	hypothetical protein	0	70.083	16	3	126	3	428	45.8	4.09	0.121884	0	0	0	0.089866	0	0.0864099	0	0	0.441506	0	2.21528	17.8321	6.51054	0.226399	0	0	0	0.141474	0	0	0
CBBNIB_01065	hypothetical protein	0.011	2.633	2	1	8	1	328	36.2	4.78	0.0954266	0	0	0	0.0586321	0	0.112754	0	0	0	0	0.0566798	0	0	0	0	0	0	0	0	0	0
CBBNIB_01060	hypothetical protein	0	8.031	10	2	9	2	314	33.7	4.88	0.0664542	0	0	0	0.122493	0	0.0392605	0	0	0.0222888	0	0.0592069	0	0	0.0308595	0	0	0	0.0385675	0	0	0
CBBNIB_01055	ABC transporter domain-containing protein	0	52.683	30	7	38	7	372	40.5	4.32	0.364605	0	0	0	0.0516971	0	0.0662785	0	0	0.131696	0	0.69966	0	0	0.0260481	0	0	0	0	0	0	0
CBBNIB_01045	hypothetical protein	0.001	3.321	4	1	2	1	159	16.8	4.65	0	0	0	0	0	0	0	0	0	0.0440169	0	0	0	0	0.0609427	0	0	0	0	0	0	0
CBBNIB_01035	hypothetical protein	0	23.335	17	3	26	3	271	28.2	8.79	0.230996	0	0	0	0.212893	0	0.13647	0	0	0.103302	0	0.205804	0	0	0.107268	0	0	0	0.134061	2.33009	0	0
CBBNIB_01030	hypothetical protein	0	84.399	66	16	117	16	333	34.7	4.31	0.657956	0	0	0	0.34651	0	0.296164	0	0	0.189154	0	1.45155	0	0	1.01846	0	0	0	0.436403	0	0	0
CBBNIB_01025	DNA ligase	0.017	2.274	4	2	6	2	734	79.1	4.41	0	0	0	0	0	0	0.0503861	0	0.111418	0	0	0.0253283	0	0	0	0	0	0	0	0	0	0
CBBNIB_01020	Adenine deaminase 2	0	12.128	13	3	6	3	384	39.6	4.37	0	0	0	0	0	0	0	0	0	0.0364515	0	0.193656	0	0	0	0	0	0	0	0	0	0
CBBNIB_01015	hypothetical protein	0	270.852	62	29	668	29	552	59	4.75	1.53097	1.57022	0	0.853773	1.18454	0	1.42931	0.58668	0.296308	5.31241	3.88364	0.673586	0	0.841338	0.386191	0	0	0	0.153571	0	0	0
CBBNIB_01000	GMP synthase (glutamine-hydrolyzing)	0	15.591	30	6	11	6	305	33.9	4.51	0	0	0	0	0	0	0	0	0	0	0	0	0	0	0.349471	0	0	0	0	0	0	0
CBBNIB_00965	hypothetical protein	0	31.701	16	5	28	5	399	42.5	4.81	0.339932	0	0	0	0.0963976	0	0.0617935	0	0	0.0175406	0	0.186376	0	0	0.0971418	0	0	0	0.0607027	0	0	0
CBBNIB_00955	hypothetical protein	0	4.744	3	1	6	1	390	41.3	9.45	0.0535041	0	0	0	0.0493111	0	0.0316098	0	0	0.0179454	0	0.0476691	0	0	0	0	0	0	0	0	0	0
CBBNIB_00950	hypothetical protein	0	15.494	25	5	6	5	400	44.9	6.64	0.0521665	0	0	0.589103	0	0	0	0	0	0	0	0.139432	0	0	0	0	0	0	0	0	0	0
CBBNIB_00930	hypothetical protein	0	18.897	34	3	15	3	120	12.7	5.49	0.260833	0	0	0	0	0	0.102732	0	0	0.23329	0	0	0	0	0.322996	0	0	0	0.302755	0	0	0
CBBNIB_00895	hypothetical protein	0	8.899	19	2	3	2	220	23.2	4.74	0.0474241	0	0	0	0.0874151	0	0	0	0	0	0	0	0	0	0.044045	0	0	0	0	0	0	0
CBBNIB_00885	hypothetical protein	0	4.036	2	1	5	1	509	55.3	4.31	0.0204977	0	0	0	0	0	0.0484393	0	0	0.0137499	0	0	0	0	0.0190371	0	0	0	0	0	0	0
CBBNIB_00880	hypothetical protein	0	7.232	8	2	2	2	586	64.5	4.41	0	0	0	0	0	0	0.0420744	0	0	0	0	0	0	0	0	0	0	0	0	0	0	0
CBBNIB_00870	hypothetical protein	0	30.824	43	9	19	9	327	35.3	4.61	0	0	0	0	0	0	0	0	0	0	0	0	0	0	0.563021	0	0	0	0	0	0	0
CBBNIB_00865	hypothetical protein	0	8.398	11	2	3	2	319	34.4	4.45	0	0	0	0	0	0	0	0	0	0	0	0	0	0	0.0607517	0	0	0	0.037963	0	0	0
CBBNIB_00855	hypothetical protein	0	41.136	55	3	50	3	136	13.8	3.83	0.537009	0	0	0	0.565627	0	0.181291	0	0	0.463149	0	0.956888	0	0	0.783741	0	0	0	0.890456	0	0	0
CBBNIB_00850	hypothetical protein	0	32.519	40	4	105	4	126	13.1	4.26	1.32486	0	0	3.74034	0.915777	0	1.07624	0.514043	0.324528	0.999813	0	0.737737	5.5066	1.84293	0.845943	0.595259	0	0	2.49893	20.0461	0	0
CBBNIB_00830	hypothetical protein	0.021	2.083	10	2	2	2	600	63.1	4.4	0.0173888	0	0	0	0	0	0	0	0.0681509	0	0	0	0	0	0	0	0	0	0	0	0	0
CBBNIB_00810	Oligoendopeptidase F	0	12.272	10	3	3	3	599	67.7	4.32	0	0	0	0	0	0	0.0617419	0	0	0	0	0	0	0	0	0	0	0	0	0	0	0
CBBNIB_00795	O-acetylhomoserine/O-acetylserine sulfhydrylase	0	82.699	47	9	53	9	434	46.6	4.39	0.192319	0	0	0	0.177247	0	0.11362	0	0	0.177386	0	0.771054	0	1.07009	0.0446539	0	0	0	0.111615	0	0	0
CBBNIB_00790	hypothetical protein	0	165.266	47	17	268	8	409	44.9	4.42	0.765279	1.27153	0	0	0.611265	0	0.421979	0	0	0.359346	0	2.4091	0	1.70325	1.44519	0	0	0	2.07265	0	0	0
CBBNIB_00785	hypothetical protein	0.001	3.385	19	1	1	1	197	18.7	5.24	0	0	0	0	0	0	0	0	0	0	0	0	0	0	0.0491873	0	0	0	0	0	0	0
CBBNIB_00780	hypothetical protein	0	4.735	11	2	9	2	176	18.7	6.81	0.17784	0	0	0	0.109269	0	0.0700444	0	0	0.0795306	0	0	0	0	0.110112	0	0	0	0	0	0	0
CBBNIB_00755	hypothetical protein	0	5.349	7	2	3	2	296	31.4	4.36	0	0	0	0	0	0	0	0	0	0	0	0.0628073	0	0	0.0654722	0	0	0	0	0	0	0
CBBNIB_00730	hypothetical protein	0.005	3.017	7	2	2	2	367	41.1	4.83	0	0	0	0	0	0	0	0	0	0	0	0	0	0	0.0528059	0	0	0	0	0	0	0
CBBNIB_00720	hypothetical protein	0	5.614	13	1	1	1	186	19.8	4.12	0.0560931	0	0	0	0	0	0	0	0	0	0	0	0	0	0	0	0	0	0	0	0	0
CBBNIB_00680	hypothetical protein	0	10.651	11	4	5	4	509	52.2	4.42	0	0	0	0	0	0	0	0	0	0.0687494	0	0	0	0	0	0	0	0	0	0	0	0
CBBNIB_00660	hypothetical protein	0.001	3.678	12	2	2	2	309	31	4.42	0	0	0	0	0	0	0	0	0	0	0	0	0	0	0.0627177	0	0	0	0	0	0	0
CBBNIB_00645	Ornithine carbamoyltransferase	0	7.538	9	2	4	2	299	32	4.28	0	0	0	0	0	0	0.0412301	0	0	0	0	0	0	0	0.097223	0	0	0	0	0	0	0
CBBNIB_00635	hypothetical protein	0	3.925	3	1	5	1	382	40.5	4.13	0.0546247	0	0	0	0.0503438	0	0.0322717	0	0	0	0	0	0	0	0	0	0	0	0.0317021	0	0	0
CBBNIB_00605	hypothetical protein	0.023	1.884	7	1	2	1	304	32.4	4.5	0.0343201	0	0	0	0.0632609	0	0	0	0	0	0	0	0	0	0	0	0	0	0	0	0	0
CBBNIB_00585	hypothetical protein	0	4.149	8	2	7	2	390	39.8	5.8	0.107008	0	0	0	0.0493111	0	0	0	0	0.0358907	0	0	0	0	0	0	0	0	0	0	0	0
CBBNIB_00540	hypothetical protein	0	19.476	31	6	24	6	228	24.7	4.07	0	0	0	0	0	0	0.0540693	0	0	0	0	0	0	0	0.212498	0	0	0	0.956068	0	0	0
CBBNIB_00535	hypothetical protein	0	45.653	40	7	41	7	405	43.9	4.03	0	0	0	0	0	0	0.030439	0	0	0.656667	0	0	0	0	0.0478513	0	0	0	0	0	0	0
CBBNIB_00525	Spermidine/putrescine import ATP-binding protein PotA	0	6.377	7	2	7	2	391	41.7	4.6	0.0533673	0	0	0	0	0	0	0	0	0.0357989	0	0.0475472	0	0	0.0495647	0	0	0	0	0	0	0
CBBNIB_00510	hypothetical protein	0	59.198	19	10	38	10	796	83.6	4.67	0.235929	0	0	0	0.1208	0	0.077436	0	0.05137	0.0351693	0	0	0	0	0.0486929	0	0	0	0.0152138	0	0	0
CBBNIB_00485	hypothetical protein	0.001	3.36	5	1	3	1	234	24.6	6.18	0.0445868	0	0	0	0	0	0	0	0	0.0299089	0	0	0	0	0.0414098	0	0	0	0	0	0	0
CBBNIB_00455	hypothetical protein	0	34.204	33	12	40	12	561	58.9	4.21	0.24177	0	0	0	0.171402	0	0.197772	0.230907	0	0.0623769	0	0.0662779	0	0	0.0345451	0	0	0	0	2.25117	0	0
CBBNIB_00440	hypothetical protein	0	5.873	24	4	4	4	319	35.5	4.56	0	0	0	0	0	0	0	0	0	0	0	0	0	0	0.121503	0	0	0	0	0	0	0
CBBNIB_00425	hypothetical protein	0	37.887	33	10	16	10	478	50.4	4.49	0	0	0	0	0	0	0	0	0	0.234266	0	0	0	0	0	0	0	0	0	0	0	0
CBBNIB_00415	hypothetical protein	0	25.79	28	5	17	5	247	26.8	4.26	0.16896	0	0	0	0.233579	0	0.0998203	0	0	0.0566696	0	0.0752671	0	0	0.0392303	0	0	0	0.196117	0	0	0
CBBNIB_00410	hypothetical protein	0	10.789	13	4	9	4	614	65.5	4.64	0.0679694	0	0	0	0	0	0	0	0	0.0455941	0	0	0	0	0.0157816	0	0	0	0	0	0	0
CBBNIB_00405	hypothetical protein	0	16.577	10	3	6	3	473	47.1	5.76	0.0661732	0	0	0	0	0	0.026063	0	0	0.0147964	0	0	0	0	0	0	0	0	0.025603	0	0	0
CBBNIB_00395	hypothetical protein	0	44.412	33	7	19	7	304	32.5	4.48	0	0	0	0	0	0	0	0	0	0.046044	0	0.244618	0	0	0.41437	0	0	0	0	0	0	0
CBBNIB_00375	hypothetical protein	0.006	2.947	2	1	3	1	475	53.1	4.98	0.0219649	0	0	0	0	0	0	0	0	0	0	0.0782777	0	0	0	0	0	0	0	0	0	0
CBBNIB_00345	hypothetical protein	0	18.305	14	3	10	3	433	44.9	4.69	0.0722862	0	0	0	0	0	0.0284707	0	0	0.0323265	0	0	0	0	0.0671355	0	0	0	0.0279681	0	0	0
CBBNIB_00340	hypothetical protein	0	39.597	32	12	35	12	534	56.2	4.22	0.156304	0	0	0	0.0720274	0	0.530973	0	0	0.0262123	0	0	0	0	0	0	0	0	0	0	0	0
CBBNIB_00325	hypothetical protein	0.021	2.127	4	1	1	1	427	45.1	4.61	0.024434	0	0	0	0	0	0	0	0	0	0	0	0	0	0	0	0	0	0	0	0	0
CBBNIB_00315	hypothetical protein	0.025	1.797	5	1	2	1	225	24.3	4.37	0.0463703	0	0	0	0	0	0	0	0	0	0	0	0	0	0	0	0	0	0.0538231	0	0	0
CBBNIB_00295	hypothetical protein	0.001	3.393	5	1	2	1	435	47	4.36	0	0	0	0	0	0	0	0	0	0.0321779	0	0	0	0	0	0	0	0	0	0	0	0
CBBNIB_00280	hypothetical protein	0	10.464	32	6	10	6	317	35.4	4.6	0.0329126	0	0	0	0	0	0	0	0	0.0883116	0	0	0	0	0.152837	0	0	0	0	0	0	0
CBBNIB_00275	hypothetical protein	0	49.64	9	4	243	4	618	64.5	5.47	1.29994	1.12202	0	0.381297	0.809085	0	0.47875	0.104805	0	0.396366	1.1563	0.571567	0	0	0.642857	0.364091	0	0	0.215554	0	0	0
CBBNIB_00245	hypothetical protein	0	4.688	19	1	1	1	124	14	4.92	0	0	0	0	0	0	0	0	0	0	0	0	0	0	0	0	0	0	0.0976629	0	0	0
CBBNIB_00240	hypothetical protein	0.001	3.57	1	1	4	1	700	76.5	4.4	0.0149047	0	0	0	0.0549466	0	0	0	0	0.00999813	0	0	0	0	0	0	0	0	0	0	0	0
CBBNIB_00235	hypothetical protein	0.007	2.876	6	1	1	1	196	20.4	4.34	0.0532312	0	0	0	0	0	0	0	0	0	0	0	0	0	0	0	0	0	0	0	0	0
CBBNIB_00175	hypothetical protein	0	8.149	11	2	2	2	393	41.9	4.41	0.0265479	0	0	0	0	0	0	0	0	0	0	0.0473053	0	0	0	0	0	0	0	0	0	0
CBBNIB_00165	hypothetical protein	0.008	2.801	12	2	3	2	138	15	4.46	0	0	0	0	0	0	0.0893319	0	0	0.10143	0	0	0	0	0	0	0	0	0	0	0	0
CBBNIB_00160	hypothetical protein	0.021	2.085	7	1	3	1	213	23.6	4.84	0.0979653	0	0	0	0	0	0	0	0	0.0328577	0	0	0	0	0	0	0	0	0	0	0	0
CBBNIB_00150	hypothetical protein	0	19.915	18	5	8	5	353	38.8	4.55	0	0	0	0	0	0	0	0	0	0	0	0	0	0	0.219601	0	0	0	0	0	0	0
CBBNIB_00135	hypothetical protein	0	15.345	17	5	6	5	451	48.8	4.39	0	0	0	0	0	0	0	0	0	0.093109	0	0	0	0	0	0	0	0	0	0	0	0
CBBNIB_00105	hypothetical protein	0	28.166	27	6	37	6	376	39.4	4.28	0.166489	0	0	0	0.204589	0	0.0983602	0	0	0.0558406	0	0.395552	0	1.23516	0.180397	0	0	0	0.128832	0	0	0
CBBNIB_00075	NAD(P)H-binding protein	0	33.789	40	11	42	11	314	33.6	4.82	0.132908	0	0	0	0.0612463	0	0.117782	0	0	0.111444	0	0.236828	0	0	0.67891	0	0	0	0.115703	0	0	0
CBBNIB_00050	hypothetical protein	0.012	2.46	13	2	2	2	304	32.5	4.46	0	0	0	0	0	0	0	0	0	0	0	0	0	0	0.0637493	0	0	0	0	0	0	0
CBBNIB_00020	hypothetical protein	0	9.14	3	2	5	2	890	100.5	4.32	0.0468913	0	0	0	0.0216082	0	0	0	0	0	0	0	0	0	0	0	0	0	0	0	0	0
CBBNIB_00015	Dihydroorotate dehydrogenase (quinone)	0	53.272	57	14	31	14	351	37.1	4.79	0.0891736	0	0	0	0	0	0.035122	0	0	0.0797572	0	0.0529657	0	0	0.607344	0	0	0	0	0	0	0
CBBNIB_00005	hypothetical protein	0.012	2.493	16	1	1	1	109	12.5	4.55	0.0957184	0	0	0	0	0	0	0	0	0	0	0	0	0	0	0	0	0	0	0	0	0
