# Supplementary material for: Tale of Two viruses: Two coinfecting archaeal viruses provide insights into virus-virus interactions
Source: Research Square preprint supplement (doi:10.21203/rs.3.rs-7669873/v1), 2025-10-15
Supplement: Supplementary file 3 [file 8a08162ea6dba0d8cc5ad1f1.xlsx]

## Sheet: Supplementary Table 4
Genome	Organism	Pleolipovirus coocurrence	Pleolipovirus ICTV Taxonomy	Pleolipovirus Updated Taxonomy	Spike protein	orf5	orf6	ATPase
CP106966.fasta	Haloferax alexandrinus strain BNX82	Yes	Betapleolipovirus	Deltapleolipovirus	Confirmed	Confirmed	Confirmed	Confirmed
LSV-48N.fasta	Haloferax sp. Atlit-48N	Yes	Betapleolipovirus	Deltapleolipovirus	Confirmed	Confirmed	Confirmed	Confirmed
NZ_CP048738.fasta	Haloferax alexandrinus strain wsp1	No	-	-	No	No	Bad hit and single lose gene	Bad hit and single lose gene
NZ_QEQI01000006.fasta	Haloferax mucosum ATCC BAA-1512	Yes	Alpha (likely)	Divergent Alpha (likely)	Confirmed	Confirmed	Confirmed	Confirmed
NZ_AOLH000000001.fna	Haloferax lucentense DSM 14919	No	-	-	No	No	No	Bad hit and single lose gene
Tebi-PV1	Halorubrum strain (TLS6)	Yes	Betapleolipovirus	Betapleolipovirus	Confirmed	Confirmed	Confirmed	Confirmed
NZ_JAEPET010000001	Halorubrum LN27	Yes	Alphapleolipovirus	Alphapleolipovirus	Confirmed	Confirmed	Confirmed	Confirmed
