# Supplementary material for: Tale of Two viruses: Two coinfecting archaeal viruses provide insights into virus-virus interactions
Source: Research Square preprint supplement (doi:10.21203/rs.3.rs-7669873/v1), 2025-10-15
Supplement: Supplementary file 4 [file 8e49f356b225595306a341f5.xlsx]

## Sheet: Supplementary Table 6
Analysis with PADLOC
Organism	system	protein.name	target.name	target.description	seqid	start	end	strand	relative.position
Halorubrum sp. strain TLS-6	RM_type_I	REase_I	CBBNIB_05165	-	contig_1	989817	992778	-	1016
Halorubrum sp. strain TLS-6	RM_type_I	Specificity_I	CBBNIB_05170	-	contig_1	992770	994114	-	1017
Halorubrum sp. strain TLS-6	RM_type_I	MTase_I	CBBNIB_05175	-	contig_1	994106	995606	-	1018
Halorubrum sp. strain TLS-6	PDC-S70	PDC-S70	CBBNIB_05360	-	contig_1	1030739	1031246	-	1054
Halorubrum sp. strain TLS-6	RM_type_II	MTase_II	CBBNIB_06765	-	contig_2	126161	127376	-	114
Halorubrum sp. strain TLS-6	RM_type_II	REase_II	CBBNIB_06770	-	contig_2	127432	128620	+	115
Halorubrum sp. strain TLS-6	DMS_other	MTase_II	CBBNIB_14465	-	contig_5	33006	34185	+	32
Halorubrum sp. strain TLS-6	DMS_other	BrxHI	CBBNIB_14480	-	contig_5	34977	37032	-	34
Halorubrum sp. strain TLS-6	DMS_other	MTase_II	CBBNIB_15180	-	contig_7	20058	20847	+	27
Halorubrum sp. strain TLS-6	DMS_other	REase_II	CBBNIB_15195	-	contig_7	23672	24422	+	30
Halorubrum sp. strain TLS-6	DMS_other	SngC	CBBNIB_15210	-	contig_7	27358	30139	-	33
Halorubrum lacusprofundi ACAM34	argonaute_solo	pAgo	ACAM34_UNSW_01791	-	urn.local...1w-ewa3xc1	1777625	1779782	+	1754
Halorubrum lacusprofundi ACAM34	PDC-S27	PDC-S27	ACAM34_UNSW_01814	-	urn.local...1w-ewa3xc1	1803809	1805201	-	1777
Halobacterium salinarum	HEC-05	HEC-05	APQ99_00094	-	VRYN01000001.1	94065	95862	-	92
Halobacterium salinarum	PDC-S70	PDC-S70	APQ99_02234	-	VRYN01000010.1	26264	26777	+	27
Halobacterium salinarum	DMS_other	PglX	APQ99_02267	-	VRYN01000012.1	275	1394	-	2
Halobacterium salinarum	DMS_other	BrxA	APQ99_02268	-	VRYN01000012.1	1515	2355	+	3
Halobacterium salinarum	DMS_other	BrxC	APQ99_02269	-	VRYN01000012.1	2351	6053	+	4
Halobacterium salinarum	DMS_other	BrxB	APQ99_02270	-	VRYN01000012.1	6049	6676	+	5
Halobacterium salinarum	DMS_other	BrxC	APQ99_02271	-	VRYN01000012.1	6668	10364	+	6
Halobacterium salinarum	DMS_other	PglZ	APQ99_02272	-	VRYN01000012.1	10360	12487	+	7
Halobacterium salinarum	Tiamat	TmtA	APQ99_02275	-	VRYN01000012.1	14079	20052	+	10
Halobacterium salinarum	PDC-S27	PDC-S27	APQ99_02399	-	VRYN01000019.1	6270	7680	+	5
Halobacterium salinarum	PDC-S65	PDC-S65	APQ99_02454	-	VRYN01000027.1	3363	5109	+	5
Haloferax volcanii DS2	CRISPR_array	CRISPR_array	CRISPR001	CRISPR001; repeat=GTTTCAGACGAACCCTTGTGGGATTGAAGC; score=6.26	CP001955.1	204975	207584	+	183.01
Haloferax volcanii DS2	cas_type_I-B1	Cas6b	HVO_A0205	-	CP001955.1	207953	208772	+	184
Haloferax volcanii DS2	cas_type_I-B1	Cas8b	HVO_A0206	-	CP001955.1	208771	210925	+	185
Haloferax volcanii DS2	cas_type_I-B1	Cas7b	HVO_A0207	-	CP001955.1	210945	211968	+	186
Haloferax volcanii DS2	cas_type_I-B1	Cas5b	HVO_A0208	-	CP001955.1	211978	212776	+	187
Haloferax volcanii DS2	cas_type_I-B1	Cas3b	HVO_A0209	-	CP001955.1	212800	215614	+	188
Haloferax volcanii DS2	cas_type_I-B1	Cas4b	HVO_A0210	-	CP001955.1	215803	216355	+	189
Haloferax volcanii DS2	cas_type_I-B1	Cas1b	HVO_A0211	-	CP001955.1	216358	217354	+	190
Haloferax volcanii DS2	cas_type_I-B1	Cas2b	HVO_A0212	-	CP001955.1	217355	217616	+	191
Haloferax volcanii DS2	CRISPR_array	CRISPR_array	CRISPR002	CRISPR002; repeat=GTTTCAGACGAACCCTTGTGGGTTTGAAGC; score=6.16	CP001955.1	217813	218566	+	191.02
Haloferax volcanii DS2	PDC-S27	PDC-S27	HVO_A0254	-	CP001955.1	254888	256274	+	229
Haloferax volcanii DS2	SoFic	SoFic	HVO_A0401	-	CP001955.1	408661	409822	-	362
Haloferax volcanii DS2	RM_type_I	REase_I	HVO_2269	-	CP001956.1	2126757	2128980	+	2188
Haloferax volcanii DS2	RM_type_I	MTase_I	HVO_2270	-	CP001956.1	2128976	2130371	+	2189
Haloferax volcanii DS2	RM_type_I	Specificity_I	HVO_2271	-	CP001956.1	2130370	2131603	+	2190
Haloferax volcanii DS2	AVAST_type_II	Avs2	HVO_2276	-	CP001956.1	2136759	2140953	+	2196
Haloferax volcanii DS2	CRISPR_array	CRISPR_array	CRISPR003	CRISPR003; repeat=GTTTCAGACGAACCCTTGTGGGGTTGAAGC; score=6.21	CP001956.1	2385045	2386660	-	2433.01
Haloferax volcanii DS2	DMS_other	mad8	HVO_C0036	-	CP001957.1	26401	30316	+	29
Haloferax volcanii DS2	disarm_type_II	DrmMII	HVO_C0040	-	CP001957.1	34492	35713	+	33
Haloferax volcanii DS2	disarm_type_II	DrmE	HVO_C0041	-	CP001957.1	35916	38424	+	34
Haloferax volcanii DS2	disarm_type_II	DrmA	HVO_C0042	-	CP001957.1	38528	42353	+	35
Haloferax volcanii DS2	disarm_type_II	DrmB	HVO_C0043	-	CP001957.1	42447	44433	+	36
Haloferax volcanii DS2	disarm_type_II	DrmC	HVO_C0044	-	CP001957.1	44459	45461	+	37
Haloferax mediterranei	SoFic	SoFic	E6P09_02345	-	CP039139.1	472316	473456	-	453
Haloferax mediterranei	PDC-S11	PDC-S11	E6P09_07525	-	CP039139.1	1491991	1492942	+	1451
Haloferax mediterranei	CRISPR_array	CRISPR_array	CRISPR001	CRISPR001; repeat=GTTACAGACGAACCCTAGTTGGGTTGAAGC; score=6.26	CP039139.1	1864363	1865445	+	1836.01
Haloferax mediterranei	PDC-S70	PDC-S70	E6P09_09630	-	CP039139.1	1886172	1886679	+	1865
Haloferax mediterranei	CRISPR_array	CRISPR_array	CRISPR002	CRISPR002; repeat=GTTACAGACGAACCCTAGTTGGGTTGAAGC; score=6.26	CP039139.1	1893996	1895338	+	1878.02
Haloferax mediterranei	CRISPR_array	CRISPR_array	CRISPR003	CRISPR003; repeat=GTTACAGACGAACCCTAGTTGGGTTGAAGC; score=6.23	CP039139.1	2737079	2738717	+	2726.03
Haloferax mediterranei	CRISPR_array	CRISPR_array	CRISPR004	CRISPR004; repeat=GTTACAGACGAACCCTAGTTGGGTTGAAGC; score=6.21	CP039140.1	261859	263338	-	226.01
Haloferax mediterranei	cas_type_I-B1	Cas2b	E6P09_16315	-	CP039140.1	263436	263700	-	227
Haloferax mediterranei	cas_type_I-B1	Cas1b	E6P09_16320	-	CP039140.1	263703	264696	-	228
Haloferax mediterranei	cas_type_I-B1	Cas4b	E6P09_16325	-	CP039140.1	264697	265252	-	229
Haloferax mediterranei	cas_type_I-B1	Cas3b	E6P09_16330	-	CP039140.1	265248	267843	-	230
Haloferax mediterranei	cas_type_I-B1	Cas5b	E6P09_16335	-	CP039140.1	267844	268651	-	231
Haloferax mediterranei	cas_type_I-B1	Cas7b	E6P09_16340	-	CP039140.1	268653	269709	-	232
Haloferax mediterranei	cas_type_I-B1	Cas8b	E6P09_16345	-	CP039140.1	269713	271831	-	233
Haloferax mediterranei	cas_type_I-B1	Cas6b	E6P09_16350	-	CP039140.1	271817	272630	-	234
Haloferax mediterranei	CRISPR_array	CRISPR_array	CRISPR005	CRISPR005; repeat=GTTACAGACGAACCCTAATTGGGTTGAAGC; score=6.23	CP039140.1	273483	274173	+	234.02
Haloferax mediterranei	PDC-S27	PDC-S27	E6P09_18260	-	CP039141.1	207993	209391	+	167
Haloarcula japonica TR-1	PDC-S70	PDC-S70	Hjap01_00393	-	BAABQS010000001.1	360382	360892	+	385
Haloarcula japonica TR-1	brex_type_I	BrxL	Hjap01_02314	-	BAABQS010000002.1	733521	735549	-	779
Haloarcula japonica TR-1	brex_type_I	PglZ	Hjap01_02315	-	BAABQS010000002.1	735670	738097	-	780
Haloarcula japonica TR-1	brex_type_I	PglX	Hjap01_02317	-	BAABQS010000002.1	738843	742569	-	782
Haloarcula japonica TR-1	brex_type_I	BrxC	Hjap01_02319	-	BAABQS010000002.1	743394	747039	-	784
Haloarcula japonica TR-1	brex_type_I	BrxB	Hjap01_02320	-	BAABQS010000002.1	747031	747601	-	785
Haloarcula japonica TR-1	brex_type_I	BrxA	Hjap01_02321	-	BAABQS010000002.1	747590	748403	-	786
Haloarcula japonica TR-1	DMS_other	PbeA	Hjap01_02324	-	BAABQS010000002.1	750610	753202	+	789
Haloarcula japonica TR-1	argonaute_type_I	Aga_REase_Archaea	Hjap01_02335	-	BAABQS010000002.1	764681	766085	+	800
Haloarcula japonica TR-1	argonaute_type_I	pAgo_I	Hjap01_02336	-	BAABQS010000002.1	766081	767497	+	801
Haloarcula japonica TR-1	PDC-S11	PDC-S11	Hjap01_02337	-	BAABQS010000002.1	767668	768631	+	802
Haloarcula japonica TR-1	Tiamat	TmtA	Hjap01_02338	-	BAABQS010000002.1	768652	773488	-	803
Haloarcula japonica TR-1	SoFic	SoFic	Hjap01_03360	-	BAABQS010000004.1	411522	412695	+	368
Haloarcula japonica TR-1	argonaute_type_I	Aga_REase_Archaea	Hjap01_04171	-	BAABQS010000012.1	15006	16431	+	18
Haloarcula japonica TR-1	argonaute_type_I	pAgo_I	Hjap01_04172	-	BAABQS010000012.1	16802	17846	+	19
Haloarcula japonica TR-1	DMS_other	HmaB	Hjap01_04175	-	BAABQS010000012.1	22656	25545	-	22
Haloarcula japonica TR-1	DMS_other	HmaC	Hjap01_04177	-	BAABQS010000012.1	26193	29493	-	24
Haloarcula japonica TR-1	DMS_other	HmaA	Hjap01_04233	-	BAABQS010000013.1	11223	12519	-	14
Haloarcula japonica TR-1	DMS_other	HmaB	Hjap01_04236	-	BAABQS010000013.1	16857	19506	-	17
Haloarcula japonica TR-1	Tiamat	TmtA	Hjap01_04331	-	BAABQS010000017.1	12591	16827	-	14
Haloarcula japonica TR-1	PifA	PifA	Hjap01_04362	-	BAABQS010000020.1	389	2501	-	1
Haloterrigena turkmenica type strain (4kT)	PDC-S15	PDC-S15	Htur_0609	-	CP001860.1	635258	636158	+	relative.position
Haloterrigena turkmenica type strain (4kT)	DMS_other	REase_II	Htur_2122	-	CP001860.1	2193011	2193971	+	606
Haloterrigena turkmenica type strain (4kT)	DMS_other	MTase_II	Htur_2126	-	CP001860.1	2196487	2197600	+	2104
Haloterrigena turkmenica type strain (4kT)	DMS_other	SspA	Htur_3088	-	CP001860.1	3169782	3170907	+	2108
Haloterrigena turkmenica type strain (4kT)	DMS_other	mad3	Htur_3091	-	CP001860.1	3172580	3175544	+	3052
Haloquadratum walsbyi C23	cas_type_I-D	CARF3--CARF	Hqrw_1370	-	FR746099.1	392894	393539	-	315
Haloquadratum walsbyi C23	cas_type_I-D	Cas6d	Hqrw_1371	-	FR746099.1	393663	394530	+	316
Haloquadratum walsbyi C23	cas_type_I-D	Cas10_Id	Hqrw_1372	-	FR746099.1	394526	397580	+	317
Haloquadratum walsbyi C23	cas_type_I-D	Cas7d	Hqrw_1373	-	FR746099.1	397582	398572	+	318
Haloquadratum walsbyi C23	cas_type_I-D	Cas5d	Hqrw_1374	-	FR746099.1	398582	399326	+	319
Haloquadratum walsbyi C23	cas_type_I-D	Cas3d	Hqrw_1375	-	FR746099.1	399318	401469	+	320
Haloquadratum walsbyi C23	cas_type_I-D	Cas4d	Hqrw_1376	-	FR746099.1	401465	402083	+	321
Haloquadratum walsbyi C23	cas_type_I-D	Cas1d	Hqrw_1377	-	FR746099.1	402079	403075	+	322
Haloquadratum walsbyi C23	cas_type_I-D	Cas2d	Hqrw_1378	-	FR746099.1	403077	403350	+	323
Haloquadratum walsbyi C23	RM_type_II	MTase_II	Hqrw_2138	-	FR746099.1	1198243	1199098	+	971
Haloquadratum walsbyi C23	RM_type_II	REase_II	Hqrw_2139	-	FR746099.1	1199261	1200398	-	972
Haloquadratum walsbyi C23	PT_PbeABCD	PbeC	Hqrw_2253	-	FR746099.1	1303069	1305040	-	1064
Haloquadratum walsbyi C23	PT_PbeABCD	PbeA	Hqrw_2255	-	FR746099.1	1305307	1307350	-	1066
Haloquadratum walsbyi C23	DMS_other	HmaC	Hqrw_2256	-	FR746099.1	1307614	1311067	+	1067
Haloquadratum walsbyi C23	DMS_other	HmaB	Hqrw_2258	-	FR746099.1	1311700	1314553	+	1069
Haloquadratum walsbyi C23	DMS_other	DrmB	Hqrw_2260	-	FR746099.1	1318296	1320129	-	1071
Haloquadratum walsbyi C23	DMS_other	DrmA	Hqrw_2261	-	FR746099.1	1320125	1323638	-	1072
Haloquadratum walsbyi C23	DMS_other	mad3	Hqrw_2306	-	FR746099.1	1350547	1353265	+	1098
Haloquadratum walsbyi C23	DMS_other	mad8	Hqrw_2309	-	FR746099.1	1355102	1356716	+	1101
Haloquadratum walsbyi C23	PDC-S70	PDC-S70	Hqrw_2329	-	FR746099.1	1370367	1370886	-	1109
Haloquadratum walsbyi C23	cas_type_I-B1	Cas8b	Hqrw_2359	-	FR746099.1	1394788	1396834	+	1125
Haloquadratum walsbyi C23	cas_type_I-B1	Cas7b	Hqrw_2360	-	FR746099.1	1396826	1397849	+	1126
Haloquadratum walsbyi C23	cas_type_I-B1	Cas5b	Hqrw_2361	-	FR746099.1	1397863	1398694	+	1127
Haloquadratum walsbyi C23	cas_type_I-B1	Cas3b	Hqrw_2362	-	FR746099.1	1398690	1401411	+	1128
Haloquadratum walsbyi C23	cas_type_I-B1	Cas4b	Hqrw_2363	-	FR746099.1	1401407	1401956	+	1129
Haloquadratum walsbyi C23	cas_type_I-B1	Cas1b	Hqrw_2364	-	FR746099.1	1401958	1402954	+	1130
Haloquadratum walsbyi C23	cas_type_I-B1	Cas2b	Hqrw_2365	-	FR746099.1	1402955	1403216	+	1131
Haloquadratum walsbyi C23	HEC-06	HEC-06	Hqrw_2371	-	FR746099.1	1407358	1409479	+	1135
Haloquadratum walsbyi C23	HEC-06	HEC-06	Hqrw_2383	-	FR746099.1	1415236	1416934	-	1143
Haloquadratum walsbyi C23	DMS_other	PbeA	Hqrw_2389	-	FR746099.1	1420296	1421706	-	1146
Haloquadratum walsbyi C23	HEC-06	HEC-06	Hqrw_2616	-	FR746099.1	1624403	1626080	+	1312
Haloquadratum walsbyi C23	RM_type_I	REase_I	Hqrw_2618	-	FR746099.1	1626851	1629830	-	1314
Haloquadratum walsbyi C23	RM_type_I	Specificity_I	Hqrw_2619	-	FR746099.1	1629822	1631187	-	1315
Haloquadratum walsbyi C23	RM_type_I	Specificity_I	Hqrw_2620	-	FR746099.1	1631325	1632690	-	1316
Haloquadratum walsbyi C23	RM_type_I	MTase_I	Hqrw_2621	-	FR746099.1	1632682	1634185	-	1317
Haloquadratum walsbyi C23	PDC-S09	PDC-S09	Hqrw_3462	-	FR746099.1	2456948	2457239	+	1990
Haloquadratum walsbyi C23	DMS_other	mad8	Hqrw_3594	-	FR746099.1	2573468	2575424	+	2091
Haloquadratum walsbyi C23	DMS_other	mad3	Hqrw_3598	-	FR746099.1	2579543	2582600	+	2094
Haloquadratum walsbyi C23	PDC-S70	PDC-S70	Hqrw_4000	-	FR746099.1	2995305	2995818	+	2442
