# Supplementary material for: Tale of Two viruses: Two coinfecting archaeal viruses provide insights into virus-virus interactions
Source: Research Square preprint supplement (doi:10.21203/rs.3.rs-7669873/v1), 2025-10-15
Supplement: Supplementary file 5 [file f87afb8207cb5bbfe5a07c41.xlsx]

## Sheet: Supplementary Table 1
	VC	Size	Internal Weight	External Weight	Quality	P-value	Min Dist	Max Dist	Total Dist	Below Thres	Taxon Prediction Score	Avg Dist	Genera	Families	Orders	Members
0	VC_0_0	5	421.305	8.72535	0.97971	0.00134713	2.44949	4.69042	10	10	1	3.71937	1	1	1	AOLN01000011-H_mucosum_BAA-1512_Spindle-shape_virus_CDS,CP106966_-_H-alexandrinus_BNX82_spindle-shape_virus_CDS,H_alexandrinus_wsp1_spindle_shape_virus_CDS,NZ_AOLH01000008-H_lucentense_spindle-shape_virus_CDS,NZ_QEQI01000006-LSV-48N_Spindle-shape_virus_CDS
1	VC_10_0	2	39.378	4.75638	0.89223	0.185547	3	3	1	1	1	3	1	1	1	SSV_LN27,Tebi-SV1
2	VC_11_0	4	336.693	0	1	0	3	4.24264	6	6	1	3.76432	1	1	1	Haloarcula~californiae~icosahedral~virus~1,Haloarcula~hispanica~icosahedral~virus~2,Haloarcula~hispanica~virus~PH1,Haloarcula~hispanica~virus~SH1
3	VC_12_0	2	18.7792	15.6038	0.546177	0.10565	0	0	1	1	1	0	1	1	1	Haloarcula~hispanica~pleomorphic~virus~1,Haloarcula~hispanica~pleomorphic~virus~2
4	VC_13_0	3	32.1532	15.6038	0.673266	0.0140929	0	2.64575	3	3	1	1.76383	1	1	1	Halorubrum~pleomorphic~virus~1,Halorubrum~pleomorphic~virus~2,Halorubrum~pleomorphic~virus~6
5	VC_14_0	2	25.427	4.63177	0.84591	0.270146	1.41421	1.41421	1	1	1	1.41421	1	1	1	Haloarcula~hispanica~pleomorphic~virus~3,Haloarcula~hispanica~pleomorphic~virus~4
6	VC_15_0	3	112.845	0	1	0	6.16441	8.544	3	3	1	7.54856	1	1	1	Halobacterium~phage~phiH,Halobacterium~virus~ChaoS9,Natrialba~phage~PhiCh1
7	VC_16_0	4	1052.76	242.825	0.812575	0.00120732	1.41421	4.24264	6	6	1	3.56642	1	1	1	Haloferax~virus~HF1,Halorubrum~Tailed~Virus~5,Halorubrum~Tailed~Virus~8,Halorubrum~phage~HF2
8	VC_17_0	2	157.712	242.825	0.393751	0.0876221	2.44949	2.44949	1	1	1	2.44949	1	1	1	Halorubrum~Tailed~Virus~7,Halovirus~HSTV-2
9	VC_18_0	3	317.362	10.1865	0.968901	0.025915	4.58258	7.68115	3	3	1	6.49161	1	1	1	Halovirus~HCTV-1,Halovirus~HCTV-5,Halovirus~HVTV-1
10	VC_19_0	2	34.3035	10.1865	0.771038	0.144422	4	4	1	1	1	4	1	1	1	Halovirus~HCTV-2,Halovirus~HHTV-2
11	VC_1_0	3	184.285	0	1	0	1.41421	3.87298	3	3	1	3.05339	1	1	1	Acidianus~bottle-shaped~virus,Acidianus~bottle-shaped~virus~2~strain~ABV2,Acidianus~bottle-shaped~virus~3~strain~ABV3
12	VC_20_0	2	65.2495	0	1	0	0	0	1	1	1	0	1	2	2	Methanobacterium~phage~psiM2,Methanothermobacter~phage~psiM100
13	VC_21_0	2	12.9793	0	1	0	2	2	1	1	1	2	1	1	1	Pyrobaculum~spherical~virus,Thermoproteus~tenax~spherical~virus~1
14	VC_22_0	2	68.8567	0	1	0	1.73205	1.73205	1	1	1	1.73205	1	1	1	Sulfolobales~Beppu~filamentous~virus~2,Sulfolobus~filamentous~virus~1
15	VC_23_0	2	53.5269	10.4431	0.83675	0.185547	5	5	1	1	1	5	1	1	1	Sulfolobales~Virus~YNP2,Sulfolobales~virus~YNP1
16	VC_24_0	2	83.6156	0	1	0	0	0	1	1	1	0	1	1	1	Sulfolobus~polyhedral~virus~1,Sulfolobus~polyhedral~virus~2
17	VC_25_0	2	36.99	0	1	0	2	2	1	1	1	2	1	1	1	Sulfolobus~turreted~icosahedral~virus~1,Sulfolobus~turreted~icosahedral~virus~2
18	VC_2_0	6	1020.43	27.7012	0.973571	0.00457584	1.41421	6.85565	15	15	1	5.05582	1	1	1	Acidianus~filamentous~virus~3,Acidianus~filamentous~virus~6,Acidianus~filamentous~virus~7,Acidianus~filamentous~virus~8,Acidianus~filamentous~virus~9,Sulfolobus~islandicus~filamentous~virus
19	VC_3_0	2	42.2154	27.7012	0.603796	0.185547	3.74166	3.74166	1	1	1	3.74166	1	1	1	Acidianus~filamentous~virus~2,Sulfolobales~Beppu~filamentous~virus~3
20	VC_4_0	12	3920.6	810.788	0.828637	4.57e-17	1	6.9282	66	66	1	4.72512	4	1	1	Stygiolobus~rod-shaped~virus,Sulfolobus~islandicus~rod-shaped~virus~1,Sulfolobus~islandicus~rod-shaped~virus~10,Sulfolobus~islandicus~rod-shaped~virus~11,Sulfolobus~islandicus~rod-shaped~virus~2,Sulfolobus~islandicus~rod-shaped~virus~4,Sulfolobus~islandicus~rod-shaped~virus~5,Sulfolobus~islandicus~rod-shaped~virus~6,Sulfolobus~islandicus~rod-shaped~virus~7,Sulfolobus~islandicus~rod-shaped~virus~8…
21	VC_5_0	9	1031.1	125.527	0.891472	4.42e-06	1	6	36	36	1	4.42811	2	1	1	Acidianus~spindle-shaped~virus~1,Sulfolobus~spindle-shaped~virus~1,Sulfolobus~spindle-shaped~virus~2,Sulfolobus~spindle-shaped~virus~4,Sulfolobus~spindle-shaped~virus~5,Sulfolobus~spindle-shaped~virus~6,Sulfolobus~spindle-shaped~virus~7,Sulfolobus~virus~Kamchatka~1,Sulfolobus~virus~Ragged~Hills
22	VC_6_0	4	326.631	88.5341	0.786749	0.000544673	4.79583	6.16441	6	6	1	5.39051	1	1	1	Sulfolobus~monocaudavirus~SMV1,Sulfolobus~monocaudavirus~SMV2,Sulfolobus~monocaudavirus~SMV3,Sulfolobus~monocaudavirus~SMV4
23	VC_7_0	2	89.8087	22.5997	0.79895	0.270146	2	2	1	1	1	2	1	1	1	Sulfolobus~virus~STSV1,Sulfolobus~virus~STSV2
24	VC_8_0	2	19.782	0	1	0	4.89898	4.89898	1	1	1	4.89898	1	1	1	Archaeal~BJ1~virus,Halorubrum~phage~CGphi46
25	VC_9_0	6	248.531	2.26878	0.990954	0.0153271	1	4.24264	15	15	1	3.20855	2	2	2	Tebi-PV-1,Halogeometricum~pleomorphic~virus~1,Halorubrum~pleomorphic~virus~10,Halorubrum~pleomorphic~virus~11,Halorubrum~pleomorphic~virus~12,Halorubrum~pleomorphic~virus~9
